# Supplementary material for: Genome-Wide Differential DNA Methylation in Reproductive, Morphological, and Visual System Differences Between Queen Bee and Worker Bee (Apis mellifera)
Source: Front Genet. 2020 Aug 7;11:770. doi: 10.3389/fgene.2020.00770 (PMC7438783; doi:10.3389/fgene.2020.00770)
Supplement: TABLE S1 — Differentially Methylated Regions (DMRs) between queen larvae and worker larvae at the age of 3 days. [file Table_1.XLS]

## Sheet: GOStatic
GO Term	GO Sub Term	Hyper Count	Hyper Percentage	Hypo Count	Hypo Percentage
Biological_process	leukocyte proliferation	0	0	3	0.00704225
Biological_process	glycosylation	0	0	6	0.0140845
Biological_process	cerebellar cortex structural organization	0	0	5	0.0117371
Molecular_function	protein complex scaffold	0	0	4	0.00938967
Biological_process	cytoskeleton organization	32	0.102564	19	0.0446009
Biological_process	protein acylation	0	0	9	0.0211268
Biological_process	resolution of meiotic recombination intermediates	0	0	2	0.00469484
Biological_process	extracellular structure organization	0	0	12	0.028169
Cellular_component	mitochondrial part	0	0	0	0
Biological_process	negative regulation of mitotic metaphase/anaphase transition	0	0	2	0.00469484
Biological_process	purine ribonucleoside bisphosphate metabolic process	2	0.00641026	0	0
Biological_process	regulation of microtubule depolymerization	16	0.0512821	0	0
Biological_process	positive regulation of cell proliferation	0	0	0	0
Molecular_function	copper ion binding	4	0.0128205	0	0
Biological_process	epithelial cell migration, open tracheal system	0	0	12	0.028169
Biological_process	regulation of blood pressure	3	0.00961538	0	0
Biological_process	positive regulation of glucocorticoid metabolic process	0	0	3	0.00704225
Biological_process	regulation of metabolic process	44	0.141026	72	0.169014
Biological_process	renal vesicle induction	0	0	3	0.00704225
Cellular_component	synapse part	21	0.0673077	0	0
Biological_process	positive regulation of response to stimulus	5	0.0160256	26	0.0610329
Biological_process	metanephros development	0	0	3	0.00704225
Biological_process	regulation of neuron death	8	0.025641	0	0
Biological_process	nucleobase-containing compound biosynthetic process	18	0.0576923	42	0.0985915
Biological_process	deoxyribonucleotide metabolic process	2	0.00641026	0	0
Biological_process	axon extension involved in axon guidance	19	0.0608974	0	0
Biological_process	meiotic chromosome separation	0	0	2	0.00469484
Molecular_function	RNA polymerase II core promoter proximal region sequence-specific DNA binding transcription factor activity involved in positive regulation of transcription	0	0	7	0.0164319
Biological_process	regulation of cardiac muscle adaptation	2	0.00641026	0	0
Molecular_function	tRNA (guanine) methyltransferase activity	1	0.00320513	0	0
Biological_process	cytokinesis	0	0	19	0.0446009
Molecular_function	lyase activity	0	0	5	0.0117371
Molecular_function	catalytic activity	48	0.153846	109	0.255869
Biological_process	metanephric nephron morphogenesis	0	0	3	0.00704225
Biological_process	embryonic morphogenesis	0	0	17	0.0399061
Biological_process	DNA replication initiation	0	0	3	0.00704225
Biological_process	morphogenesis of a polarized epithelium	0	0	12	0.028169
Biological_process	response to hypoxia	36	0.115385	0	0
Biological_process	membrane organization	0	0	27	0.0633803
Molecular_function	ion gated channel activity	39	0.125	0	0
Biological_process	meiosis I cytokinesis	4	0.0128205	0	0
Biological_process	anatomical structure morphogenesis	15	0.0480769	43	0.100939
Biological_process	necrotic cell death	2	0.00641026	0	0
Biological_process	cellular macromolecule biosynthetic process	18	0.0576923	45	0.105634
Biological_process	regulation of transmembrane transporter activity	0	0	5	0.0117371
Biological_process	T cell proliferation	0	0	3	0.00704225
Cellular_component	endoplasmic reticulum	1	0.00320513	22	0.0516432
Biological_process	regulation of antibacterial peptide biosynthetic process	0	0	7	0.0164319
Biological_process	multi-organism process	47	0.150641	7	0.0164319
Biological_process	proline catabolic process	0	0	1	0.00234742
Biological_process	rRNA catabolic process	0	0	3	0.00704225
Biological_process	regulation of embryonic cell shape	4	0.0128205	0	0
Molecular_function	acid-amino acid ligase activity	0	0	15	0.0352113
Biological_process	regulation of proteasomal ubiquitin-dependent protein catabolic process	0	0	6	0.0140845
Biological_process	transcription initiation from RNA polymerase II promoter	0	0	5	0.0117371
Biological_process	aromatic compound biosynthetic process	0	0	42	0.0985915
Biological_process	negative regulation of cardiac muscle adaptation	2	0.00641026	0	0
Biological_process	regulation of ketone biosynthetic process	0	0	3	0.00704225
Biological_process	nuclear pore organization	0	0	2	0.00469484
Biological_process	regulation of proteasomal protein catabolic process	0	0	6	0.0140845
Biological_process	deoxyribonucleoside triphosphate metabolic process	2	0.00641026	0	0
Molecular_function	single-stranded RNA binding	0	0	4	0.00938967
Biological_process	negative regulation of reproductive process	0	0	3	0.00704225
Biological_process	regulation of nucleoside metabolic process	22	0.0705128	0	0
Cellular_component	cell projection part	1	0.00320513	0	0
Biological_process	cellular protein metabolic process	8	0.025641	54	0.126761
Cellular_component	mitotic spindle pole	3	0.00961538	0	0
Biological_process	positive regulation of cellular amide metabolic process	0	0	7	0.0164319
Molecular_function	oxidoreductase activity	15	0.0480769	1	0.00234742
Biological_process	regulation of multicellular organismal process	10	0.0320513	0	0
Biological_process	reflex	0	0	12	0.028169
Molecular_function	ATPase activity, coupled	0	0	23	0.0539906
Biological_process	negative regulation of wound healing	0	0	3	0.00704225
Biological_process	regulation of systemic arterial blood pressure	3	0.00961538	0	0
Biological_process	gland morphogenesis	0	0	21	0.0492958
Biological_process	respiratory gaseous exchange	0	0	4	0.00938967
Biological_process	purine-containing compound catabolic process	0	0	15	0.0352113
Biological_process	regulation of transcription involved in G1/S phase of mitotic cell cycle	0	0	1	0.00234742
Biological_process	adherens junction organization	0	0	12	0.028169
Biological_process	regulation of epidermal growth factor receptor signaling pathway	7	0.0224359	0	0
Biological_process	regulation of glucocorticoid metabolic process	0	0	3	0.00704225
Biological_process	histone H3-K4 methylation	0	0	4	0.00938967
Cellular_component	centralspindlin complex	1	0.00320513	0	0
Biological_process	nucleotide catabolic process	0	0	15	0.0352113
Biological_process	regulation of protein phosphorylation	0	0	11	0.0258216
Molecular_function	microtubule minus-end binding	15	0.0480769	0	0
Biological_process	positive regulation of intracellular steroid hormone receptor signaling pathway	0	0	3	0.00704225
Biological_process	ribonucleoside triphosphate metabolic process	0	0	15	0.0352113
Biological_process	lipid transport	0	0	16	0.0375587
Biological_process	mesonephric tubule development	0	0	3	0.00704225
Biological_process	establishment of localization	0	0	62	0.14554
Biological_process	cellular process involved in reproduction	0	0	38	0.0892019
Biological_process	cellular biosynthetic process	21	0.0673077	54	0.126761
Cellular_component	anaphase-promoting complex	0	0	2	0.00469484
Biological_process	response to endoplasmic reticulum stress	0	0	6	0.0140845
Biological_process	adherens junction maintenance	0	0	12	0.028169
Biological_process	cellular macromolecule catabolic process	0	0	36	0.084507
Biological_process	pole cell fate determination	1	0.00320513	0	0
Biological_process	axon guidance	3	0.00961538	0	0
Molecular_function	N-methyltransferase activity	0	0	6	0.0140845
Biological_process	cell-cell junction assembly	0	0	9	0.0211268
Biological_process	olfactory behavior	0	0	12	0.028169
Molecular_function	peptidylglycine monooxygenase activity	4	0.0128205	0	0
Biological_process	positive regulation of phosphorylation	0	0	10	0.0234742
Biological_process	non-canonical Wnt receptor signaling pathway	0	0	3	0.00704225
Biological_process	cell growth	19	0.0608974	8	0.0187793
Molecular_function	histone-lysine N-methyltransferase activity	0	0	6	0.0140845
Biological_process	DNA duplex unwinding	0	0	2	0.00469484
Cellular_component	intracellular membrane-bounded organelle	52	0.166667	107	0.251174
Biological_process	positive regulation of catalytic activity	21	0.0673077	0	0
Cellular_component	lamellar body membrane	1	0.00320513	0	0
Biological_process	nuclear pore complex assembly	0	0	2	0.00469484
Biological_process	multi-multicellular organism process	39	0.125	0	0
Biological_process	response to hydroperoxide	8	0.025641	0	0
Biological_process	response to extracellular stimulus	0	0	15	0.0352113
Biological_process	single-multicellular organism process	27	0.0865385	0	0
Biological_process	regulation of transporter activity	0	0	5	0.0117371
Cellular_component	H4/H2A histone acetyltransferase complex	3	0.00961538	0	0
Biological_process	non-canonical Wnt receptor signaling pathway via MAPK cascade	0	0	3	0.00704225
Biological_process	regulation of macromolecule biosynthetic process	22	0.0705128	49	0.115023
Biological_process	regulation of biosynthetic process	22	0.0705128	49	0.115023
Biological_process	regulation of focal adhesion assembly	0	0	4	0.00938967
Biological_process	regulation of testosterone biosynthetic process	0	0	3	0.00704225
Biological_process	regulation of meiosis	0	0	3	0.00704225
Molecular_function	steroid hormone receptor binding	0	0	4	0.00938967
Biological_process	response to biotic stimulus	0	0	0	0
Biological_process	cell death	2	0.00641026	0	0
Molecular_function	dihydrolipoyllysine-residue succinyltransferase activity	0	0	1	0.00234742
Cellular_component	nucleus	39	0.125	70	0.164319
Cellular_component	cytosol	1	0.00320513	29	0.0680751
Biological_process	organic substance transport	9	0.0288462	32	0.0751174
Biological_process	regulation of fibroblast growth factor receptor signaling pathway	0	0	3	0.00704225
Biological_process	regulation of rubidium ion transmembrane transporter activity	0	0	5	0.0117371
Biological_process	heterocycle biosynthetic process	0	0	45	0.105634
Biological_process	regulation of neurological system process	0	0	12	0.028169
Molecular_function	serine-type exopeptidase activity	3	0.00961538	0	0
Biological_process	T cell differentiation in thymus	0	0	3	0.00704225
Biological_process	nephron development	0	0	3	0.00704225
Biological_process	retinal cell programmed cell death	0	0	12	0.028169
Biological_process	protein acetylation	0	0	6	0.0140845
Molecular_function	transcription cofactor activity	0	0	0	0
Biological_process	organ morphogenesis	0	0	0	0
Biological_process	protein metabolic process	11	0.0352564	55	0.129108
Biological_process	chromosome organization involved in meiosis	0	0	6	0.0140845
Biological_process	cellular component assembly	8	0.025641	0	0
Biological_process	histone lysine methylation	0	0	5	0.0117371
Biological_process	ectodermal cell fate specification	0	0	7	0.0164319
Molecular_function	co-SMAD binding	0	0	5	0.0117371
Biological_process	response to nutrient levels	0	0	15	0.0352113
Cellular_component	leading edge membrane	0	0	4	0.00938967
Biological_process	mononuclear cell proliferation	0	0	3	0.00704225
Biological_process	single-organism carbohydrate metabolic process	0	0	0	0
Biological_process	chordate embryonic development	0	0	9	0.0211268
Biological_process	regulation of defense response to virus	2	0.00641026	0	0
Molecular_function	P-P-bond-hydrolysis-driven transmembrane transporter activity	0	0	15	0.0352113
Molecular_function	delta-catenin binding	13	0.0416667	0	0
Biological_process	cellular response to growth factor stimulus	0	0	9	0.0211268
Molecular_function	ATP binding	12	0.0384615	49	0.115023
Biological_process	embryo development	0	0	28	0.0657277
Biological_process	imaginal disc-derived wing vein morphogenesis	7	0.0224359	0	0
Biological_process	protein autophosphorylation	0	0	8	0.0187793
Molecular_function	identical protein binding	3	0.00961538	4	0.00938967
Biological_process	protein-DNA complex disassembly	0	0	2	0.00469484
Biological_process	positive regulation of ubiquitin-protein ligase activity involved in mitotic cell cycle	0	0	2	0.00469484
Biological_process	nuclear-transcribed mRNA catabolic process, deadenylation-dependent decay	0	0	8	0.0187793
Molecular_function	adenyl nucleotide binding	12	0.0384615	49	0.115023
Molecular_function	ATPase activity, coupled to movement of substances	0	0	15	0.0352113
Biological_process	response to other organism	0	0	0	0
Biological_process	smooth muscle cell differentiation	0	0	3	0.00704225
Biological_process	cytokinesis, actomyosin contractile ring assembly	4	0.0128205	0	0
Biological_process	negative regulation of proteolysis	0	0	6	0.0140845
Biological_process	negative regulation of muscle adaptation	2	0.00641026	0	0
Cellular_component	macromolecular complex	88	0.282051	0	0
Biological_process	biological regulation	137	0.439103	124	0.29108
Biological_process	regulation of cortisol biosynthetic process	0	0	3	0.00704225
Biological_process	regulation of membrane depolarization	2	0.00641026	0	0
Cellular_component	sperm individualization complex	0	0	12	0.028169
Biological_process	regulation of nucleotide metabolic process	22	0.0705128	0	0
Biological_process	regulation of small GTPase mediated signal transduction	7	0.0224359	0	0
Molecular_function	protein domain specific binding	0	0	0	0
Biological_process	regulation of renal sodium excretion	3	0.00961538	0	0
Molecular_function	transferase activity	7	0.0224359	0	0
Biological_process	regulation of vasculature development	0	0	4	0.00938967
Biological_process	response to oxygen-containing compound	0	0	0	0
Molecular_function	hydro-lyase activity	0	0	2	0.00469484
Biological_process	mitotic cell cycle, embryonic	4	0.0128205	0	0
Biological_process	protein autoubiquitination	0	0	7	0.0164319
Cellular_component	midbody	20	0.0641026	0	0
Biological_process	developmental growth involved in morphogenesis	19	0.0608974	0	0
Biological_process	regulation of production of molecular mediator of immune response	0	0	7	0.0164319
Cellular_component	apical part of cell	0	0	5	0.0117371
Biological_process	membrane fission	0	0	12	0.028169
Biological_process	regulation of membrane lipid distribution	0	0	15	0.0352113
Biological_process	regulation of striated muscle tissue development	0	0	0	0
Molecular_function	mitogen-activated protein kinase kinase kinase binding	0	0	4	0.00938967
Biological_process	ubiquitin-dependent protein catabolic process	0	0	15	0.0352113
Biological_process	regulation of cell junction assembly	0	0	4	0.00938967
Molecular_function	purine ribonucleoside triphosphate binding	12	0.0384615	65	0.152582
Biological_process	positive regulation of collagen metabolic process	0	0	3	0.00704225
Molecular_function	guanyl ribonucleotide binding	0	0	16	0.0375587
Biological_process	mitotic spindle checkpoint	0	0	2	0.00469484
Biological_process	actin-mediated cell contraction	4	0.0128205	0	0
Biological_process	single-organism transport	52	0.166667	0	0
Biological_process	cellular aromatic compound metabolic process	0	0	84	0.197183
Molecular_function	NF-kappaB binding	0	0	1	0.00234742
Molecular_function	metal ion binding	0	0	63	0.147887
Biological_process	cellular component organization or biogenesis	0	0	82	0.192488
Biological_process	phosphorus metabolic process	14	0.0448718	37	0.0868545
Biological_process	cell-cell signaling	38	0.121795	3	0.00704225
Biological_process	tube closure	0	0	2	0.00469484
Biological_process	regulation of meiotic cell cycle	0	0	3	0.00704225
Molecular_function	endonuclease activity, active with either ribo- or deoxyribonucleic acids and producing 5'-phosphomonoesters	0	0	2	0.00469484
Biological_process	DNA endoreduplication	0	0	2	0.00469484
Molecular_function	nucleic acid binding transcription factor activity	0	0	0	0
Molecular_function	3'-5' exonuclease activity	0	0	3	0.00704225
Biological_process	response to DDT	36	0.115385	0	0
Biological_process	multi-organism reproductive process	3	0.00961538	0	0
Biological_process	posttranscriptional regulation of gene expression	0	0	12	0.028169
Molecular_function	sequence-specific DNA binding RNA polymerase II transcription factor activity	0	0	0	0
Biological_process	negative regulation of cellular response to growth factor stimulus	0	0	3	0.00704225
Molecular_function	transcription factor binding	0	0	9	0.0211268
Biological_process	lipid biosynthetic process	0	0	0	0
Biological_process	organic acid metabolic process	0	0	2	0.00469484
Biological_process	positive regulation of cell-matrix adhesion	0	0	3	0.00704225
Biological_process	response to unfolded protein	0	0	2	0.00469484
Cellular_component	U4/U6 x U5 tri-snRNP complex	1	0.00320513	0	0
Biological_process	positive regulation of steroid hormone biosynthetic process	0	0	3	0.00704225
Biological_process	positive regulation of steroid biosynthetic process	0	0	3	0.00704225
Cellular_component	nuclear microtubule	0	0	1	0.00234742
Biological_process	negative regulation of protein glycosylation	2	0.00641026	0	0
Molecular_function	binding	0	0	150	0.352113
Biological_process	cellular developmental process	0	0	53	0.124413
Biological_process	cell cycle DNA replication	0	0	2	0.00469484
Molecular_function	ATP-dependent NAD(P)H-hydrate dehydratase activity	0	0	2	0.00469484
Molecular_function	ligase activity, forming carbon-nitrogen bonds	0	0	15	0.0352113
Biological_process	cellular nitrogen compound catabolic process	0	0	36	0.084507
Molecular_function	molecular transducer activity	4	0.0128205	0	0
Biological_process	negative regulation of blood vessel morphogenesis	0	0	3	0.00704225
Biological_process	branching involved in mammary gland duct morphogenesis	0	0	3	0.00704225
Biological_process	positive regulation of aldosterone metabolic process	0	0	3	0.00704225
Biological_process	microtubule-based process	27	0.0865385	0	0
Cellular_component	cytoplasm	69	0.221154	71	0.166667
Biological_process	DNA geometric change	0	0	2	0.00469484
Biological_process	molybdopterin cofactor metabolic process	0	0	2	0.00469484
Cellular_component	axolemma	0	0	4	0.00938967
Molecular_function	ATP-dependent helicase activity	0	0	7	0.0164319
Biological_process	cardiovascular system development	0	0	3	0.00704225
Biological_process	olfactory learning	0	0	12	0.028169
Cellular_component	Ski complex	1	0.00320513	0	0
Cellular_component	occluding junction	0	0	14	0.0328638
Biological_process	macromolecule metabolic process	28	0.0897436	100	0.234742
Biological_process	carbohydrate derivative catabolic process	0	0	15	0.0352113
Biological_process	regulation of glycoprotein biosynthetic process	2	0.00641026	0	0
Molecular_function	cation binding	0	0	63	0.147887
Biological_process	regulation of transcription, DNA-dependent	20	0.0641026	44	0.103286
Biological_process	macromolecule glycosylation	0	0	6	0.0140845
Biological_process	negative regulation of cellular component organization	17	0.0544872	0	0
Biological_process	branching involved in ureteric bud morphogenesis	0	0	3	0.00704225
Biological_process	regulation of tube size	0	0	9	0.0211268
Biological_process	chromatin modification	0	0	14	0.0328638
Molecular_function	glycine binding	2	0.00641026	0	0
Biological_process	regulation of RNA metabolic process	20	0.0641026	46	0.107981
Biological_process	cellular response to organic substance	0	0	0	0
Molecular_function	phosphoric ester hydrolase activity	0	0	1	0.00234742
Biological_process	spindle organization	8	0.025641	0	0
Biological_process	modification-dependent protein catabolic process	0	0	15	0.0352113
Biological_process	cellular component organization	0	0	80	0.187793
Molecular_function	adenyl ribonucleotide binding	12	0.0384615	49	0.115023
Molecular_function	retinoic acid receptor binding	0	0	1	0.00234742
Cellular_component	intrinsic to plasma membrane	42	0.134615	0	0
Biological_process	regulation of catabolic process	23	0.0737179	0	0
Molecular_function	protein complex binding	0	0	6	0.0140845
Molecular_function	cation transmembrane transporter activity	39	0.125	0	0
Biological_process	positive regulation of protein polymerization	4	0.0128205	0	0
Biological_process	embryonic placenta morphogenesis	0	0	1	0.00234742
Biological_process	mRNA 3'-end processing	0	0	8	0.0187793
Biological_process	dorsal/ventral pattern formation, imaginal disc	7	0.0224359	0	0
Biological_process	cellular macromolecule metabolic process	25	0.0801282	100	0.234742
Biological_process	regulation of dermatome development	0	0	3	0.00704225
Biological_process	regulation of vesicle-mediated transport	0	0	0	0
Biological_process	cystoblast division	2	0.00641026	0	0
Biological_process	protein lipidation	0	0	3	0.00704225
Molecular_function	repressing transcription factor binding	0	0	7	0.0164319
Cellular_component	condensed chromosome kinetochore	0	0	2	0.00469484
Biological_process	protein targeting to membrane	0	0	9	0.0211268
Biological_process	nucleobase-containing small molecule metabolic process	0	0	19	0.0446009
Biological_process	positive regulation of peptide hormone secretion	2	0.00641026	0	0
Biological_process	learning or memory	0	0	12	0.028169
Biological_process	cellular glucan metabolic process	2	0.00641026	0	0
Biological_process	negative regulation of protein catabolic process	0	0	6	0.0140845
Biological_process	mRNA catabolic process	0	0	17	0.0399061
Biological_process	regulation of cell migration	0	0	0	0
Cellular_component	presynaptic active zone	19	0.0608974	0	0
Biological_process	negative regulation of growth	0	0	0	0
Biological_process	sodium ion transport	36	0.115385	0	0
Biological_process	cell cycle process	27	0.0865385	41	0.0962441
Biological_process	peripheral nervous system neuron development	0	0	7	0.0164319
Molecular_function	S-succinyltransferase activity	0	0	1	0.00234742
Biological_process	organic substance metabolic process	56	0.179487	123	0.288732
Biological_process	neural tube closure	0	0	2	0.00469484
Molecular_function	receptor activity	2	0.00641026	4	0.00938967
Biological_process	positive regulation of mitochondrial depolarization	2	0.00641026	0	0
Molecular_function	lipopolysaccharide binding	0	0	2	0.00469484
Biological_process	internal peptidyl-lysine acetylation	0	0	6	0.0140845
Biological_process	purine ribonucleotide catabolic process	0	0	15	0.0352113
Biological_process	plasmatocyte differentiation	0	0	7	0.0164319
Biological_process	regulation of tube architecture, open tracheal system	0	0	21	0.0492958
Biological_process	heme biosynthetic process	3	0.00961538	0	0
Molecular_function	GTPase activator activity	28	0.0897436	0	0
Molecular_function	signal transducer activity	4	0.0128205	0	0
Biological_process	regulation of collagen metabolic process	0	0	3	0.00704225
Biological_process	transmembrane receptor protein serine/threonine kinase signaling pathway	0	0	5	0.0117371
Biological_process	pigment granule aggregation in cell center	0	0	2	0.00469484
Biological_process	paramesonephric duct development	0	0	3	0.00704225
Biological_process	regulation of gene expression, epigenetic	0	0	7	0.0164319
Cellular_component	extracellular organelle	0	0	19	0.0446009
Cellular_component	plasma membrane part	45	0.144231	5	0.0117371
Biological_process	wing disc dorsal/ventral pattern formation	7	0.0224359	0	0
Biological_process	positive regulation of focal adhesion assembly	0	0	3	0.00704225
Biological_process	regulation of rubidium ion transport	0	0	5	0.0117371
Biological_process	organ development	1	0.00320513	0	0
Biological_process	protein monoubiquitination	0	0	2	0.00469484
Biological_process	pseudocleavage involved in syncytial blastoderm formation	4	0.0128205	0	0
Biological_process	nucleoside triphosphate catabolic process	0	0	15	0.0352113
Biological_process	neuroepithelial cell differentiation	0	0	3	0.00704225
Biological_process	glial cell development	0	0	9	0.0211268
Molecular_function	enzyme regulator activity	29	0.0929487	3	0.00704225
Biological_process	granzyme-mediated apoptotic signaling pathway	0	0	1	0.00234742
Biological_process	protein K63-linked ubiquitination	0	0	2	0.00469484
Biological_process	deoxyribose phosphate metabolic process	2	0.00641026	0	0
Biological_process	regulation of hormone biosynthetic process	0	0	3	0.00704225
Biological_process	L-lysine catabolic process	0	0	1	0.00234742
Biological_process	lung alveolus development	0	0	4	0.00938967
Biological_process	clathrin-mediated endocytosis	0	0	12	0.028169
Molecular_function	protein tyrosine kinase activity	0	0	6	0.0140845
Biological_process	RNA processing	1	0.00320513	0	0
Biological_process	negative regulation of glycoprotein biosynthetic process	2	0.00641026	0	0
Biological_process	secretion by cell	0	0	0	0
Cellular_component	spectrosome	2	0.00641026	0	0
Biological_process	positive regulation of actin filament polymerization	4	0.0128205	0	0
Biological_process	nuclear-transcribed mRNA poly(A) tail shortening	0	0	8	0.0187793
Biological_process	single-organism cellular process	163	0.522436	0	0
Biological_process	regulation of transmembrane transport	0	0	5	0.0117371
Biological_process	microtubule severing	15	0.0480769	0	0
Biological_process	regulation of neuronal synaptic plasticity	0	0	12	0.028169
Biological_process	cytokinetic process	4	0.0128205	4	0.00938967
Biological_process	biosynthetic process	21	0.0673077	54	0.126761
Cellular_component	cytoskeletal part	37	0.11859	0	0
Biological_process	establishment of vesicle localization	0	0	14	0.0328638
Biological_process	purine-containing compound metabolic process	0	0	15	0.0352113
Cellular_component	postsynaptic membrane	0	0	0	0
Molecular_function	histone methyltransferase activity	0	0	6	0.0140845
Biological_process	sex determination	0	0	3	0.00704225
Molecular_function	proteasome binding	0	0	6	0.0140845
Cellular_component	oxoglutarate dehydrogenase complex	0	0	1	0.00234742
Biological_process	aggressive behavior	8	0.025641	0	0
Biological_process	negative regulation of programmed cell death	0	0	0	0
Biological_process	testicular fusome organization	2	0.00641026	0	0
Biological_process	gastrulation involving germ band extension	0	0	7	0.0164319
Biological_process	cell fate specification	0	0	7	0.0164319
Biological_process	post-embryonic limb morphogenesis	7	0.0224359	0	0
Biological_process	GTP catabolic process	0	0	12	0.028169
Biological_process	regulation of muscle tissue development	0	0	0	0
Molecular_function	voltage-gated sodium channel activity	36	0.115385	0	0
Biological_process	regulation of ubiquitin-protein ligase activity involved in mitotic cell cycle	0	0	2	0.00469484
Biological_process	hippocampus development	0	0	5	0.0117371
Molecular_function	phosphatidylinositol-4,5-bisphosphate binding	4	0.0128205	0	0
Cellular_component	cytoplasmic part	29	0.0929487	0	0
Biological_process	regulation of signal transduction	0	0	33	0.0774648
Biological_process	intrinsic apoptotic signaling pathway by p53 class mediator	0	0	6	0.0140845
Cellular_component	spindle midzone	3	0.00961538	0	0
Biological_process	regulation of cell-matrix adhesion	0	0	4	0.00938967
Biological_process	response to external stimulus	40	0.128205	0	0
Biological_process	developmental induction	0	0	3	0.00704225
Cellular_component	synaptic membrane	0	0	0	0
Biological_process	regulation of Ras protein signal transduction	7	0.0224359	0	0
Cellular_component	molybdopterin synthase complex	0	0	2	0.00469484
Cellular_component	ER membrane insertion complex	0	0	6	0.0140845
Biological_process	establishment of organelle localization	0	0	19	0.0446009
Biological_process	synaptonemal complex organization	0	0	6	0.0140845
Molecular_function	actin binding	0	0	12	0.028169
Cellular_component	BBSome	0	0	2	0.00469484
Biological_process	neuroendocrine cell differentiation	0	0	3	0.00704225
Biological_process	mechanosensory behavior	36	0.115385	0	0
Biological_process	positive regulation of signal transduction	0	0	25	0.0586854
Biological_process	single organism reproductive process	0	0	18	0.0422535
Biological_process	regulation of purine nucleotide catabolic process	22	0.0705128	0	0
Cellular_component	nuclear ubiquitin ligase complex	0	0	2	0.00469484
Biological_process	protein modification by small protein removal	0	0	5	0.0117371
Cellular_component	axon	0	0	0	0
Biological_process	mesenchymal to epithelial transition	0	0	3	0.00704225
Biological_process	negative regulation of canonical Wnt receptor signaling pathway	0	0	4	0.00938967
Biological_process	positive regulation of biomineral tissue development	0	0	3	0.00704225
Biological_process	histone H3-K36 methylation	0	0	1	0.00234742
Biological_process	negative regulation of transcription, DNA-dependent	0	0	16	0.0375587
Biological_process	DNA-dependent transcription, initiation	0	0	5	0.0117371
Biological_process	regulation of multi-organism process	0	0	7	0.0164319
Biological_process	negative regulation of hormone metabolic process	0	0	3	0.00704225
Biological_process	spindle midzone assembly	2	0.00641026	0	0
Biological_process	response to abiotic stimulus	37	0.11859	0	0
Biological_process	regulation of transcription from RNA polymerase II promoter	2	0.00641026	0	0
Biological_process	purine deoxyribonucleoside triphosphate metabolic process	2	0.00641026	0	0
Molecular_function	SMAD binding	0	0	5	0.0117371
Biological_process	positive regulation of wound healing	4	0.0128205	0	0
Biological_process	positive regulation of protein metabolic process	2	0.00641026	0	0
Biological_process	purine ribonucleotide metabolic process	0	0	15	0.0352113
Biological_process	negative regulation of cellular metabolic process	0	0	25	0.0586854
Biological_process	regulation of cell projection organization	0	0	0	0
Biological_process	innate immune response	0	0	7	0.0164319
Biological_process	positive regulation of establishment of protein localization to plasma membrane	0	0	5	0.0117371
Molecular_function	ribonuclease III activity	0	0	2	0.00469484
Biological_process	negative regulation of cell differentiation	0	0	0	0
Biological_process	ovarian fusome organization	2	0.00641026	0	0
Biological_process	hormone biosynthetic process	0	0	3	0.00704225
Biological_process	regulation of canonical Wnt receptor signaling pathway	0	0	4	0.00938967
Biological_process	cytoplasmic sequestering of NF-kappaB	0	0	1	0.00234742
Molecular_function	MAP kinase kinase kinase activity	0	0	3	0.00704225
Molecular_function	purine nucleotide binding	13	0.0416667	65	0.152582
Biological_process	regulation of cell-substrate junction assembly	0	0	4	0.00938967
Biological_process	endocytosis	0	0	12	0.028169
Biological_process	purine nucleoside metabolic process	0	0	15	0.0352113
Cellular_component	alveolar lamellar body membrane	1	0.00320513	0	0
Biological_process	gastrulation with mouth forming first	0	0	7	0.0164319
Cellular_component	centrosome	33	0.105769	0	0
Cellular_component	membrane part	0	0	45	0.105634
Biological_process	regulation of TOR signaling cascade	0	0	3	0.00704225
Biological_process	metal ion transport	39	0.125	1	0.00234742
Biological_process	epithelium development	0	0	4	0.00938967
Biological_process	erythrocyte differentiation	3	0.00961538	0	0
Biological_process	positive regulation of GTPase activity	21	0.0673077	0	0
Biological_process	membrane tubulation	4	0.0128205	0	0
Biological_process	receptor-mediated endocytosis	0	0	12	0.028169
Molecular_function	oxidoreductase activity, acting on paired donors, with incorporation or reduction of molecular oxygen, reduced ascorbate as one donor, and incorporation of one atom of oxygen	4	0.0128205	0	0
Biological_process	rRNA metabolic process	0	0	3	0.00704225
Biological_process	telomere maintenance	0	0	4	0.00938967
Biological_process	positive regulation of canonical Wnt receptor signaling pathway	0	0	3	0.00704225
Biological_process	assembly of actomyosin apparatus involved in cytokinesis	4	0.0128205	0	0
Biological_process	female pregnancy	3	0.00961538	0	0
Biological_process	vesicle organization	0	0	12	0.028169
Biological_process	DNA replication checkpoint	0	0	1	0.00234742
Biological_process	stem cell differentiation	0	0	3	0.00704225
Biological_process	regulation of systemic arterial blood pressure by hormone	3	0.00961538	0	0
Biological_process	organic substance catabolic process	6	0.0192308	53	0.124413
Biological_process	proteasomal ubiquitin-dependent protein catabolic process	0	0	4	0.00938967
Cellular_component	BAF-type complex	7	0.0224359	0	0
Biological_process	post-embryonic development	0	0	15	0.0352113
Molecular_function	nucleoside phosphate binding	22	0.0705128	74	0.173709
Cellular_component	NuA4 histone acetyltransferase complex	3	0.00961538	0	0
Biological_process	nuclear division	0	0	11	0.0258216
Molecular_function	active transmembrane transporter activity	0	0	15	0.0352113
Biological_process	dorsal/ventral axis specification	0	0	7	0.0164319
Biological_process	establishment of pigment granule localization	0	0	2	0.00469484
Molecular_function	3'-5'-exoribonuclease activity	0	0	3	0.00704225
Biological_process	striated muscle cell differentiation	4	0.0128205	0	0
Biological_process	negative regulation of apoptotic process	0	0	0	0
Biological_process	positive regulation of transcription from RNA polymerase II promoter	2	0.00641026	0	0
Molecular_function	histone methyltransferase activity (H3-K9 specific)	0	0	4	0.00938967
Biological_process	positive regulation of antibacterial peptide biosynthetic process	0	0	7	0.0164319
Molecular_function	transition metal ion binding	5	0.0160256	32	0.0751174
Biological_process	spindle assembly	6	0.0192308	0	0
Biological_process	female germline ring canal formation, actin assembly	2	0.00641026	0	0
Biological_process	guanosine tetraphosphate metabolic process	2	0.00641026	0	0
Biological_process	response to growth factor stimulus	0	0	9	0.0211268
Biological_process	cytoskeletal matrix organization at active zone	19	0.0608974	0	0
Biological_process	membrane budding	0	0	12	0.028169
Biological_process	glandular epithelial cell differentiation	0	0	3	0.00704225
Biological_process	zonula adherens maintenance	13	0.0416667	0	0
Biological_process	salivary gland morphogenesis	0	0	21	0.0492958
Biological_process	localization within membrane	0	0	6	0.0140845
Biological_process	positive regulation of transporter activity	0	0	5	0.0117371
Molecular_function	lipid transporter activity	0	0	15	0.0352113
Cellular_component	ion channel complex	36	0.115385	0	0
Biological_process	protein secretion	5	0.0160256	0	0
Molecular_function	4 iron, 4 sulfur cluster binding	0	0	2	0.00469484
Biological_process	RNA splicing	0	0	0	0
Biological_process	anatomical structure development	0	0	70	0.164319
Biological_process	male courtship behavior, veined wing generated song production	36	0.115385	0	0
Biological_process	positive regulation of embryonic development	0	0	3	0.00704225
Cellular_component	neuromuscular junction	0	0	7	0.0164319
Biological_process	response to organonitrogen compound	1	0.00320513	0	0
Biological_process	regulation of intracellular protein kinase cascade	1	0.00320513	0	0
Cellular_component	cell cortex	5	0.0160256	5	0.0117371
Biological_process	epithelial tube formation	0	0	3	0.00704225
Biological_process	synaptic vesicle endocytosis	0	0	12	0.028169
Biological_process	adrenal gland development	0	0	3	0.00704225
Biological_process	GTP metabolic process	0	0	12	0.028169
Biological_process	compound eye photoreceptor development	20	0.0641026	0	0
Biological_process	cellular lipid metabolic process	0	0	0	0
Biological_process	regulation of Ras GTPase activity	19	0.0608974	0	0
Biological_process	membrane depolarization involved in regulation of action potential	36	0.115385	0	0
Biological_process	positive regulation of antimicrobial peptide biosynthetic process	0	0	7	0.0164319
Biological_process	cell junction assembly	0	0	9	0.0211268
Biological_process	tail-anchored membrane protein insertion into ER membrane	0	0	6	0.0140845
Molecular_function	ribonucleoprotein complex binding	0	0	6	0.0140845
Molecular_function	hydrolase activity, acting on acid anhydrides	0	0	42	0.0985915
Biological_process	regulation of neuron projection development	0	0	0	0
Biological_process	oxoacid metabolic process	0	0	2	0.00469484
Biological_process	neuron differentiation	12	0.0384615	0	0
Biological_process	positive regulation of peptidyl-threonine phosphorylation	0	0	5	0.0117371
Biological_process	cell recognition	0	0	0	0
Biological_process	imaginal disc-derived appendage morphogenesis	14	0.0448718	0	0
Biological_process	protein deubiquitination	0	0	5	0.0117371
Molecular_function	neurotransmitter binding	2	0.00641026	0	0
Biological_process	mesonephros development	0	0	3	0.00704225
Cellular_component	nuclear exosome (RNase complex)	0	0	1	0.00234742
Biological_process	memory	0	0	12	0.028169
Biological_process	segment specification	7	0.0224359	0	0
Biological_process	sperm individualization	0	0	12	0.028169
Biological_process	chromosome separation	0	0	2	0.00469484
Biological_process	purine nucleotide catabolic process	0	0	15	0.0352113
Biological_process	cytoplasmic transport	0	0	0	0
Molecular_function	ATPase activity	0	0	27	0.0633803
Cellular_component	non-membrane-bounded organelle	51	0.163462	34	0.0798122
Biological_process	peptidyl-lysine modification	0	0	7	0.0164319
Molecular_function	tRNA (guanine-N2-)-methyltransferase activity	1	0.00320513	0	0
Biological_process	vesicle-mediated transport	3	0.00961538	22	0.0516432
Biological_process	intrinsic apoptotic signaling pathway in response to DNA damage	0	0	6	0.0140845
Biological_process	establishment of protein localization	0	0	19	0.0446009
Biological_process	mitotic spindle elongation	15	0.0480769	0	0
Biological_process	phospholipid metabolic process	0	0	0	0
Biological_process	proximal/distal pattern formation	0	0	9	0.0211268
Biological_process	proteasomal protein catabolic process	0	0	4	0.00938967
Biological_process	regulation of immune effector process	0	0	7	0.0164319
Biological_process	multicellular organismal reproductive process	45	0.144231	0	0
Biological_process	morphogenesis of embryonic epithelium	0	0	9	0.0211268
Biological_process	regulation of homeostatic process	5	0.0160256	0	0
Biological_process	regulation of cellular localization	2	0.00641026	0	0
Biological_process	feeding behavior	0	0	12	0.028169
Biological_process	positive regulation of Notch signaling pathway	0	0	12	0.028169
Cellular_component	cation channel complex	36	0.115385	0	0
Biological_process	porphyrin-containing compound metabolic process	3	0.00961538	0	0
Biological_process	nucleosome organization	3	0.00961538	3	0.00704225
Biological_process	regulation of intracellular estrogen receptor signaling pathway	0	0	4	0.00938967
Biological_process	negative regulation of hormone biosynthetic process	0	0	3	0.00704225
Cellular_component	intrinsic to membrane	0	0	38	0.0892019
Cellular_component	mitotic spindle midzone	3	0.00961538	0	0
Biological_process	macromolecule biosynthetic process	18	0.0576923	46	0.107981
Molecular_function	protein methyltransferase activity	0	0	6	0.0140845
Biological_process	cellular component maintenance	32	0.102564	12	0.028169
Biological_process	regulation of translational termination	0	0	3	0.00704225
Biological_process	immature T cell proliferation in thymus	0	0	3	0.00704225
Cellular_component	ribonucleoprotein complex	1	0.00320513	0	0
Cellular_component	mitotic spindle	3	0.00961538	4	0.00938967
Biological_process	taxis	3	0.00961538	0	0
Biological_process	protein localization to organelle	6	0.0192308	6	0.0140845
Cellular_component	cytoskeleton	0	0	16	0.0375587
Molecular_function	1-pyrroline-5-carboxylate dehydrogenase activity	0	0	1	0.00234742
Biological_process	nucleoside metabolic process	0	0	15	0.0352113
Biological_process	single organism signaling	38	0.121795	3	0.00704225
Biological_process	L-lysine catabolic process to acetyl-CoA via saccharopine	0	0	1	0.00234742
Biological_process	glycosyl compound metabolic process	0	0	15	0.0352113
Biological_process	synaptonemal complex assembly	0	0	6	0.0140845
Biological_process	heart process	0	0	9	0.0211268
Molecular_function	GTP binding	0	0	16	0.0375587
Biological_process	regulation of cytoskeleton organization	21	0.0673077	17	0.0399061
Biological_process	activation of Ras GTPase activity	19	0.0608974	0	0
Biological_process	embryonic epithelial tube formation	0	0	3	0.00704225
Biological_process	metanephric mesenchymal cell differentiation	0	0	3	0.00704225
Biological_process	larval behavior	0	0	12	0.028169
Biological_process	ncRNA processing	0	0	5	0.0117371
Biological_process	purine ribonucleoside metabolic process	0	0	15	0.0352113
Molecular_function	endonuclease activity	0	0	8	0.0187793
Biological_process	immature T cell proliferation	0	0	3	0.00704225
Molecular_function	microtubule motor activity	5	0.0160256	0	0
Biological_process	cellular response to hydroperoxide	8	0.025641	0	0
Biological_process	modification-dependent macromolecule catabolic process	0	0	15	0.0352113
Molecular_function	acyl-CoA dehydrogenase activity	3	0.00961538	0	0
Molecular_function	GTPase regulator activity	29	0.0929487	0	0
Biological_process	regulation of developmental growth	0	0	0	0
Biological_process	R7 cell development	19	0.0608974	0	0
Cellular_component	voltage-gated sodium channel complex	36	0.115385	0	0
Biological_process	gene expression	0	0	13	0.0305164
Biological_process	eye photoreceptor cell development	21	0.0673077	0	0
Biological_process	muscle fiber development	0	0	6	0.0140845
Biological_process	regulation of cellular macromolecule biosynthetic process	22	0.0705128	49	0.115023
Biological_process	ribonucleotide catabolic process	0	0	15	0.0352113
Biological_process	protein modification process	7	0.0224359	54	0.126761
Molecular_function	kinesin binding	0	0	4	0.00938967
Molecular_function	regulatory region DNA binding	0	0	0	0
Cellular_component	Golgi membrane	0	0	4	0.00938967
Biological_process	canonical Wnt receptor signaling pathway	0	0	3	0.00704225
Biological_process	regulation of organelle organization	22	0.0705128	21	0.0492958
Biological_process	regulation of synaptic transmission	0	0	12	0.028169
Biological_process	cell part morphogenesis	1	0.00320513	3	0.00704225
Cellular_component	chromosomal part	2	0.00641026	13	0.0305164
Biological_process	coronary vasculature morphogenesis	0	0	1	0.00234742
Biological_process	regulation of phosphate metabolic process	22	0.0705128	0	0
Biological_process	cell motility	1	0.00320513	25	0.0586854
Molecular_function	RNA binding	2	0.00641026	0	0
Biological_process	conditioned taste aversion	0	0	12	0.028169
Molecular_function	hydrolase activity	0	0	59	0.138498
Biological_process	regulation of cellular catabolic process	22	0.0705128	0	0
Biological_process	neuroblast fate commitment	7	0.0224359	0	0
Cellular_component	smooth endoplasmic reticulum	0	0	4	0.00938967
Cellular_component	supraspliceosomal complex	0	0	3	0.00704225
Biological_process	pattern specification process	0	0	18	0.0422535
Biological_process	nucleoside catabolic process	0	0	15	0.0352113
Biological_process	regulation of synapse structure and activity	0	0	12	0.028169
Biological_process	neurogenesis	14	0.0448718	0	0
Biological_process	negative regulation of T cell receptor signaling pathway	1	0.00320513	0	0
Cellular_component	female germline ring canal inner rim	2	0.00641026	0	0
Biological_process	regulation of antimicrobial peptide biosynthetic process	0	0	7	0.0164319
Cellular_component	PTW/PP1 phosphatase complex	2	0.00641026	0	0
Biological_process	embryonic development via the syncytial blastoderm	0	0	4	0.00938967
Biological_process	regulation of cell morphogenesis involved in differentiation	0	0	0	0
Biological_process	regulation of action potential in neuron	36	0.115385	0	0
Biological_process	neurological system process	5	0.0160256	0	0
Biological_process	kidney morphogenesis	0	0	3	0.00704225
Molecular_function	exoribonuclease activity, producing 5'-phosphomonoesters	0	0	3	0.00704225
Biological_process	dendrite development	2	0.00641026	0	0
Biological_process	protein-cofactor linkage	0	0	1	0.00234742
Biological_process	ion transport	39	0.125	0	0
Biological_process	ribosome biogenesis	0	0	2	0.00469484
Biological_process	negative regulation of testicular blood vessel morphogenesis	0	0	3	0.00704225
Cellular_component	growth cone	0	0	5	0.0117371
Biological_process	intracellular protein transport	0	0	10	0.0234742
Biological_process	single-organism biosynthetic process	0	0	0	0
Biological_process	intrinsic apoptotic signaling pathway in response to DNA damage by p53 class mediator	0	0	6	0.0140845
Biological_process	developmental growth	19	0.0608974	0	0
Biological_process	response to endogenous stimulus	3	0.00961538	0	0
Biological_process	female germ-line cyst formation	2	0.00641026	0	0
Biological_process	regulation of biomineral tissue development	0	0	3	0.00704225
Biological_process	nucleotide-sugar biosynthetic process	0	0	2	0.00469484
Molecular_function	RNA polymerase II transcription regulatory region sequence-specific DNA binding transcription factor activity involved in positive regulation of transcription	0	0	7	0.0164319
Biological_process	axon extension	19	0.0608974	0	0
Molecular_function	cysteine-type endopeptidase activity	0	0	5	0.0117371
Cellular_component	endoplasmic reticulum lumen	0	0	3	0.00704225
Biological_process	protein modification by small protein conjugation	0	0	13	0.0305164
Biological_process	positive regulation of biological process	18	0.0576923	55	0.129108
Biological_process	protein palmitoylation	0	0	3	0.00704225
Molecular_function	high mobility group box 1 binding	0	0	7	0.0164319
Biological_process	histone H3-K36 trimethylation	0	0	1	0.00234742
Biological_process	establishment of blood-brain barrier	0	0	9	0.0211268
Molecular_function	protein phosphatase 2A binding	2	0.00641026	0	0
Molecular_function	transferase activity, transferring glycosyl groups	0	0	6	0.0140845
Molecular_function	substrate-specific transmembrane transporter activity	39	0.125	0	0
Biological_process	positive regulation of cell cycle process	0	0	4	0.00938967
Biological_process	regulation of kidney development	0	0	3	0.00704225
Molecular_function	Rho GTPase activator activity	19	0.0608974	0	0
Biological_process	tetrapyrrole metabolic process	3	0.00961538	0	0
Molecular_function	ribonuclease activity	0	0	9	0.0211268
Biological_process	inter-male aggressive behavior	8	0.025641	0	0
Biological_process	cellular response to nutrient levels	0	0	3	0.00704225
Biological_process	lysine catabolic process	0	0	1	0.00234742
Biological_process	peptide metabolic process	4	0.0128205	0	0
Biological_process	muscle cell differentiation	4	0.0128205	0	0
Biological_process	regulation of hippo signaling cascade	0	0	2	0.00469484
Molecular_function	monovalent inorganic cation transmembrane transporter activity	37	0.11859	0	0
Biological_process	regulation of response to stress	0	0	15	0.0352113
Biological_process	regulation of metal ion transport	0	0	5	0.0117371
Biological_process	columnar/cuboidal epithelial cell differentiation	0	0	3	0.00704225
Cellular_component	intracellular	19	0.0608974	0	0
Biological_process	positive regulation of intracellular protein kinase cascade	0	0	0	0
Biological_process	meiotic cytokinesis	4	0.0128205	4	0.00938967
Biological_process	cellular component assembly involved in morphogenesis	0	0	0	0
Biological_process	regulation of cell-substrate adhesion	0	0	4	0.00938967
Biological_process	negative regulation of molecular function	0	0	0	0
Biological_process	cleavage furrow formation	0	0	4	0.00938967
Biological_process	response to organic cyclic compound	39	0.125	0	0
Biological_process	positive regulation of cortisol biosynthetic process	0	0	3	0.00704225
Biological_process	macromolecule catabolic process	0	0	36	0.084507
Biological_process	carbohydrate metabolic process	2	0.00641026	0	0
Biological_process	spindle assembly checkpoint	0	0	2	0.00469484
Biological_process	apical constriction	4	0.0128205	0	0
Biological_process	neuron migration	0	0	5	0.0117371
Biological_process	chemosensory behavior	0	0	12	0.028169
Molecular_function	purine nucleoside binding	12	0.0384615	65	0.152582
Molecular_function	ribonucleoside binding	12	0.0384615	65	0.152582
Biological_process	regulation of antibacterial peptide production	0	0	7	0.0164319
Biological_process	apoptotic process	0	0	0	0
Biological_process	actin filament-based process	0	0	18	0.0422535
Biological_process	positive regulation of ion transmembrane transporter activity	0	0	5	0.0117371
Biological_process	centrosome separation	2	0.00641026	0	0
Biological_process	muscle cell development	0	0	6	0.0140845
Biological_process	activation of Rho GTPase activity	19	0.0608974	0	0
Biological_process	response to temperature stimulus	0	0	12	0.028169
Biological_process	chorion development	5	0.0160256	0	0
Biological_process	regulation of humoral immune response	0	0	7	0.0164319
Biological_process	skeletal muscle cell differentiation	4	0.0128205	0	0
Biological_process	regulation of biosynthetic process of antibacterial peptides active against Gram-negative bacteria	0	0	7	0.0164319
Biological_process	positive regulation of insulin secretion	2	0.00641026	0	0
Biological_process	nucleosome disassembly	0	0	2	0.00469484
Molecular_function	protein-lysine N-methyltransferase activity	0	0	6	0.0140845
Biological_process	CUT catabolic process	0	0	1	0.00234742
Biological_process	heart development	0	0	7	0.0164319
Biological_process	positive regulation of cellular protein metabolic process	2	0.00641026	12	0.028169
Molecular_function	metal ion transmembrane transporter activity	39	0.125	0	0
Biological_process	RNA phosphodiester bond hydrolysis	0	0	3	0.00704225
Biological_process	regulation of kinase activity	0	0	0	0
Molecular_function	RNA polymerase II regulatory region DNA binding	0	0	8	0.0187793
Biological_process	positive regulation of meiosis	0	0	3	0.00704225
Biological_process	lung morphogenesis	0	0	4	0.00938967
Biological_process	transmembrane transport	42	0.134615	0	0
Molecular_function	exonuclease activity, active with either ribo- or deoxyribonucleic acids and producing 5'-phosphomonoesters	0	0	3	0.00704225
Biological_process	epithelial cell migration	0	0	12	0.028169
Biological_process	gamete generation	0	0	18	0.0422535
Biological_process	G-protein coupled receptor signaling pathway	0	0	0	0
Biological_process	dorsal appendage formation	0	0	12	0.028169
Biological_process	organic cyclic compound catabolic process	0	0	37	0.0868545
Molecular_function	nucleoside-triphosphatase regulator activity	29	0.0929487	2	0.00469484
Biological_process	cellularization	6	0.0192308	12	0.028169
Biological_process	nucleobase-containing compound catabolic process	0	0	36	0.084507
Cellular_component	cleavage furrow	4	0.0128205	0	0
Biological_process	anatomical structure arrangement	0	0	5	0.0117371
Biological_process	synaptic vesicle budding	0	0	12	0.028169
Biological_process	stem cell fate commitment	7	0.0224359	0	0
Biological_process	response to DNA damage stimulus	0	0	11	0.0258216
Molecular_function	cation channel activity	39	0.125	0	0
Biological_process	nitrogen compound metabolic process	38	0.121795	88	0.206573
Biological_process	regulation of protein glycosylation	2	0.00641026	0	0
Biological_process	cell projection morphogenesis	1	0.00320513	3	0.00704225
Biological_process	establishment of protein localization to plasma membrane	0	0	3	0.00704225
Biological_process	dendrite morphogenesis	0	0	0	0
Biological_process	cell-cell junction organization	13	0.0416667	21	0.0492958
Cellular_component	death-inducing signaling complex	0	0	1	0.00234742
Biological_process	regulation of keratinocyte differentiation	0	0	1	0.00234742
Biological_process	anterior/posterior pattern specification	0	0	7	0.0164319
Biological_process	regulation of GTP catabolic process	22	0.0705128	0	0
Biological_process	androgen biosynthetic process	0	0	3	0.00704225
Molecular_function	purine NTP-dependent helicase activity	0	0	7	0.0164319
Biological_process	protein stabilization	0	0	6	0.0140845
Biological_process	regulation of actin cytoskeleton organization	0	0	17	0.0399061
Biological_process	negative regulation of Ras protein signal transduction	7	0.0224359	0	0
Biological_process	protein alkylation	0	0	5	0.0117371
Biological_process	mesodermal cell fate specification	0	0	7	0.0164319
Biological_process	positive regulation of MAP kinase activity	0	0	4	0.00938967
Biological_process	border follicle cell migration	0	0	12	0.028169
Biological_process	cellular response to oxidative stress	8	0.025641	0	0
Biological_process	response to drug	36	0.115385	0	0
Biological_process	chromosome organization	0	0	21	0.0492958
Biological_process	regulation of short-term neuronal synaptic plasticity	0	0	12	0.028169
Biological_process	ectoderm development	0	0	7	0.0164319
Cellular_component	protein complex	87	0.278846	0	0
Biological_process	male gonad development	0	0	3	0.00704225
Biological_process	cuticle development	0	0	9	0.0211268
Biological_process	negative regulation of transcription from RNA polymerase III promoter	1	0.00320513	0	0
Molecular_function	protein binding	0	0	60	0.140845
Cellular_component	adherens junction	17	0.0544872	0	0
Biological_process	metabolic process	57	0.182692	124	0.29108
Biological_process	circadian rhythm	0	0	0	0
Biological_process	meiotic spindle organization	2	0.00641026	0	0
Biological_process	regulation of cellular ketone metabolic process	0	0	3	0.00704225
Biological_process	dosage compensation	0	0	3	0.00704225
Biological_process	melanization defense response	5	0.0160256	7	0.0164319
Biological_process	positive regulation of macromolecule metabolic process	11	0.0352564	33	0.0774648
Biological_process	cytoplasmic sequestering of protein	0	0	2	0.00469484
Biological_process	male mating behavior	36	0.115385	0	0
Molecular_function	signaling adaptor activity	0	0	4	0.00938967
Biological_process	regulation of sodium ion transmembrane transporter activity	0	0	5	0.0117371
Biological_process	protein phosphorylation	0	0	15	0.0352113
Biological_process	positive regulation of transport	2	0.00641026	0	0
Cellular_component	organelle	0	0	126	0.295775
Biological_process	epithelial to mesenchymal transition	0	0	3	0.00704225
Biological_process	phosphate-containing compound metabolic process	14	0.0448718	36	0.084507
Biological_process	dosage compensation by inactivation of X chromosome	0	0	3	0.00704225
Biological_process	negative regulation of antigen receptor-mediated signaling pathway	1	0.00320513	0	0
Biological_process	protein-DNA complex subunit organization	3	0.00961538	3	0.00704225
Biological_process	growth	19	0.0608974	0	0
Cellular_component	spindle	19	0.0608974	4	0.00938967
Biological_process	primary metabolic process	44	0.141026	121	0.284038
Biological_process	negative regulation of proteasomal ubiquitin-dependent protein catabolic process	0	0	6	0.0140845
Biological_process	spermatogenesis	8	0.025641	0	0
Biological_process	ribonucleoside metabolic process	0	0	15	0.0352113
Biological_process	nucleoside phosphate metabolic process	0	0	19	0.0446009
Biological_process	mitosis	0	0	11	0.0258216
Biological_process	cell differentiation involved in metanephros development	0	0	3	0.00704225
Biological_process	regulation of protein catabolic process	0	0	7	0.0164319
Biological_process	response to nitrogen compound	1	0.00320513	0	0
Biological_process	positive regulation of rubidium ion transmembrane transporter activity	0	0	5	0.0117371
Molecular_function	primary active transmembrane transporter activity	0	0	15	0.0352113
Biological_process	regulation of neurogenesis	1	0.00320513	0	0
Biological_process	cell junction maintenance	13	0.0416667	12	0.028169
Biological_process	heterocycle metabolic process	34	0.108974	87	0.204225
Biological_process	maintenance of protein location in cell	4	0.0128205	0	0
Molecular_function	serine-type peptidase activity	5	0.0160256	0	0
Biological_process	regulation of proteolysis	0	0	6	0.0140845
Biological_process	organic substance biosynthetic process	21	0.0673077	54	0.126761
Biological_process	histone H3-K9 methylation	0	0	4	0.00938967
Biological_process	RNA 3'-end processing	0	0	8	0.0187793
Biological_process	single-organism behavior	45	0.144231	0	0
Biological_process	ribonucleoprotein complex biogenesis	0	0	2	0.00469484
Biological_process	regulation of RNA splicing	0	0	7	0.0164319
Biological_process	intrinsic apoptotic signaling pathway	0	0	6	0.0140845
Biological_process	CUT metabolic process	0	0	1	0.00234742
Biological_process	positive regulation of sodium ion transport	0	0	5	0.0117371
Biological_process	cell development	23	0.0737179	29	0.0680751
Biological_process	chemotaxis	3	0.00961538	0	0
Biological_process	negative regulation of microtubule depolymerization	16	0.0512821	0	0
Biological_process	chorio-allantoic fusion	5	0.0160256	0	0
Biological_process	positive regulation of protein phosphorylation	0	0	10	0.0234742
Molecular_function	carbon-nitrogen lyase activity	4	0.0128205	0	0
Biological_process	pseudocleavage	4	0.0128205	0	0
Biological_process	imaginal disc-derived wing morphogenesis	14	0.0448718	0	0
Molecular_function	sodium channel activity	36	0.115385	0	0
Biological_process	plus-end directed microtubule sliding	1	0.00320513	0	0
Biological_process	circulatory system process	0	0	9	0.0211268
Biological_process	regulation of Notch signaling pathway	0	0	12	0.028169
Biological_process	secondary metabolic process	5	0.0160256	7	0.0164319
Biological_process	2'-deoxyribonucleotide metabolic process	2	0.00641026	0	0
Biological_process	organonitrogen compound catabolic process	0	0	17	0.0399061
Biological_process	multicellular organismal process	63	0.201923	0	0
Biological_process	melanosome transport	0	0	2	0.00469484
Molecular_function	monooxygenase activity	4	0.0128205	0	0
Biological_process	regulation of cellular amide metabolic process	0	0	7	0.0164319
Biological_process	protein K11-linked ubiquitination	0	0	2	0.00469484
Molecular_function	enzyme activator activity	28	0.0897436	0	0
Molecular_function	poly(A)-specific ribonuclease activity	0	0	2	0.00469484
Biological_process	regulation of NF-kappaB import into nucleus	0	0	1	0.00234742
Molecular_function	methyltransferase activity	0	0	6	0.0140845
Biological_process	organelle organization	46	0.147436	50	0.117371
Biological_process	post-embryonic morphogenesis	14	0.0448718	0	0
Biological_process	positive regulation of homeostatic process	2	0.00641026	0	0
Biological_process	positive regulation of aldosterone biosynthetic process	0	0	3	0.00704225
Biological_process	immune system process	0	0	16	0.0375587
Biological_process	pre-miRNA processing	0	0	2	0.00469484
Biological_process	cellular catabolic process	5	0.0160256	53	0.124413
Biological_process	miRNA metabolic process	0	0	2	0.00469484
Biological_process	regulation of developmental process	5	0.0160256	0	0
Molecular_function	structural molecule activity	0	0	14	0.0328638
Molecular_function	telomeric DNA binding	0	0	4	0.00938967
Molecular_function	acetylglucosaminyltransferase activity	0	0	6	0.0140845
Biological_process	regulation of ion transmembrane transporter activity	0	0	5	0.0117371
Biological_process	regulation of purine nucleotide metabolic process	22	0.0705128	0	0
Biological_process	protein complex assembly	0	0	2	0.00469484
Biological_process	cell surface receptor signaling pathway	10	0.0320513	0	0
Biological_process	regulation of immune response	0	0	7	0.0164319
Biological_process	negative regulation of ubiquitin-protein ligase activity involved in mitotic cell cycle	0	0	2	0.00469484
Biological_process	response to decreased oxygen levels	36	0.115385	0	0
Biological_process	behavioral response to nutrient	0	0	12	0.028169
Biological_process	limb morphogenesis	7	0.0224359	0	0
Molecular_function	MAP kinase phosphatase activity	1	0.00320513	0	0
Biological_process	purine nucleoside triphosphate metabolic process	0	0	15	0.0352113
Biological_process	ovarian follicle cell migration	0	0	12	0.028169
Biological_process	negative regulation of lipid biosynthetic process	0	0	3	0.00704225
Biological_process	protein targeting	0	0	9	0.0211268
Biological_process	guanosine-containing compound metabolic process	0	0	12	0.028169
Molecular_function	phospholipid-translocating ATPase activity	0	0	15	0.0352113
Biological_process	regulation of synaptic plasticity	0	0	12	0.028169
Biological_process	peptidyl-lysine acetylation	0	0	6	0.0140845
Biological_process	reproductive behavior	36	0.115385	0	0
Molecular_function	protein dimerization activity	1	0.00320513	0	0
Biological_process	regulation of primary metabolic process	0	0	72	0.169014
Cellular_component	tight junction	0	0	5	0.0117371
Cellular_component	cytosolic part	0	0	6	0.0140845
Biological_process	positive regulation of JUN kinase activity	0	0	4	0.00938967
Molecular_function	UDP-glycosyltransferase activity	0	0	6	0.0140845
Biological_process	ion homeostasis	37	0.11859	0	0
Biological_process	regulation of muscle adaptation	2	0.00641026	0	0
Biological_process	activation of MAPK activity	0	0	4	0.00938967
Biological_process	negative regulation of lipid metabolic process	0	0	3	0.00704225
Biological_process	positive regulation of peptide secretion	2	0.00641026	0	0
Biological_process	positive regulation of multicellular organismal metabolic process	0	0	3	0.00704225
Biological_process	cellular response to endogenous stimulus	0	0	0	0
Biological_process	membrane depolarization	36	0.115385	0	0
Biological_process	positive regulation of calcium ion transport into cytosol	2	0.00641026	0	0
Biological_process	positive regulation of cell killing	2	0.00641026	0	0
Molecular_function	phospholipid binding	0	0	0	0
Biological_process	oogenesis	1	0.00320513	0	0
Biological_process	regulation of collagen biosynthetic process	0	0	3	0.00704225
Molecular_function	pyrophosphatase activity	0	0	42	0.0985915
Molecular_function	voltage-gated ion channel activity	37	0.11859	0	0
Biological_process	regulation of steroid metabolic process	0	0	3	0.00704225
Biological_process	glycogen metabolic process	2	0.00641026	0	0
Biological_process	negative regulation of cellular catabolic process	0	0	6	0.0140845
Biological_process	synaptic transmission	38	0.121795	0	0
Biological_process	negative regulation of carbohydrate metabolic process	2	0.00641026	0	0
Biological_process	negative regulation of microtubule polymerization or depolymerization	16	0.0512821	0	0
Biological_process	positive regulation of glucocorticoid biosynthetic process	0	0	3	0.00704225
Biological_process	activation of protein kinase activity	0	0	4	0.00938967
Molecular_function	serine hydrolase activity	5	0.0160256	0	0
Biological_process	regulation of actin filament bundle assembly	0	0	4	0.00938967
Biological_process	tissue morphogenesis	0	0	25	0.0586854
Biological_process	cell differentiation involved in kidney development	0	0	3	0.00704225
Biological_process	negative regulation of cell proliferation	0	0	0	0
Biological_process	synapse organization	0	0	0	0
Biological_process	positive regulation of Rho GTPase activity	19	0.0608974	0	0
Biological_process	organophosphate biosynthetic process	0	0	0	0
Biological_process	T cell differentiation	0	0	3	0.00704225
Cellular_component	microtubule organizing center	33	0.105769	0	0
Biological_process	cellular response to oxygen-containing compound	0	0	0	0
Cellular_component	sodium channel complex	36	0.115385	0	0
Molecular_function	voltage-gated channel activity	37	0.11859	0	0
Biological_process	androgen metabolic process	0	0	3	0.00704225
Molecular_function	hydrolase activity, acting on ester bonds	0	0	16	0.0375587
Biological_process	synaptic vesicle budding from presynaptic membrane	0	0	12	0.028169
Molecular_function	nucleotide binding	22	0.0705128	74	0.173709
Cellular_component	anchoring junction	17	0.0544872	0	0
Biological_process	retrograde transport, endosome to Golgi	0	0	2	0.00469484
Molecular_function	Ras GTPase activator activity	19	0.0608974	0	0
Cellular_component	Cdc48p-Npl4p-Ufd1p AAA ATPase complex	0	0	1	0.00234742
Biological_process	negative regulation of ubiquitin-protein ligase activity	0	0	2	0.00469484
Biological_process	Kupffer's vesicle development	0	0	2	0.00469484
Molecular_function	cytokine binding	0	0	7	0.0164319
Biological_process	chromatin-mediated maintenance of transcription	0	0	4	0.00938967
Biological_process	cell migration	1	0.00320513	25	0.0586854
Biological_process	molybdopterin cofactor biosynthetic process	0	0	2	0.00469484
Molecular_function	substrate-specific transporter activity	40	0.128205	0	0
Biological_process	regulation of neuron differentiation	1	0.00320513	0	0
Biological_process	response to heat	0	0	12	0.028169
Molecular_function	thiolester hydrolase activity	0	0	5	0.0117371
Cellular_component	cell projection	5	0.0160256	7	0.0164319
Biological_process	imaginal disc-derived leg morphogenesis	7	0.0224359	0	0
Biological_process	encapsulation of foreign target	5	0.0160256	0	0
Biological_process	regulation of steroid hormone biosynthetic process	0	0	3	0.00704225
Biological_process	homophilic cell adhesion	0	0	0	0
Biological_process	regulation of excretion	3	0.00961538	0	0
Molecular_function	transcription factor binding transcription factor activity	0	0	0	0
Biological_process	renal vesicle formation	0	0	3	0.00704225
Biological_process	organophosphate metabolic process	0	0	21	0.0492958
Biological_process	histone mRNA metabolic process	0	0	3	0.00704225
Biological_process	myotube differentiation	4	0.0128205	0	0
Biological_process	neuron projection extension involved in neuron projection guidance	19	0.0608974	0	0
Biological_process	small molecule biosynthetic process	0	0	0	0
Cellular_component	zonula adherens	13	0.0416667	0	0
Biological_process	neuron projection morphogenesis	1	0.00320513	1	0.00234742
Biological_process	regulation of multicellular organismal development	5	0.0160256	0	0
Biological_process	negative regulation of testosterone biosynthetic process	0	0	3	0.00704225
Biological_process	apoptotic signaling pathway	0	0	9	0.0211268
Biological_process	L-lysine metabolic process	0	0	1	0.00234742
Biological_process	centrosome organization	4	0.0128205	0	0
Biological_process	ossification involved in bone maturation	1	0.00320513	0	0
Molecular_function	JUN kinase binding	0	0	4	0.00938967
Cellular_component	chromatin	0	0	9	0.0211268
Biological_process	regulation of sodium ion transport	0	0	5	0.0117371
Biological_process	cellular nitrogen compound biosynthetic process	0	0	42	0.0985915
Biological_process	sodium ion transmembrane transport	36	0.115385	0	0
Biological_process	regulation of growth	0	0	0	0
Biological_process	histone exchange	3	0.00961538	0	0
Cellular_component	kinesin complex	5	0.0160256	0	0
Biological_process	brain development	0	0	6	0.0140845
Cellular_component	integral to plasma membrane	40	0.128205	0	0
Molecular_function	endoribonuclease activity	0	0	6	0.0140845
Biological_process	protein insertion into ER membrane	0	0	6	0.0140845
Biological_process	regulation of antimicrobial peptide production	0	0	7	0.0164319
Molecular_function	ion transmembrane transporter activity	39	0.125	0	0
Molecular_function	helicase activity	0	0	10	0.0234742
Biological_process	response to mechanical stimulus	36	0.115385	0	0
Cellular_component	cell part	182	0.583333	173	0.406103
Biological_process	germ-line cyst formation	2	0.00641026	0	0
Biological_process	regulation of actin filament-based process	0	0	17	0.0399061
Biological_process	activation of JUN kinase activity	0	0	4	0.00938967
Biological_process	neuron projection guidance	3	0.00961538	0	0
Biological_process	positive regulation of kidney development	0	0	3	0.00704225
Biological_process	proline catabolic process to glutamate	0	0	1	0.00234742
Biological_process	N-acetylglucosamine metabolic process	2	0.00641026	0	0
Biological_process	developmental programmed cell death	0	0	12	0.028169
Molecular_function	sodium ion transmembrane transporter activity	36	0.115385	0	0
Biological_process	purine ribonucleoside catabolic process	0	0	15	0.0352113
Biological_process	nucleoside phosphate catabolic process	0	0	15	0.0352113
Biological_process	locomotory behavior	0	0	0	0
Biological_process	syncytiotrophoblast cell differentiation involved in labyrinthine layer development	5	0.0160256	0	0
Biological_process	regulation of male gonad development	0	0	3	0.00704225
Biological_process	gastrulation	0	0	7	0.0164319
Biological_process	RNA biosynthetic process	0	0	40	0.0938967
Biological_process	pigment metabolic process	8	0.025641	7	0.0164319
Biological_process	mitotic spindle stabilization	1	0.00320513	0	0
Biological_process	melanin metabolic process	5	0.0160256	7	0.0164319
Cellular_component	Golgi apparatus	1	0.00320513	25	0.0586854
Biological_process	regulation of aldosterone biosynthetic process	0	0	3	0.00704225
Biological_process	formin-nucleated actin cable assembly	0	0	4	0.00938967
Molecular_function	peptidylamidoglycolate lyase activity	4	0.0128205	0	0
Biological_process	histone H4-K20 methylation	0	0	4	0.00938967
Biological_process	negative regulation of neuron apoptotic process	8	0.025641	0	0
Biological_process	response to insecticide	36	0.115385	0	0
Biological_process	morphogenesis of an epithelium	0	0	24	0.056338
Biological_process	neuron projection extension	19	0.0608974	0	0
Molecular_function	channel activity	39	0.125	0	0
Molecular_function	copper ion transmembrane transporter activity	0	0	3	0.00704225
Biological_process	maintenance of location in cell	4	0.0128205	0	0
Biological_process	cognition	0	0	12	0.028169
Biological_process	UDP-D-xylose biosynthetic process	0	0	2	0.00469484
Biological_process	regulation of miRNA metabolic process	0	0	2	0.00469484
Biological_process	negative regulation of protein complex disassembly	16	0.0512821	0	0
Biological_process	cation transport	39	0.125	1	0.00234742
Biological_process	organic cyclic compound metabolic process	39	0.125	90	0.211268
Biological_process	methylation	0	0	5	0.0117371
Biological_process	cellular nitrogen compound metabolic process	38	0.121795	84	0.197183
Biological_process	internal protein amino acid acetylation	0	0	6	0.0140845
Biological_process	Mo-molybdopterin cofactor biosynthetic process	0	0	2	0.00469484
Biological_process	compound eye retinal cell programmed cell death	0	0	12	0.028169
Cellular_component	nucleoplasm part	0	0	0	0
Molecular_function	nucleoside-triphosphatase activity	0	0	42	0.0985915
Cellular_component	extracellular vesicular exosome	0	0	19	0.0446009
Biological_process	peptide hormone processing	3	0.00961538	0	0
Biological_process	nucleoside triphosphate metabolic process	0	0	15	0.0352113
Molecular_function	UDP-glucuronate decarboxylase activity	0	0	2	0.00469484
Biological_process	striated muscle cell development	0	0	6	0.0140845
Biological_process	negative regulation of protein depolymerization	16	0.0512821	0	0
Biological_process	reproductive structure development	0	0	0	0
Biological_process	mRNA processing	1	0.00320513	0	0
Biological_process	regulation of response to biotic stimulus	0	0	7	0.0164319
Molecular_function	ion channel activity	39	0.125	0	0
Biological_process	purine nucleoside triphosphate catabolic process	0	0	15	0.0352113
Molecular_function	cysteine-type peptidase activity	0	0	5	0.0117371
Biological_process	system process	8	0.025641	0	0
Molecular_function	cytoskeletal protein binding	19	0.0608974	25	0.0586854
Molecular_function	intracellular cGMP activated cation channel activity	1	0.00320513	0	0
Biological_process	somatic muscle development	0	0	9	0.0211268
Biological_process	septate junction assembly	0	0	9	0.0211268
Biological_process	cellular response to transforming growth factor beta stimulus	0	0	8	0.0187793
Molecular_function	RNA-dependent ATPase activity	0	0	4	0.00938967
Biological_process	chromosome segregation	0	0	7	0.0164319
Molecular_function	protein kinase activity	4	0.0128205	0	0
Biological_process	establishment of synaptic vesicle localization	0	0	12	0.028169
Biological_process	tube formation	0	0	5	0.0117371
Biological_process	cellular component movement	0	0	33	0.0774648
Biological_process	positive regulation of phosphate metabolic process	0	0	0	0
Biological_process	positive regulation of collagen biosynthetic process	0	0	3	0.00704225
Biological_process	positive regulation of hormone metabolic process	0	0	3	0.00704225
Biological_process	regulation of cell killing	2	0.00641026	0	0
Biological_process	protein ubiquitination	0	0	13	0.0305164
Biological_process	monovalent inorganic cation transport	37	0.11859	0	0
Biological_process	cellular membrane organization	0	0	27	0.0633803
Biological_process	protein polyubiquitination	0	0	5	0.0117371
Biological_process	regulation of mRNA splicing, via spliceosome	0	0	7	0.0164319
Biological_process	spectrosome organization	2	0.00641026	0	0
Biological_process	maintenance of protein location	4	0.0128205	0	0
Molecular_function	Rho GTPase binding	4	0.0128205	0	0
Biological_process	reproductive process	52	0.166667	0	0
Molecular_function	small conjugating protein binding	0	0	7	0.0164319
Biological_process	positive regulation of hormone biosynthetic process	0	0	3	0.00704225
Biological_process	neuron development	21	0.0673077	0	0
Molecular_function	phospholipid transporter activity	0	0	15	0.0352113
Biological_process	regulation of alternative mRNA splicing, via spliceosome	0	0	7	0.0164319
Molecular_function	carbon-oxygen lyase activity	0	0	2	0.00469484
Biological_process	epithelial cell-cell adhesion	13	0.0416667	0	0
Biological_process	positive regulation of programmed cell death	0	0	0	0
Cellular_component	transcriptionally active chromatin	0	0	4	0.00938967
Biological_process	positive regulation of cell death	0	0	0	0
Biological_process	BMP signaling pathway	0	0	5	0.0117371
Biological_process	transforming growth factor beta receptor signaling pathway	0	0	5	0.0117371
Molecular_function	tubulin binding	15	0.0480769	12	0.028169
Biological_process	cellular amino acid metabolic process	0	0	0	0
Cellular_component	extracellular region	0	0	0	0
Biological_process	axon choice point recognition	0	0	0	0
Biological_process	regulation of cell proliferation	0	0	0	0
Biological_process	porphyrin-containing compound biosynthetic process	3	0.00961538	0	0
Biological_process	organelle fission	0	0	11	0.0258216
Biological_process	heme metabolic process	3	0.00961538	0	0
Biological_process	male courtship behavior	36	0.115385	0	0
Biological_process	anion transport	0	0	15	0.0352113
Cellular_component	intracellular non-membrane-bounded organelle	51	0.163462	34	0.0798122
Biological_process	positive regulation of gene expression, epigenetic	0	0	4	0.00938967
Biological_process	nonmotile primary cilium assembly	0	0	2	0.00469484
Molecular_function	ubiquitin binding	0	0	7	0.0164319
Biological_process	cell migration involved in vasculogenesis	0	0	1	0.00234742
Molecular_function	protein homodimerization activity	1	0.00320513	0	0
Cellular_component	smooth septate junction	0	0	9	0.0211268
Biological_process	cellular process involved in reproduction in multicellular organism	5	0.0160256	22	0.0516432
Molecular_function	RNA polymerase II core promoter proximal region sequence-specific DNA binding transcription factor activity	0	0	7	0.0164319
Biological_process	protein glycosylation	0	0	6	0.0140845
Molecular_function	anion transmembrane transporter activity	0	0	0	0
Biological_process	regulation of microtubule-based process	16	0.0512821	0	0
Molecular_function	N-acetyllactosaminide beta-1,3-N-acetylglucosaminyltransferase activity	0	0	6	0.0140845
Cellular_component	extracellular membrane-bounded organelle	0	0	19	0.0446009
Biological_process	regulation of synapse organization	0	0	0	0
Biological_process	organophosphate ester transport	0	0	15	0.0352113
Molecular_function	succinyltransferase activity	0	0	1	0.00234742
Biological_process	regulation of response to stimulus	0	0	41	0.0962441
Molecular_function	ion binding	0	0	105	0.246479
Biological_process	regulation of ion transmembrane transport	0	0	5	0.0117371
Biological_process	nuclear-transcribed mRNA catabolic process	0	0	15	0.0352113
Biological_process	regulation of localization	6	0.0192308	0	0
Molecular_function	elongation factor-2 kinase activity	0	0	2	0.00469484
Biological_process	oocyte development	0	0	3	0.00704225
Biological_process	negative regulation of steroid biosynthetic process	0	0	3	0.00704225
Biological_process	positive regulation of intracellular estrogen receptor signaling pathway	0	0	3	0.00704225
Molecular_function	nuclear hormone receptor binding	0	0	4	0.00938967
Biological_process	regulation of intracellular steroid hormone receptor signaling pathway	0	0	4	0.00938967
Biological_process	regulation of hydrolase activity	22	0.0705128	0	0
Biological_process	signaling	38	0.121795	3	0.00704225
Biological_process	negative regulation of metaphase/anaphase transition of cell cycle	0	0	2	0.00469484
Biological_process	cell communication	38	0.121795	3	0.00704225
Biological_process	adult walking behavior	8	0.025641	0	0
Cellular_component	dynactin complex	1	0.00320513	0	0
Molecular_function	frizzled binding	0	0	3	0.00704225
Biological_process	anatomical structure homeostasis	38	0.121795	0	0
Biological_process	regulation of glucocorticoid biosynthetic process	0	0	3	0.00704225
Biological_process	lipid metabolic process	4	0.0128205	3	0.00704225
Biological_process	ribonucleoside triphosphate catabolic process	0	0	15	0.0352113
Biological_process	cellular metabolic process	52	0.166667	123	0.288732
Biological_process	ameboidal cell migration	0	0	12	0.028169
Biological_process	negative regulation of NF-kappaB import into nucleus	0	0	1	0.00234742
Biological_process	regulation of tube size, open tracheal system	0	0	9	0.0211268
Cellular_component	extracellular region part	0	0	24	0.056338
Biological_process	heterocycle catabolic process	0	0	37	0.0868545
Molecular_function	ATPase activity, coupled to transmembrane movement of ions	0	0	15	0.0352113
Biological_process	chitin-based cuticle development	0	0	9	0.0211268
Biological_process	regulation of muscle organ development	0	0	0	0
Molecular_function	passive transmembrane transporter activity	39	0.125	0	0
Cellular_component	spindle pole centrosome	1	0.00320513	1	0.00234742
Molecular_function	substrate-specific channel activity	39	0.125	0	0
Biological_process	regulation of calcium ion transport into cytosol	2	0.00641026	0	0
Biological_process	adult locomotory behavior	8	0.025641	0	0
Molecular_function	chromatin binding	0	0	0	0
Biological_process	establishment or maintenance of cell polarity	0	0	9	0.0211268
Biological_process	neuromuscular process	0	0	0	0
Cellular_component	Cul4-RING ubiquitin ligase complex	3	0.00961538	0	0
Molecular_function	microtubule binding	15	0.0480769	12	0.028169
Biological_process	homeostatic process	39	0.125	4	0.00938967
Biological_process	regulation of cellular metabolic process	0	0	72	0.169014
Molecular_function	signaling receptor activity	2	0.00641026	0	0
Molecular_function	cGMP binding	1	0.00320513	0	0
Biological_process	regulation of antigen receptor-mediated signaling pathway	1	0.00320513	0	0
Molecular_function	small conjugating protein ligase activity	0	0	15	0.0352113
Molecular_function	calcium ion binding	37	0.11859	0	0
Biological_process	ribose phosphate metabolic process	0	0	15	0.0352113
Biological_process	regulation of microtubule polymerization or depolymerization	16	0.0512821	0	0
Biological_process	macromolecule modification	7	0.0224359	54	0.126761
Biological_process	response to transforming growth factor beta stimulus	0	0	8	0.0187793
Biological_process	regulation of protein depolymerization	16	0.0512821	0	0
Biological_process	actin nucleation	4	0.0128205	0	0
Biological_process	purine nucleoside catabolic process	0	0	15	0.0352113
Biological_process	actin cytoskeleton reorganization	4	0.0128205	0	0
Molecular_function	transcription regulatory region DNA binding	0	0	0	0
Biological_process	positive regulation of dermatome development	0	0	3	0.00704225
Biological_process	negative regulation of ligase activity	0	0	2	0.00469484
Biological_process	actin cytoskeleton organization	0	0	18	0.0422535
Biological_process	spindle stabilization	1	0.00320513	0	0
Biological_process	pigment biosynthetic process	3	0.00961538	0	0
Biological_process	kidney epithelium development	0	0	3	0.00704225
Cellular_component	synapse	2	0.00641026	19	0.0446009
Molecular_function	exoribonuclease activity	0	0	3	0.00704225
Biological_process	regulation of GTPase activity	22	0.0705128	0	0
Biological_process	germarium-derived oocyte fate determination	2	0.00641026	0	0
Biological_process	response to oxidative stress	8	0.025641	0	0
Biological_process	male gamete generation	8	0.025641	0	0
Biological_process	regulation of nucleotide catabolic process	22	0.0705128	0	0
Cellular_component	histone acetyltransferase complex	3	0.00961538	0	0
Biological_process	ventral cord development	0	0	7	0.0164319
Molecular_function	magnesium ion binding	0	0	16	0.0375587
Molecular_function	transferase activity, transferring phosphorus-containing groups	4	0.0128205	0	0
Biological_process	cellular ion homeostasis	37	0.11859	0	0
Molecular_function	regulatory region nucleic acid binding	0	0	0	0
Cellular_component	fusome	3	0.00961538	0	0
Biological_process	response to toxic substance	36	0.115385	0	0
Biological_process	negative regulation of fibroblast growth factor receptor signaling pathway	0	0	3	0.00704225
Biological_process	nucleotide metabolic process	0	0	19	0.0446009
Biological_process	positive regulation of actin filament bundle assembly	0	0	3	0.00704225
Biological_process	regulation of systemic arterial blood pressure mediated by a chemical signal	3	0.00961538	0	0
Biological_process	cell adhesion involved in heart morphogenesis	0	0	9	0.0211268
Cellular_component	MCM complex	0	0	2	0.00469484
Biological_process	negative regulation of developmental process	1	0.00320513	0	0
Biological_process	extracellular matrix organization	0	0	12	0.028169
Biological_process	establishment of meiotic spindle localization	0	0	4	0.00938967
Biological_process	programmed cell death	0	0	16	0.0375587
Biological_process	regulation of antimicrobial humoral response	0	0	7	0.0164319
Molecular_function	3',5'-cyclic-GMP phosphodiesterase activity	3	0.00961538	0	0
Biological_process	tetrapyrrole biosynthetic process	3	0.00961538	0	0
Biological_process	mesoderm development	0	0	7	0.0164319
Biological_process	response to oxygen levels	36	0.115385	0	0
Molecular_function	transporter activity	40	0.128205	0	0
Molecular_function	ATPase activity, coupled to transmembrane movement of substances	0	0	15	0.0352113
Biological_process	dATP metabolic process	2	0.00641026	0	0
Biological_process	behavior	53	0.169872	0	0
Molecular_function	hydrolase activity, acting on acid anhydrides, in phosphorus-containing anhydrides	0	0	42	0.0985915
Biological_process	organic cyclic compound biosynthetic process	21	0.0673077	48	0.112676
Biological_process	cell-cell junction maintenance	13	0.0416667	0	0
Molecular_function	lysine N-methyltransferase activity	0	0	6	0.0140845
Biological_process	locomotion	4	0.0128205	31	0.07277
Biological_process	chromatin organization	0	0	14	0.0328638
Molecular_function	lipid binding	0	0	2	0.00469484
Biological_process	catabolic process	6	0.0192308	53	0.124413
Biological_process	response to organic substance	42	0.134615	0	0
Biological_process	cell projection organization	3	0.00961538	4	0.00938967
Biological_process	regulation of G2/M transition of mitotic cell cycle	0	0	2	0.00469484
Biological_process	regulation of catalytic activity	22	0.0705128	0	0
Biological_process	positive regulation of growth hormone secretion	2	0.00641026	0	0
Molecular_function	transmembrane transporter activity	39	0.125	0	0
Biological_process	positive regulation of cell-substrate adhesion	0	0	3	0.00704225
Biological_process	intracellular transport	3	0.00961538	18	0.0422535
Cellular_component	intracellular part	114	0.365385	165	0.387324
Biological_process	cellular chemical homeostasis	37	0.11859	0	0
Biological_process	negative regulation of proteasomal protein catabolic process	0	0	6	0.0140845
Biological_process	protein lipoylation	0	0	1	0.00234742
Biological_process	regulation of aldosterone metabolic process	0	0	3	0.00704225
Biological_process	telomere organization	0	0	4	0.00938967
Biological_process	cellular response to starvation	0	0	3	0.00704225
Biological_process	cGMP metabolic process	3	0.00961538	0	0
Molecular_function	protein binding transcription factor activity	0	0	0	0
Molecular_function	DNA binding	0	0	39	0.0915493
Molecular_function	ligase activity	1	0.00320513	16	0.0375587
Cellular_component	CD95 death-inducing signaling complex	0	0	1	0.00234742
Biological_process	regulation of cell motility	0	0	0	0
Biological_process	multi-organism behavior	0	0	0	0
Molecular_function	endoribonuclease activity, producing 5'-phosphomonoesters	0	0	2	0.00469484
Molecular_function	polyubiquitin binding	0	0	6	0.0140845
Biological_process	retrograde axon cargo transport	1	0.00320513	0	0
Biological_process	regulation of JUN kinase activity	0	0	4	0.00938967
Biological_process	transport	0	0	59	0.138498
Molecular_function	hormone receptor binding	0	0	4	0.00938967
Biological_process	regulation of wound healing	4	0.0128205	3	0.00704225
Biological_process	regulation of locomotion	0	0	0	0
Molecular_function	kinase activity	4	0.0128205	0	0
Biological_process	adult somatic muscle development	0	0	9	0.0211268
Biological_process	establishment of protein localization to membrane	0	0	3	0.00704225
Biological_process	purine nucleotide metabolic process	0	0	15	0.0352113
Molecular_function	gated channel activity	39	0.125	0	0
Biological_process	pore complex assembly	0	0	2	0.00469484
Biological_process	meiosis II cytokinesis	4	0.0128205	0	0
Biological_process	positive regulation of cell junction assembly	0	0	3	0.00704225
Biological_process	phospholipid transport	0	0	15	0.0352113
Molecular_function	ribosome binding	0	0	6	0.0140845
Biological_process	regulation of secretion	0	0	0	0
Biological_process	system development	4	0.0128205	0	0
Biological_process	regulation of neuron apoptotic process	8	0.025641	0	0
Biological_process	cellular protein modification process	7	0.0224359	54	0.126761
Molecular_function	S-adenosylmethionine-dependent methyltransferase activity	0	0	6	0.0140845
Biological_process	regulation of mRNA processing	0	0	8	0.0187793
Biological_process	regulation of transferase activity	0	0	0	0
Biological_process	regulation of phosphorylation	0	0	0	0
Biological_process	short-term memory	0	0	12	0.028169
Biological_process	macromolecule methylation	0	0	5	0.0117371
Biological_process	regulation of transmission of nerve impulse	0	0	12	0.028169
Cellular_component	chromosome, telomeric region	0	0	4	0.00938967
Biological_process	organic anion transport	0	0	15	0.0352113
Cellular_component	intracellular organelle	0	0	124	0.29108
Biological_process	imaginal disc pattern formation	7	0.0224359	0	0
Biological_process	negative regulation of male gonad development	0	0	3	0.00704225
Biological_process	dorsal/ventral pattern formation	7	0.0224359	7	0.0164319
Cellular_component	aster	1	0.00320513	0	0
Molecular_function	RNA polymerase II regulatory region sequence-specific DNA binding	0	0	8	0.0187793
Molecular_function	histone methyltransferase activity (H3-K4 specific)	0	0	4	0.00938967
Biological_process	oviposition	0	0	4	0.00938967
Molecular_function	ubiquitin thiolesterase activity	0	0	5	0.0117371
Cellular_component	cytoplasmic vesicle membrane	0	0	4	0.00938967
Biological_process	regulation of cell cycle process	0	0	10	0.0234742
Biological_process	regulation of cell development	1	0.00320513	0	0
Biological_process	defense response to Gram-positive bacterium	0	0	2	0.00469484
Biological_process	female sex determination	0	0	3	0.00704225
Biological_process	regulation of stress fiber assembly	0	0	4	0.00938967
Biological_process	pole cell formation	5	0.0160256	0	0
Molecular_function	phosphotransferase activity, alcohol group as acceptor	4	0.0128205	0	0
Biological_process	mitotic cytokinesis	4	0.0128205	12	0.028169
Molecular_function	sequence-specific DNA binding	0	0	0	0
Cellular_component	cell-cell junction	13	0.0416667	14	0.0328638
Biological_process	tertiary branching involved in mammary gland duct morphogenesis	0	0	3	0.00704225
Biological_process	positive regulation of bone mineralization	0	0	3	0.00704225
Biological_process	regulation of growth hormone secretion	2	0.00641026	0	0
Biological_process	columnar/cuboidal epithelial cell development	0	0	3	0.00704225
Biological_process	RNA phosphodiester bond hydrolysis, endonucleolytic	0	0	2	0.00469484
Cellular_component	exon-exon junction complex	0	0	7	0.0164319
Molecular_function	zinc ion binding	1	0.00320513	32	0.0751174
Molecular_function	purine ribonucleotide binding	13	0.0416667	65	0.152582
Biological_process	phenol-containing compound metabolic process	5	0.0160256	7	0.0164319
Biological_process	regulation of cell differentiation	1	0.00320513	0	0
Biological_process	positive regulation of rubidium ion transport	0	0	5	0.0117371
Biological_process	in utero embryonic development	0	0	9	0.0211268
Biological_process	sensory organ development	0	0	0	0
Molecular_function	transferase activity, transferring one-carbon groups	0	0	6	0.0140845
Biological_process	positive regulation of developmental process	0	0	0	0
Molecular_function	cation-transporting ATPase activity	0	0	15	0.0352113
Biological_process	adult behavior	9	0.0288462	0	0
Biological_process	cell differentiation involved in embryonic placenta development	5	0.0160256	0	0
Biological_process	negative regulation of androgen biosynthetic process	0	0	3	0.00704225
Biological_process	L-lysine catabolic process to acetyl-CoA	0	0	1	0.00234742
Molecular_function	small GTPase regulator activity	20	0.0641026	0	0
Biological_process	transcription, DNA-dependent	0	0	39	0.0915493
Molecular_function	transcription regulatory region sequence-specific DNA binding	0	0	0	0
Biological_process	epithelial cell morphogenesis	0	0	3	0.00704225
Biological_process	retinal cone cell development	1	0.00320513	0	0
Biological_process	open tracheal system development	0	0	12	0.028169
Biological_process	transcription from RNA polymerase II promoter	0	0	7	0.0164319
Cellular_component	SWI/SNF superfamily-type complex	7	0.0224359	0	0
Biological_process	respiratory system development	0	0	12	0.028169
Biological_process	negative regulation of macromolecule metabolic process	0	0	25	0.0586854
Cellular_component	contractile fiber part	0	0	0	0
Biological_process	ATP-dependent chromatin remodeling	3	0.00961538	0	0
Biological_process	regulation of protein metabolic process	4	0.0128205	25	0.0586854
Cellular_component	neuron part	27	0.0865385	0	0
Biological_process	positive regulation of phosphorus metabolic process	0	0	0	0
Biological_process	spindle midzone assembly involved in mitosis	2	0.00641026	0	0
Biological_process	positive regulation of ossification	0	0	3	0.00704225
Biological_process	purine deoxyribonucleotide metabolic process	2	0.00641026	0	0
Biological_process	death	2	0.00641026	0	0
Biological_process	protein modification by small protein conjugation or removal	0	0	18	0.0422535
Biological_process	positive regulation of protein complex assembly	4	0.0128205	0	0
Biological_process	endocrine process	3	0.00961538	0	0
Biological_process	positive regulation of centrosome duplication	0	0	1	0.00234742
Biological_process	histone mRNA catabolic process	0	0	3	0.00704225
Biological_process	regulation of phosphorus metabolic process	22	0.0705128	0	0
Biological_process	mesenchymal cell differentiation involved in kidney development	0	0	3	0.00704225
Biological_process	Mo-molybdopterin cofactor metabolic process	0	0	2	0.00469484
Cellular_component	nucleolus	8	0.025641	0	0
Biological_process	larval feeding behavior	0	0	12	0.028169
Biological_process	nephron morphogenesis	0	0	3	0.00704225
Biological_process	response to stress	49	0.157051	44	0.103286
Biological_process	female gonad development	0	0	3	0.00704225
Molecular_function	amidine-lyase activity	4	0.0128205	0	0
Biological_process	regulation of membrane potential	37	0.11859	0	0
Biological_process	photoreceptor cell development	21	0.0673077	0	0
Biological_process	neuron recognition	0	0	0	0
Biological_process	RNA metabolic process	19	0.0608974	61	0.143192
Biological_process	positive regulation of cellular metabolic process	11	0.0352564	35	0.0821596
Biological_process	positive regulation of cell differentiation	0	0	0	0
Molecular_function	binding, bridging	0	0	4	0.00938967
Biological_process	ion transmembrane transport	39	0.125	15	0.0352113
Biological_process	negative regulation of catabolic process	0	0	6	0.0140845
Biological_process	negative regulation of neuron death	8	0.025641	0	0
Biological_process	mRNA metabolic process	1	0.00320513	17	0.0399061
Cellular_component	septate junction	0	0	9	0.0211268
Biological_process	regulation of biological quality	46	0.147436	53	0.124413
Cellular_component	spindle pole	3	0.00961538	0	0
Biological_process	chaeta morphogenesis	0	0	3	0.00704225
Biological_process	nuclear-transcribed mRNA catabolic process, nonsense-mediated decay	0	0	7	0.0164319
Cellular_component	nuclear pore outer ring	0	0	2	0.00469484
Biological_process	regulation of mitochondrial depolarization	2	0.00641026	0	0
Biological_process	germ cell migration	0	0	7	0.0164319
Biological_process	regulation of cellular biosynthetic process	22	0.0705128	49	0.115023
Biological_process	kinetochore organization	1	0.00320513	0	0
Biological_process	RNA catabolic process	0	0	20	0.0469484
Molecular_function	phosphatidylinositol phosphate binding	4	0.0128205	0	0
Biological_process	chitin-based embryonic cuticle biosynthetic process	0	0	9	0.0211268
Biological_process	ncRNA catabolic process	0	0	3	0.00704225
Biological_process	wing disc pattern formation	7	0.0224359	0	0
Biological_process	single-organism process	169	0.541667	0	0
Biological_process	intracellular signal transduction	4	0.0128205	0	0
Biological_process	positive regulation of Ras GTPase activity	19	0.0608974	0	0
Biological_process	regulation of peptidyl-threonine phosphorylation	0	0	5	0.0117371
Biological_process	regulation of action potential	36	0.115385	0	0
Biological_process	proteolysis involved in cellular protein catabolic process	0	0	15	0.0352113
Molecular_function	N-methyl-D-aspartate selective glutamate receptor activity	2	0.00641026	0	0
Biological_process	liver development	0	0	3	0.00704225
Biological_process	metanephric nephron development	0	0	3	0.00704225
Biological_process	regulation of RNA biosynthetic process	20	0.0641026	44	0.103286
Biological_process	lymphocyte proliferation	0	0	3	0.00704225
Biological_process	negative regulation of cytoskeleton organization	16	0.0512821	0	0
Biological_process	response to pyrethroid	36	0.115385	0	0
Biological_process	protein insertion into membrane	0	0	6	0.0140845
Biological_process	cell-cell adhesion	18	0.0576923	0	0
Biological_process	maintenance of presynaptic active zone structure	19	0.0608974	0	0
Biological_process	cell junction organization	13	0.0416667	21	0.0492958
Biological_process	synaptic vesicle transport	0	0	12	0.028169
Biological_process	establishment of melanosome localization	0	0	2	0.00469484
Biological_process	negative regulation of small GTPase mediated signal transduction	7	0.0224359	0	0
Biological_process	lysine metabolic process	0	0	1	0.00234742
Biological_process	guanosine-containing compound catabolic process	0	0	12	0.028169
Cellular_component	chromosome	0	0	0	0
Biological_process	regulation of multicellular organismal metabolic process	0	0	3	0.00704225
Biological_process	metanephric tubule formation	0	0	3	0.00704225
Molecular_function	nucleic acid binding	23	0.0737179	48	0.112676
Biological_process	lipid translocation	0	0	15	0.0352113
Biological_process	regulation of transport	5	0.0160256	0	0
Molecular_function	mitogen-activated protein kinase kinase binding	0	0	4	0.00938967
Molecular_function	anion binding	24	0.0769231	65	0.152582
Molecular_function	histone methyltransferase activity (H4-K20 specific)	0	0	4	0.00938967
Cellular_component	cell division site part	4	0.0128205	0	0
Molecular_function	guanyl nucleotide binding	0	0	16	0.0375587
Biological_process	associative learning	0	0	12	0.028169
Biological_process	cellular process	179	0.573718	166	0.389671
Biological_process	regulation of microtubule cytoskeleton organization	16	0.0512821	0	0
Biological_process	lung development	0	0	6	0.0140845
Cellular_component	vesicle membrane	5	0.0160256	4	0.00938967
Biological_process	branchiomotor neuron axon guidance	1	0.00320513	0	0
Molecular_function	ribonucleotide binding	13	0.0416667	65	0.152582
Biological_process	mesenchymal cell differentiation	0	0	3	0.00704225
Biological_process	UDP-D-xylose metabolic process	0	0	2	0.00469484
Biological_process	positive regulation of molecular function	21	0.0673077	0	0
Molecular_function	nucleoside binding	12	0.0384615	65	0.152582
Biological_process	regulation of protein kinase activity	0	0	0	0
Biological_process	pigment granule transport	0	0	2	0.00469484
Biological_process	response to nutrient	0	0	12	0.028169
Biological_process	dorsal closure	0	0	9	0.0211268
Biological_process	actin filament-based movement	4	0.0128205	0	0
Molecular_function	organic cyclic compound binding	40	0.128205	111	0.260563
Cellular_component	plasma membrane	0	0	55	0.129108
Biological_process	positive regulation of biosynthetic process of antibacterial peptides active against Gram-negative bacteria	0	0	7	0.0164319
Biological_process	negative regulation of organelle organization	16	0.0512821	0	0
Biological_process	purine ribonucleoside triphosphate catabolic process	0	0	15	0.0352113
Biological_process	multicellular organismal reproductive behavior	36	0.115385	0	0
Biological_process	regulation of establishment of protein localization to plasma membrane	0	0	5	0.0117371
Molecular_function	secondary active transmembrane transporter activity	0	0	0	0
Biological_process	histone methylation	0	0	5	0.0117371
Biological_process	regulation of macromolecule metabolic process	22	0.0705128	71	0.166667
Molecular_function	voltage-gated cation channel activity	37	0.11859	0	0
Molecular_function	receptor binding	0	0	0	0
Biological_process	phospholipid translocation	0	0	15	0.0352113
Biological_process	hemocyte differentiation	0	0	7	0.0164319
Biological_process	maintenance of imaginal disc-derived wing hair orientation	0	0	9	0.0211268
Cellular_component	cell-cell adherens junction	13	0.0416667	0	0
Molecular_function	sequence-specific DNA binding transcription factor activity	0	0	0	0
Biological_process	regulation of Rho GTPase activity	19	0.0608974	0	0
Biological_process	neuron homeostasis	38	0.121795	0	0
Biological_process	imaginal disc-derived wing margin morphogenesis	7	0.0224359	0	0
Biological_process	regulation of T cell receptor signaling pathway	1	0.00320513	0	0
Molecular_function	transmembrane signaling receptor activity	2	0.00641026	0	0
Biological_process	regulation of bone mineralization	0	0	3	0.00704225
Biological_process	cellular component morphogenesis	1	0.00320513	6	0.0140845
Biological_process	establishment of spindle localization	0	0	5	0.0117371
Biological_process	forebrain development	0	0	5	0.0117371
Biological_process	positive regulation of steroid metabolic process	0	0	3	0.00704225
Biological_process	polar body extrusion after meiotic divisions	0	0	4	0.00938967
Molecular_function	purine ribonucleoside binding	12	0.0384615	65	0.152582
Biological_process	positive regulation of cell communication	0	0	25	0.0586854
Biological_process	signal transduction by p53 class mediator	0	0	6	0.0140845
Cellular_component	cytoplasmic vesicle	0	0	19	0.0446009
Biological_process	learning	0	0	12	0.028169
Biological_process	cortical actin cytoskeleton organization	0	0	12	0.028169
Biological_process	female gamete generation	1	0.00320513	0	0
Biological_process	synaptic vesicle membrane organization	0	0	12	0.028169
Cellular_component	BAT3 complex	0	0	6	0.0140845
Biological_process	oocyte fate determination	2	0.00641026	0	0
Biological_process	establishment of localization in cell	8	0.025641	30	0.0704225
Biological_process	positive regulation of hydrolase activity	21	0.0673077	0	0
Biological_process	response to chemical stimulus	53	0.169872	0	0
Molecular_function	estrogen receptor binding	0	0	4	0.00938967
Biological_process	Toll signaling pathway	0	0	7	0.0164319
Biological_process	positive regulation of protein modification process	0	0	12	0.028169
Biological_process	mitotic spindle assembly checkpoint	0	0	2	0.00469484
Biological_process	negative regulation of steroid metabolic process	0	0	3	0.00704225
Biological_process	nervous system development	0	0	0	0
Biological_process	melanotic encapsulation of foreign target	5	0.0160256	0	0
Biological_process	glucan metabolic process	2	0.00641026	0	0
Biological_process	positive regulation of protein complex disassembly	2	0.00641026	0	0
Biological_process	nucleic acid metabolic process	19	0.0608974	65	0.152582
Molecular_function	G-protein coupled receptor activity	0	0	0	0
Biological_process	regulation of cellular component movement	0	0	0	0
Biological_process	purine ribonucleoside triphosphate metabolic process	0	0	15	0.0352113
Molecular_function	transmembrane receptor protein tyrosine kinase activity	0	0	3	0.00704225
Cellular_component	brahma complex	7	0.0224359	0	0
Molecular_function	myosin-light-chain-phosphatase activity	2	0.00641026	0	0
Biological_process	prosthetic group metabolic process	0	0	2	0.00469484
Biological_process	cortical cytoskeleton organization	19	0.0608974	12	0.028169
Biological_process	regionalization	0	0	16	0.0375587
Biological_process	cellular response to stress	0	0	18	0.0422535
Molecular_function	heterocyclic compound binding	40	0.128205	111	0.260563
Biological_process	kidney development	0	0	9	0.0211268
Biological_process	immune effector process	5	0.0160256	0	0
Cellular_component	membrane-bounded organelle	61	0.195513	109	0.255869
Biological_process	mesonephric epithelium development	0	0	3	0.00704225
Biological_process	embryo development ending in birth or egg hatching	0	0	13	0.0305164
Biological_process	cellular homeostasis	39	0.125	0	0
Biological_process	positive regulation of neuron differentiation	0	0	4	0.00938967
Biological_process	negative regulation of cell death	0	0	0	0
Biological_process	muscle structure development	0	0	9	0.0211268
Biological_process	regulation of hormone metabolic process	0	0	3	0.00704225
Biological_process	primary miRNA processing	0	0	4	0.00938967
Molecular_function	GTPase activity	0	0	13	0.0305164
Biological_process	positive regulation of ion transport	0	0	5	0.0117371
Biological_process	sensory perception	0	0	0	0
Molecular_function	inorganic cation transmembrane transporter activity	39	0.125	3	0.00704225
Biological_process	regulation of gene expression	20	0.0641026	61	0.143192
Biological_process	proboscis extension reflex	0	0	12	0.028169
Biological_process	glycosyl compound catabolic process	0	0	15	0.0352113
Biological_process	positive regulation of reproductive process	0	0	3	0.00704225
Biological_process	regulation of protein complex disassembly	18	0.0576923	0	0
Biological_process	phosphorylation	0	0	0	0
Biological_process	macromolecular complex assembly	0	0	2	0.00469484
Cellular_component	cullin-RING ubiquitin ligase complex	3	0.00961538	0	0
Biological_process	regulation of cellular protein metabolic process	3	0.00961538	25	0.0586854
Molecular_function	oxidoreductase activity, acting on the CH-CH group of donors	3	0.00961538	0	0
Biological_process	post-embryonic appendage morphogenesis	14	0.0448718	0	0
Cellular_component	site of polarized growth	0	0	5	0.0117371
Biological_process	mesenchymal cell differentiation involved in renal system development	0	0	3	0.00704225
Biological_process	regulation of ion homeostasis	5	0.0160256	0	0
Biological_process	positive regulation of signaling	0	0	25	0.0586854
Biological_process	mitotic cell cycle	6	0.0192308	0	0
Molecular_function	MAP-kinase scaffold activity	0	0	4	0.00938967
Biological_process	regulation of defense response	0	0	7	0.0164319
Molecular_function	RNA helicase activity	0	0	3	0.00704225
Molecular_function	nuclease activity	0	0	10	0.0234742
Cellular_component	neuron projection membrane	0	0	4	0.00938967
Biological_process	negative regulation of angiogenesis	0	0	1	0.00234742
Cellular_component	integral to membrane	0	0	38	0.0892019
Biological_process	regulation of nervous system development	1	0.00320513	4	0.00938967
Biological_process	cellular hormone metabolic process	0	0	3	0.00704225
Biological_process	regulation of systemic arterial blood pressure by atrial natriuretic peptide	3	0.00961538	0	0
Biological_process	regulation of defense response to bacterium	0	0	7	0.0164319
Biological_process	positive regulation of stress fiber assembly	0	0	3	0.00704225
Biological_process	positive regulation of metabolic process	11	0.0352564	35	0.0821596
Molecular_function	small molecule binding	22	0.0705128	74	0.173709
Biological_process	regulation of steroid biosynthetic process	0	0	3	0.00704225
Biological_process	regulation of hemocyte proliferation	0	0	7	0.0164319
Cellular_component	microtubule	21	0.0673077	16	0.0375587
Biological_process	regulation of skeletal muscle cell differentiation	0	0	3	0.00704225
Biological_process	somatotropin secreting cell differentiation	0	0	3	0.00704225
Biological_process	proteolysis	0	0	15	0.0352113
Biological_process	aromatic compound catabolic process	0	0	36	0.084507
Biological_process	negative regulation of transcription from RNA polymerase II promoter	0	0	13	0.0305164
Biological_process	DNA metabolic process	0	0	13	0.0305164
Cellular_component	N-methyl-D-aspartate selective glutamate receptor complex	2	0.00641026	0	0
Biological_process	prepulse inhibition	2	0.00641026	0	0
Biological_process	positive regulation of cellular process	17	0.0544872	55	0.129108
Molecular_function	serine-type endopeptidase activity	5	0.0160256	0	0
Molecular_function	ATP-dependent RNA helicase activity	0	0	3	0.00704225
Biological_process	secretion	0	0	0	0
Biological_process	ribonucleotide metabolic process	0	0	15	0.0352113
Molecular_function	transferase activity, transferring hexosyl groups	0	0	6	0.0140845
Biological_process	DNA replication	0	0	6	0.0140845
Biological_process	organophosphate catabolic process	0	0	15	0.0352113
Biological_process	protein methylation	0	0	5	0.0117371
Biological_process	photoreceptor cell differentiation	8	0.025641	0	0
Biological_process	thyroid-stimulating hormone-secreting cell differentiation	0	0	3	0.00704225
Biological_process	single-organism developmental process	0	0	71	0.166667
Biological_process	tissue development	1	0.00320513	11	0.0258216
Biological_process	actomyosin structure organization	6	0.0192308	0	0
Biological_process	regulation of ERBB signaling pathway	7	0.0224359	0	0
Biological_process	response to stimulus	100	0.320513	0	0
Molecular_function	hydrolase activity, acting on acid anhydrides, catalyzing transmembrane movement of substances	0	0	15	0.0352113
Biological_process	chemical homeostasis	37	0.11859	0	0
Biological_process	spindle elongation	15	0.0480769	0	0
Biological_process	developmental cell growth	19	0.0608974	0	0
Cellular_component	cytoplasmic membrane-bounded vesicle	0	0	0	0
Biological_process	axonogenesis	0	0	0	0
Biological_process	nucleobase-containing compound metabolic process	31	0.099359	84	0.197183
Biological_process	protein localization to nucleus	5	0.0160256	0	0
Biological_process	appendage morphogenesis	14	0.0448718	0	0
Biological_process	positive regulation of osteoblast differentiation	0	0	3	0.00704225
Biological_process	intrinsic apoptotic signaling pathway in response to endoplasmic reticulum stress	0	0	6	0.0140845
Biological_process	positive regulation of sodium ion transmembrane transporter activity	0	0	5	0.0117371
Molecular_function	transition metal ion transmembrane transporter activity	0	0	3	0.00704225
Biological_process	ribonucleoside catabolic process	0	0	15	0.0352113
Biological_process	axis specification	0	0	7	0.0164319
Biological_process	enzyme linked receptor protein signaling pathway	1	0.00320513	0	0
Molecular_function	ubiquitin-protein ligase activity	0	0	15	0.0352113
Biological_process	establishment of glial blood-brain barrier	0	0	9	0.0211268
