# Supplementary material for: Genome-Wide Differential DNA Methylation in Reproductive, Morphological, and Visual System Differences Between Queen Bee and Worker Bee (Apis mellifera)
Source: Front Genet. 2020 Aug 7;11:770. doi: 10.3389/fgene.2020.00770 (PMC7438783; doi:10.3389/fgene.2020.00770)
Supplement: TABLE S3 — Differentially Methylated Regions (DMRs) between queen larvae and worker larvae at the age of 5 days. [file Table_3.XLS]

## Sheet: GOStatic
GO Term	GO Sub Term	Hyper Count	Hyper Percentage	Hypo Count	Hypo Percentage
Biological_process	glycosylation	11	0.0190311	0	0
Biological_process	cerebellar cortex structural organization	0	0	5	0.00994036
Molecular_function	inositol hexakisphosphate 3-kinase activity	2	0.00346021	0	0
Biological_process	regulation of organ morphogenesis	0	0	0	0
Molecular_function	protein complex scaffold	6	0.0103806	6	0.0119284
Biological_process	cytoskeleton organization	32	0.0553633	22	0.0437376
Biological_process	cell cycle comprising mitosis without cytokinesis	0	0	2	0.00397614
Molecular_function	Ran GTPase binding	0	0	2	0.00397614
Biological_process	negative regulation of transmembrane receptor protein serine/threonine kinase signaling pathway	0	0	6	0.0119284
Biological_process	extracellular structure organization	18	0.0311419	0	0
Cellular_component	mitochondrial part	0	0	21	0.0417495
Biological_process	negative regulation of epidermal cell differentiation	2	0.00346021	0	0
Molecular_function	phosphatidylinositol-3,4-bisphosphate 4-phosphatase activity	8	0.0138408	0	0
Biological_process	positive regulation of cell proliferation	0	0	0	0
Biological_process	phosphatidic acid biosynthetic process	4	0.00692042	0	0
Biological_process	epithelial cell migration, open tracheal system	12	0.0207612	0	0
Biological_process	maturation of 5.8S rRNA	2	0.00346021	0	0
Biological_process	regulation of blood pressure	4	0.00692042	0	0
Molecular_function	transmembrane receptor protein phosphatase activity	4	0.00692042	0	0
Biological_process	regulation of metabolic process	0	0	77	0.153082
Biological_process	establishment of oocyte nucleus localization involved in oocyte dorsal/ventral axis specification	0	0	2	0.00397614
Cellular_component	synapse part	0	0	19	0.0377734
Biological_process	oocyte microtubule cytoskeleton organization	0	0	2	0.00397614
Biological_process	positive regulation of response to stimulus	0	0	4	0.00795229
Molecular_function	ubiquitin-specific protease activator activity	0	0	2	0.00397614
Biological_process	collagen fibril organization	0	0	2	0.00397614
Biological_process	chromosome condensation	0	0	3	0.00596422
Biological_process	deoxyribonucleotide metabolic process	0	0	2	0.00397614
Biological_process	negative regulation of macrophage derived foam cell differentiation	0	0	2	0.00397614
Molecular_function	cysteine-type endopeptidase inhibitor activity involved in apoptotic process	7	0.0121107	0	0
Biological_process	sexual reproduction	0	0	1	0.00198807
Biological_process	regulation of cardiac muscle adaptation	0	0	2	0.00397614
Biological_process	phosphatidylserine biosynthetic process	0	0	3	0.00596422
Biological_process	nuclear transport	0	0	5	0.00994036
Biological_process	cytokinesis	15	0.0259516	0	0
Cellular_component	endocytic vesicle	0	0	4	0.00795229
Molecular_function	metallochaperone activity	0	0	2	0.00397614
Molecular_function	catalytic activity	139	0.240484	0	0
Biological_process	epithelial cell proliferation involved in renal tubule morphogenesis	0	0	3	0.00596422
Biological_process	thiamine transport	9	0.0155709	0	0
Biological_process	spindle pole body organization	1	0.0017301	0	0
Biological_process	morphogenesis of a polarized epithelium	15	0.0259516	0	0
Biological_process	biomineral tissue development	0	0	3	0.00596422
Biological_process	membrane organization	23	0.0397924	14	0.027833
Molecular_function	ion gated channel activity	0	0	0	0
Biological_process	negative regulation of cell migration	0	0	6	0.0119284
Biological_process	phagocytosis, engulfment	0	0	4	0.00795229
Biological_process	regulation of protein polymerization	9	0.0155709	0	0
Biological_process	necrotic cell death	0	0	2	0.00397614
Biological_process	regulation of transmembrane transporter activity	6	0.0103806	0	0
Biological_process	negative regulation of epithelial cell differentiation	2	0.00346021	0	0
Molecular_function	oxidoreductase activity, acting on the aldehyde or oxo group of donors	0	0	8	0.0159046
Biological_process	regulation of antibacterial peptide biosynthetic process	0	0	2	0.00397614
Molecular_function	N-acetylglucosamine 6-O-sulfotransferase activity	0	0	1	0.00198807
Biological_process	regulation of proteasomal ubiquitin-dependent protein catabolic process	16	0.0276817	0	0
Biological_process	transcription initiation from RNA polymerase II promoter	0	0	5	0.00994036
Biological_process	negative regulation of cardiac muscle adaptation	0	0	2	0.00397614
Biological_process	nuclear pore organization	2	0.00346021	2	0.00397614
Biological_process	termination of signal transduction	3	0.00519031	4	0.00795229
Biological_process	deoxyribonucleoside triphosphate metabolic process	0	0	2	0.00397614
Biological_process	regulation of proteasomal protein catabolic process	16	0.0276817	0	0
Biological_process	regulation of cholesterol transport	0	0	2	0.00397614
Molecular_function	single-stranded RNA binding	0	0	4	0.00795229
Biological_process	regulation of nucleoside metabolic process	15	0.0259516	0	0
Biological_process	Ras protein signal transduction	7	0.0121107	0	0
Molecular_function	monocarboxylic acid binding	3	0.00519031	0	0
Biological_process	cellular protein metabolic process	53	0.0916955	0	0
Molecular_function	beta-1 adrenergic receptor binding	0	0	6	0.0119284
Biological_process	myoblast fusion	0	0	10	0.0198807
Cellular_component	mitotic spindle pole	0	0	3	0.00596422
Biological_process	cellular transition metal ion homeostasis	0	0	2	0.00397614
Biological_process	regulation of cytoplasmic translation	0	0	1	0.00198807
Biological_process	regulation of exocyst localization	7	0.0121107	0	0
Biological_process	positive regulation of cellular amide metabolic process	0	0	2	0.00397614
Molecular_function	oxidoreductase activity	5	0.00865052	0	0
Biological_process	regulation of multicellular organismal process	31	0.0536332	17	0.0337972
Biological_process	reflex	12	0.0207612	0	0
Molecular_function	ATPase activity, coupled	0	0	10	0.0198807
Biological_process	regulation of systemic arterial blood pressure	3	0.00519031	0	0
Biological_process	gland morphogenesis	16	0.0276817	0	0
Biological_process	respiratory gaseous exchange	4	0.00692042	0	0
Biological_process	regulation of lipoprotein lipase activity	0	0	6	0.0119284
Biological_process	adherens junction organization	15	0.0259516	0	0
Biological_process	post-embryonic organ development	9	0.0155709	0	0
Biological_process	histone H3-K4 methylation	0	0	5	0.00994036
Biological_process	regulation of protein phosphorylation	0	0	0	0
Biological_process	lipid transport	0	0	8	0.0159046
Biological_process	ribonucleoside triphosphate metabolic process	14	0.0242215	0	0
Biological_process	calcium ion transport	9	0.0155709	0	0
Molecular_function	phosphatidylinositol kinase activity	2	0.00346021	0	0
Biological_process	regulation of histone H3-K9 trimethylation	0	0	1	0.00198807
Biological_process	bone mineralization	0	0	3	0.00596422
Biological_process	cellular process involved in reproduction	33	0.0570934	0	0
Cellular_component	anaphase-promoting complex	2	0.00346021	0	0
Biological_process	histone demethylation	3	0.00519031	0	0
Biological_process	adherens junction maintenance	12	0.0207612	3	0.00596422
Biological_process	cellular macromolecule catabolic process	0	0	13	0.0258449
Biological_process	endothelial cell development	3	0.00519031	4	0.00795229
Cellular_component	PcG protein complex	3	0.00519031	0	0
Biological_process	axon guidance	28	0.0484429	3	0.00596422
Molecular_function	N-methyltransferase activity	0	0	5	0.00994036
Biological_process	renal filtration	0	0	6	0.0119284
Biological_process	olfactory behavior	12	0.0207612	0	0
Cellular_component	Golgi stack	8	0.0138408	0	0
Biological_process	positive regulation of phosphorylation	16	0.0276817	0	0
Biological_process	cell growth	0	0	15	0.0298211
Molecular_function	histone-lysine N-methyltransferase activity	3	0.00519031	5	0.00994036
Biological_process	tricarboxylic acid cycle	0	0	8	0.0159046
Molecular_function	metallopeptidase activity	0	0	0	0
Cellular_component	lamellar body membrane	0	0	1	0.00198807
Biological_process	reverse cholesterol transport	0	0	2	0.00397614
Molecular_function	acetylgalactosaminyltransferase activity	8	0.0138408	0	0
Biological_process	nuclear pore complex assembly	2	0.00346021	2	0.00397614
Biological_process	multi-multicellular organism process	15	0.0259516	0	0
Biological_process	activation of Ral GTPase activity	7	0.0121107	0	0
Biological_process	sulfur compound transport	9	0.0155709	0	0
Biological_process	antimicrobial humoral response	0	0	0	0
Biological_process	response to extracellular stimulus	25	0.0432526	0	0
Biological_process	single-multicellular organism process	111	0.192042	0	0
Biological_process	regulation of behavior	10	0.017301	0	0
Biological_process	regulation of transporter activity	6	0.0103806	0	0
Biological_process	regulation of macromolecule biosynthetic process	34	0.0588235	52	0.10338
Biological_process	regulation of biosynthetic process	34	0.0588235	55	0.109344
Molecular_function	histone demethylase activity (H4-K20 specific)	3	0.00519031	0	0
Biological_process	regulation of Ral GTPase activity	7	0.0121107	0	0
Biological_process	regulation of sequence-specific DNA binding transcription factor activity	0	0	0	0
Biological_process	regulation of asymmetric cell division	3	0.00519031	4	0.00795229
Biological_process	cell death	0	0	4	0.00795229
Cellular_component	Golgi apparatus part	14	0.0242215	0	0
Biological_process	body morphogenesis	15	0.0259516	0	0
Biological_process	regulation of rubidium ion transmembrane transporter activity	5	0.00865052	0	0
Biological_process	regulation of synaptic vesicle exocytosis	0	0	2	0.00397614
Biological_process	CDP-diacylglycerol metabolic process	0	0	3	0.00596422
Molecular_function	serine-type exopeptidase activity	3	0.00519031	0	0
Biological_process	retinal cell programmed cell death	12	0.0207612	0	0
Biological_process	embryonic axis specification	4	0.00692042	4	0.00795229
Biological_process	organ morphogenesis	0	0	4	0.00795229
Molecular_function	transcription cofactor activity	2	0.00346021	0	0
Biological_process	protein metabolic process	57	0.0986159	0	0
Molecular_function	phosphatase binding	0	0	6	0.0119284
Biological_process	ectodermal cell fate specification	0	0	2	0.00397614
Biological_process	histone lysine methylation	0	0	5	0.00994036
Molecular_function	NAD+ ADP-ribosyltransferase activity	3	0.00519031	0	0
Molecular_function	enzyme inhibitor activity	9	0.0155709	0	0
Molecular_function	transferase activity, transferring pentosyl groups	3	0.00519031	0	0
Molecular_function	co-SMAD binding	0	0	5	0.00994036
Biological_process	regulation of cholesterol biosynthetic process	0	0	2	0.00397614
Biological_process	lens development in camera-type eye	0	0	1	0.00198807
Biological_process	'de novo' protein folding	3	0.00519031	0	0
Biological_process	response to nutrient levels	25	0.0432526	0	0
Molecular_function	Ras guanyl-nucleotide exchange factor activity	0	0	6	0.0119284
Molecular_function	clathrin heavy chain binding	0	0	2	0.00397614
Biological_process	glucose metabolic process	0	0	9	0.0178926
Biological_process	chordate embryonic development	8	0.0138408	11	0.0218688
Biological_process	regulation of actin filament length	9	0.0155709	0	0
Biological_process	cellular response to growth factor stimulus	0	0	11	0.0218688
Biological_process	embryo development	0	0	15	0.0298211
Molecular_function	ATP binding	68	0.117647	0	0
Molecular_function	myosin heavy chain binding	5	0.00865052	0	0
Molecular_function	toxin transporter activity	0	0	2	0.00397614
Biological_process	photoreceptor cell maintenance	3	0.00519031	0	0
Biological_process	positive regulation of metalloenzyme activity	0	0	2	0.00397614
Biological_process	release of sequestered calcium ion into cytosol	9	0.0155709	0	0
Molecular_function	adenyl nucleotide binding	69	0.119377	0	0
Cellular_component	intracellular organelle part	0	0	76	0.151093
Biological_process	negative regulation of muscle adaptation	0	0	2	0.00397614
Biological_process	negative regulation of proteolysis	16	0.0276817	0	0
Biological_process	multicellular organismal development	37	0.0640138	0	0
Cellular_component	endosome	0	0	11	0.0218688
Biological_process	biological regulation	188	0.32526	0	0
Biological_process	regulation of membrane depolarization	0	0	2	0.00397614
Molecular_function	G-protein alpha-subunit binding	3	0.00519031	4	0.00795229
Biological_process	extracellular matrix constituent secretion	4	0.00692042	0	0
Cellular_component	sperm individualization complex	12	0.0207612	0	0
Biological_process	regulation of renal sodium excretion	3	0.00519031	0	0
Molecular_function	transferase activity	75	0.129758	0	0
Biological_process	response to oxygen-containing compound	5	0.00865052	0	0
Biological_process	mitotic cell cycle, embryonic	0	0	2	0.00397614
Biological_process	developmental growth involved in morphogenesis	0	0	0	0
Cellular_component	cell-substrate adherens junction	0	0	0	0
Biological_process	regulation of nucleobase-containing compound metabolic process	46	0.0795848	0	0
Cellular_component	apical part of cell	0	0	5	0.00994036
Cellular_component	vesicle	0	0	38	0.0755467
Biological_process	membrane fission	12	0.0207612	0	0
Biological_process	regulation of membrane lipid distribution	0	0	4	0.00795229
Biological_process	regulation of striated muscle tissue development	0	0	0	0
Biological_process	epithelial cell differentiation involved in kidney development	0	0	3	0.00596422
Molecular_function	mitogen-activated protein kinase kinase kinase binding	4	0.00692042	0	0
Biological_process	ubiquitin-dependent protein catabolic process	0	0	7	0.0139165
Molecular_function	receptor signaling protein activity	0	0	10	0.0198807
Molecular_function	purine ribonucleoside triphosphate binding	80	0.138408	0	0
Cellular_component	primary cilium	5	0.00865052	0	0
Biological_process	negative regulation of protein kinase B signaling cascade	0	0	6	0.0119284
Biological_process	mitochondrion organization	0	0	12	0.0238569
Molecular_function	guanyl ribonucleotide binding	12	0.0207612	0	0
Biological_process	positive regulation of lipid metabolic process	0	0	5	0.00994036
Biological_process	regulation of fertilization	0	0	2	0.00397614
Biological_process	negative regulation of epithelial cell migration	4	0.00692042	0	0
Biological_process	cellular component organization or biogenesis	121	0.209343	0	0
Biological_process	ethanol oxidation	0	0	1	0.00198807
Biological_process	phosphorus metabolic process	63	0.108997	14	0.027833
Biological_process	cell-cell signaling	1	0.0017301	0	0
Molecular_function	transferase activity, transferring acyl groups other than amino-acyl groups	0	0	6	0.0119284
Biological_process	divalent inorganic cation homeostasis	10	0.017301	14	0.027833
Biological_process	glycerophospholipid metabolic process	17	0.0294118	10	0.0198807
Molecular_function	nucleic acid binding transcription factor activity	0	0	7	0.0139165
Biological_process	carboxylic acid metabolic process	0	0	0	0
Biological_process	multi-organism reproductive process	15	0.0259516	0	0
Molecular_function	actin monomer binding	0	0	3	0.00596422
Molecular_function	sequence-specific DNA binding RNA polymerase II transcription factor activity	1	0.0017301	0	0
Molecular_function	copper-dependent protein binding	0	0	2	0.00397614
Cellular_component	eukaryotic translation initiation factor 4F complex	0	0	4	0.00795229
Cellular_component	acrosomal membrane	0	0	2	0.00397614
Molecular_function	type II activin receptor binding	0	0	6	0.0119284
Biological_process	epinephrine metabolic process	0	0	2	0.00397614
Biological_process	organic acid metabolic process	0	0	0	0
Biological_process	magnesium ion homeostasis	0	0	13	0.0258449
Biological_process	positive regulation of steroid biosynthetic process	0	0	2	0.00397614
Biological_process	negative regulation of protein glycosylation	0	0	2	0.00397614
Biological_process	positive regulation of transcription from RNA polymerase II promoter involved in unfolded protein response	2	0.00346021	0	0
Molecular_function	binding	217	0.375433	0	0
Biological_process	cellular developmental process	89	0.153979	0	0
Biological_process	high-density lipoprotein particle remodeling	0	0	2	0.00397614
Molecular_function	mRNA binding	0	0	0	0
Molecular_function	glutamate-ammonia ligase activity	0	0	1	0.00198807
Biological_process	regulation of G-protein coupled receptor protein signaling pathway	0	0	4	0.00795229
Biological_process	eye photoreceptor cell fate commitment	0	0	0	0
Molecular_function	molecular transducer activity	37	0.0640138	0	0
Molecular_function	oxidoreductase activity, acting on the aldehyde or oxo group of donors, disulfide as acceptor	0	0	8	0.0159046
Biological_process	microtubule-based process	5	0.00865052	0	0
Biological_process	cellular metal ion homeostasis	9	0.0155709	0	0
Biological_process	microspike assembly	0	0	3	0.00596422
Biological_process	oligosaccharide biosynthetic process	8	0.0138408	0	0
Biological_process	response to iron(III) ion	0	0	2	0.00397614
Cellular_component	cytoplasm	89	0.153979	74	0.147117
Cellular_component	apical cortex	0	0	4	0.00795229
Biological_process	membrane invagination	0	0	4	0.00795229
Cellular_component	axolemma	4	0.00692042	0	0
Molecular_function	ATP-dependent helicase activity	0	0	5	0.00994036
Biological_process	pyramidal neuron development	0	0	2	0.00397614
Biological_process	olfactory learning	12	0.0207612	0	0
Biological_process	regulation of molecular function	38	0.0657439	0	0
Biological_process	epithelial fluid transport	3	0.00519031	0	0
Biological_process	nucleocytoplasmic transport	0	0	5	0.00994036
Cellular_component	occluding junction	8	0.0138408	0	0
Biological_process	response to starvation	13	0.0224913	0	0
Biological_process	regulation of glycoprotein biosynthetic process	0	0	2	0.00397614
Biological_process	regulation of transcription, DNA-dependent	31	0.0536332	0	0
Biological_process	positive regulation of receptor internalization	0	0	6	0.0119284
Biological_process	regulation of macrophage derived foam cell differentiation	0	0	2	0.00397614
Biological_process	negative regulation of cellular component organization	0	0	0	0
Biological_process	macromolecule glycosylation	11	0.0190311	0	0
Biological_process	regulation of RNA metabolic process	32	0.0553633	0	0
Biological_process	chromatin modification	19	0.032872	0	0
Biological_process	cellular response to organic substance	5	0.00865052	0	0
Biological_process	hair cycle process	0	0	2	0.00397614
Molecular_function	phosphoric ester hydrolase activity	16	0.0276817	0	0
Biological_process	modification-dependent protein catabolic process	0	0	7	0.0139165
Biological_process	startle response	0	0	0	0
Biological_process	mitotic chromosome condensation	0	0	3	0.00596422
Molecular_function	adenyl ribonucleotide binding	68	0.117647	0	0
Biological_process	cellular component organization	121	0.209343	0	0
Cellular_component	intrinsic to plasma membrane	5	0.00865052	1	0.00198807
Biological_process	polarized epithelial cell differentiation	3	0.00519031	0	0
Biological_process	regulation of catabolic process	31	0.0536332	0	0
Molecular_function	protein complex binding	0	0	6	0.0119284
Biological_process	small molecule metabolic process	17	0.0294118	0	0
Biological_process	response to high density lipoprotein particle stimulus	0	0	2	0.00397614
Molecular_function	cation transmembrane transporter activity	10	0.017301	0	0
Biological_process	metal ion homeostasis	10	0.017301	16	0.0318091
Biological_process	regulation of mitochondrion organization	3	0.00519031	0	0
Biological_process	filopodium assembly	0	0	4	0.00795229
Biological_process	O-glycan processing	4	0.00692042	0	0
Molecular_function	oxoglutarate dehydrogenase (succinyl-transferring) activity	0	0	8	0.0159046
Cellular_component	filtration diaphragm	0	0	6	0.0119284
Biological_process	maintenance of apical/basal cell polarity	3	0.00519031	0	0
Molecular_function	phosphatase activity	15	0.0259516	0	0
Cellular_component	intermediate filament	13	0.0224913	0	0
Biological_process	organonitrogen compound biosynthetic process	1	0.0017301	0	0
Biological_process	cystoblast division	2	0.00346021	0	0
Biological_process	regulation of vesicle-mediated transport	0	0	0	0
Biological_process	CDP-diacylglycerol biosynthetic process	0	0	3	0.00596422
Cellular_component	transcription factor complex	0	0	0	0
Cellular_component	condensed chromosome kinetochore	2	0.00346021	2	0.00397614
Biological_process	regulation of chromatin organization	13	0.0224913	0	0
Molecular_function	PDZ domain binding	0	0	6	0.0119284
Cellular_component	SAGA complex	2	0.00346021	0	0
Biological_process	positive regulation of peptide hormone secretion	0	0	2	0.00397614
Biological_process	nucleobase-containing small molecule metabolic process	0	0	4	0.00795229
Biological_process	amyloid precursor protein metabolic process	0	0	2	0.00397614
Biological_process	learning or memory	0	0	0	0
Biological_process	negative regulation of protein catabolic process	16	0.0276817	0	0
Biological_process	mRNA catabolic process	0	0	6	0.0119284
Cellular_component	presynaptic active zone	0	0	13	0.0258449
Biological_process	cell cycle process	30	0.0519031	23	0.0457256
Biological_process	peripheral nervous system neuron development	0	0	2	0.00397614
Biological_process	negative regulation of epidermis development	2	0.00346021	0	0
Biological_process	regulation of cholesterol esterification	0	0	2	0.00397614
Biological_process	positive regulation of mitochondrial depolarization	0	0	2	0.00397614
Molecular_function	transmembrane receptor protein tyrosine phosphatase activity	4	0.00692042	0	0
Biological_process	plasmatocyte differentiation	0	0	2	0.00397614
Biological_process	cellular divalent inorganic cation homeostasis	9	0.0155709	0	0
Biological_process	heme biosynthetic process	0	0	3	0.00596422
Cellular_component	photoreceptor connecting cilium	5	0.00865052	0	0
Biological_process	regulation of tube architecture, open tracheal system	12	0.0207612	0	0
Molecular_function	GTPase activator activity	17	0.0294118	0	0
Molecular_function	signal transducer activity	37	0.0640138	0	0
Molecular_function	intracellular ligand-gated ion channel activity	9	0.0155709	0	0
Biological_process	regulation of gene expression, epigenetic	0	0	8	0.0159046
Cellular_component	extracellular organelle	0	0	28	0.055666
Biological_process	fatty acid homeostasis	9	0.0155709	0	0
Cellular_component	plasma membrane part	0	0	5	0.00994036
Cellular_component	SAGA-type complex	2	0.00346021	0	0
Biological_process	regulation of feeding behavior	9	0.0155709	0	0
Biological_process	macromolecule localization	21	0.0363322	0	0
Cellular_component	trans-Golgi network transport vesicle	0	0	2	0.00397614
Molecular_function	spectrin binding	8	0.0138408	0	0
Biological_process	developmental process involved in reproduction	43	0.0743945	0	0
Biological_process	protein localization to endosome	0	0	4	0.00795229
Biological_process	regulation of rubidium ion transport	5	0.00865052	0	0
Biological_process	phospholipid biosynthetic process	14	0.0242215	8	0.0159046
Biological_process	glycerolipid metabolic process	17	0.0294118	10	0.0198807
Biological_process	positive regulation of protein insertion into mitochondrial membrane involved in apoptotic signaling pathway	3	0.00519031	0	0
Biological_process	nucleoside triphosphate catabolic process	13	0.0224913	0	0
Biological_process	mating behavior	13	0.0224913	0	0
Biological_process	positive regulation of lipid transport	0	0	2	0.00397614
Molecular_function	kinase binding	11	0.0190311	0	0
Molecular_function	1-phosphatidylinositol-4-phosphate 5-kinase activity	0	0	2	0.00397614
Cellular_component	late endosome	0	0	8	0.0159046
Molecular_function	enzyme regulator activity	42	0.0726644	0	0
Biological_process	granzyme-mediated apoptotic signaling pathway	0	0	1	0.00198807
Biological_process	amyloid precursor protein catabolic process	0	0	2	0.00397614
Biological_process	deoxyribose phosphate metabolic process	0	0	2	0.00397614
Molecular_function	protein kinase C binding	3	0.00519031	0	0
Biological_process	lung alveolus development	5	0.00865052	2	0.00397614
Biological_process	clathrin-mediated endocytosis	12	0.0207612	0	0
Biological_process	sex comb development	0	0	2	0.00397614
Molecular_function	opioid peptide activity	2	0.00346021	0	0
Biological_process	negative regulation of glycoprotein biosynthetic process	0	0	2	0.00397614
Biological_process	secretion by cell	0	0	0	0
Cellular_component	spectrosome	2	0.00346021	0	0
Biological_process	response to copper ion	0	0	2	0.00397614
Biological_process	regulation of transmembrane transport	6	0.0103806	0	0
Biological_process	negative regulation of activin receptor signaling pathway	0	0	6	0.0119284
Biological_process	regulation of cell death	0	0	5	0.00994036
Biological_process	miRNA catabolic process	2	0.00346021	0	0
Biological_process	regulation of neuronal synaptic plasticity	12	0.0207612	0	0
Biological_process	regulation of triglyceride biosynthetic process	0	0	3	0.00596422
Biological_process	termination of RNA polymerase III transcription	2	0.00346021	0	0
Cellular_component	mitochondrial membrane	0	0	19	0.0377734
Cellular_component	cytoskeletal part	42	0.0726644	0	0
Biological_process	establishment of vesicle localization	12	0.0207612	0	0
Biological_process	response to fructose stimulus	0	0	3	0.00596422
Cellular_component	postsynaptic membrane	0	0	0	0
Biological_process	regulation of actin filament depolymerization	5	0.00865052	0	0
Biological_process	carbohydrate catabolic process	0	0	9	0.0178926
Molecular_function	histone methyltransferase activity	3	0.00519031	5	0.00994036
Biological_process	sex determination	12	0.0207612	0	0
Molecular_function	protein-DNA loading ATPase activity	0	0	1	0.00198807
Biological_process	aggressive behavior	12	0.0207612	0	0
Biological_process	regulation of muscle cell differentiation	0	0	0	0
Biological_process	negative regulation of programmed cell death	0	0	0	0
Biological_process	testicular fusome organization	2	0.00346021	0	0
Biological_process	positive regulation of transcription from RNA polymerase II promoter involved in cellular response to chemical stimulus	2	0.00346021	0	0
Molecular_function	copper-transporting ATPase activity	0	0	2	0.00397614
Biological_process	regulation of endocytosis	0	0	8	0.0159046
Biological_process	male sex differentiation	12	0.0207612	0	0
Biological_process	embryonic pattern specification	0	0	9	0.0178926
Biological_process	regulation of muscle tissue development	0	0	0	0
Biological_process	GTP catabolic process	12	0.0207612	0	0
Biological_process	catecholamine biosynthetic process	0	0	2	0.00397614
Biological_process	lipid phosphorylation	0	0	4	0.00795229
Biological_process	positive regulation of cellular component organization	0	0	18	0.0357853
Biological_process	hippocampus development	0	0	5	0.00994036
Biological_process	regulation of signal transduction	0	0	13	0.0258449
Biological_process	reproduction	15	0.0259516	0	0
Biological_process	histone H3-K9 demethylation	3	0.00519031	0	0
Cellular_component	spindle midzone	0	0	3	0.00596422
Biological_process	positive regulation of cell projection organization	0	0	10	0.0198807
Biological_process	response to external stimulus	54	0.0934256	10	0.0198807
Molecular_function	chromatin DNA binding	2	0.00346021	0	0
Cellular_component	synaptic membrane	0	0	0	0
Biological_process	response to lipoprotein particle stimulus	0	0	2	0.00397614
Biological_process	regulation of immune system process	2	0.00346021	2	0.00397614
Molecular_function	polypeptide N-acetylgalactosaminyltransferase activity	8	0.0138408	0	0
Biological_process	cell adhesion	12	0.0207612	26	0.0516899
Biological_process	establishment of epithelial cell apical/basal polarity	3	0.00519031	0	0
Biological_process	regulation of retinoic acid receptor signaling pathway	2	0.00346021	0	0
Biological_process	mRNA transport	0	0	8	0.0159046
Biological_process	establishment of organelle localization	12	0.0207612	0	0
Biological_process	primary amino compound metabolic process	0	0	2	0.00397614
Molecular_function	DNA clamp loader activity	0	0	1	0.00198807
Biological_process	flight behavior	9	0.0155709	0	0
Biological_process	positive regulation of signal transduction	0	0	3	0.00596422
Molecular_function	actin binding	18	0.0311419	0	0
Molecular_function	1-phosphatidylinositol-5-phosphate 4-kinase activity	0	0	2	0.00397614
Biological_process	glutamate catabolic process	0	0	1	0.00198807
Biological_process	regulation of purine nucleotide catabolic process	15	0.0259516	0	0
Biological_process	single organism reproductive process	26	0.0449827	0	0
Biological_process	protein modification by small protein removal	0	0	7	0.0139165
Cellular_component	nuclear ubiquitin ligase complex	2	0.00346021	0	0
Biological_process	neurotrophin signaling pathway	0	0	6	0.0119284
Cellular_component	axon	1	0.0017301	0	0
Cellular_component	organelle membrane	0	0	26	0.0516899
Biological_process	regulation of protein oligomerization	3	0.00519031	0	0
Biological_process	DNA-dependent transcription, initiation	0	0	5	0.00994036
Biological_process	actin filament polymerization	4	0.00692042	3	0.00596422
Molecular_function	glycoprotein transporter activity	0	0	2	0.00397614
Biological_process	regulation of anatomical structure size	21	0.0363322	0	0
Molecular_function	thiamine pyrophosphate binding	0	0	8	0.0159046
Biological_process	purine deoxyribonucleoside triphosphate metabolic process	0	0	2	0.00397614
Biological_process	regulation of transcription from RNA polymerase II promoter	13	0.0224913	7	0.0139165
Molecular_function	SMAD binding	0	0	11	0.0218688
Molecular_function	phosphatidylinositol 3-kinase activity	2	0.00346021	0	0
Biological_process	purine ribonucleotide metabolic process	0	0	2	0.00397614
Biological_process	negative regulation of cellular metabolic process	33	0.0570934	0	0
Biological_process	intracellular lipid transport	0	0	2	0.00397614
Biological_process	regulation of cell projection organization	3	0.00519031	0	0
Biological_process	establishment of endothelial barrier	3	0.00519031	4	0.00795229
Biological_process	ethanol metabolic process	0	0	1	0.00198807
Biological_process	positive regulation of establishment of protein localization to plasma membrane	5	0.00865052	0	0
Biological_process	ovarian fusome organization	3	0.00519031	0	0
Biological_process	cellular macromolecule localization	0	0	12	0.0238569
Molecular_function	translation factor activity, nucleic acid binding	0	0	4	0.00795229
Biological_process	alpha-beta T cell differentiation involved in immune response	0	0	2	0.00397614
Molecular_function	vitamin binding	0	0	8	0.0159046
Biological_process	response to iron ion	0	0	2	0.00397614
Molecular_function	MAP kinase kinase kinase activity	0	0	4	0.00795229
Molecular_function	phosphatidylinositol bisphosphate phosphatase activity	8	0.0138408	0	0
Molecular_function	purine nucleotide binding	81	0.140138	0	0
Cellular_component	alveolar lamellar body membrane	0	0	1	0.00198807
Biological_process	purine nucleoside metabolic process	0	0	2	0.00397614
Biological_process	negative regulation of DNA-dependent transcription, elongation	2	0.00346021	0	0
Biological_process	hermaphrodite genitalia development	9	0.0155709	0	0
Molecular_function	protein kinase binding	11	0.0190311	0	0
Cellular_component	centrosome	1	0.0017301	0	0
Cellular_component	membrane part	0	0	54	0.107356
Biological_process	phosphatidylinositol biosynthetic process	10	0.017301	0	0
Biological_process	renal tubule morphogenesis	0	0	3	0.00596422
Molecular_function	phosphate ion transmembrane transporter activity	4	0.00692042	0	0
Biological_process	positive regulation of nucleobase-containing compound metabolic process	12	0.0207612	0	0
Biological_process	erythrocyte differentiation	0	0	3	0.00596422
Molecular_function	activin receptor activity, type II	1	0.0017301	0	0
Biological_process	nephron tubule epithelial cell differentiation	0	0	3	0.00596422
Cellular_component	cilium part	5	0.00865052	0	0
Biological_process	positive regulation of GTPase activity	13	0.0224913	0	0
Biological_process	receptor-mediated endocytosis	12	0.0207612	0	0
Biological_process	glycerophospholipid biosynthetic process	14	0.0242215	8	0.0159046
Biological_process	nematode larval development	26	0.0449827	0	0
Biological_process	negative regulation of cell motility	0	0	6	0.0119284
Biological_process	histone H3-K27 demethylation	3	0.00519031	0	0
Biological_process	female pregnancy	3	0.00519031	0	0
Molecular_function	G-protein gamma-subunit binding	1	0.0017301	0	0
Biological_process	vesicle organization	12	0.0207612	0	0
Biological_process	organic substance catabolic process	0	0	28	0.055666
Biological_process	regulation of systemic arterial blood pressure by hormone	3	0.00519031	0	0
Biological_process	regulation of cysteine-type endopeptidase activity	7	0.0121107	0	0
Molecular_function	nucleoside phosphate binding	85	0.147059	0	0
Biological_process	post-embryonic development	33	0.0570934	9	0.0178926
Molecular_function	activin receptor binding	0	0	6	0.0119284
Biological_process	cellular modified amino acid biosynthetic process	0	0	3	0.00596422
Biological_process	nuclear division	18	0.0311419	10	0.0198807
Biological_process	dorsal/ventral axis specification	0	0	8	0.0159046
Biological_process	lymphatic endothelial cell differentiation	1	0.0017301	0	0
Biological_process	terminal region determination	0	0	5	0.00994036
Biological_process	UFP-specific transcription factor mRNA processing involved in endoplasmic reticulum unfolded protein response	2	0.00346021	0	0
Molecular_function	histone deacetylase binding	9	0.0155709	0	0
Biological_process	protein localization to membrane	0	0	6	0.0119284
Biological_process	nucleobase-containing compound transport	0	0	8	0.0159046
Biological_process	negative regulation of apoptotic process	0	0	0	0
Biological_process	midbrain development	3	0.00519031	0	0
Biological_process	positive regulation of transcription from RNA polymerase II promoter	0	0	2	0.00397614
Biological_process	serotonin metabolic process	0	0	2	0.00397614
Biological_process	lens fiber cell morphogenesis	0	0	1	0.00198807
Molecular_function	histone methyltransferase activity (H3-K9 specific)	0	0	4	0.00795229
Biological_process	regulation of programmed cell death	0	0	5	0.00994036
Biological_process	phosphatidylinositol-3-phosphate biosynthetic process	10	0.017301	0	0
Biological_process	positive regulation of antibacterial peptide biosynthetic process	0	0	2	0.00397614
Biological_process	axon midline choice point recognition	12	0.0207612	0	0
Biological_process	female germline ring canal formation, actin assembly	2	0.00346021	0	0
Molecular_function	endopeptidase inhibitor activity	7	0.0121107	0	0
Biological_process	alpha-amino acid metabolic process	0	0	0	0
Biological_process	response to growth factor stimulus	0	0	11	0.0218688
Biological_process	regulation of neurotransmitter levels	0	0	0	0
Biological_process	membrane budding	12	0.0207612	0	0
Biological_process	zonula adherens maintenance	3	0.00519031	0	0
Cellular_component	organelle outer membrane	0	0	4	0.00795229
Biological_process	monoubiquitinated histone H2A deubiquitination	0	0	2	0.00397614
Biological_process	salivary gland morphogenesis	16	0.0276817	0	0
Biological_process	negative regulation of locomotion	0	0	6	0.0119284
Molecular_function	peptidase inhibitor activity	7	0.0121107	0	0
Biological_process	positive regulation of transporter activity	5	0.00865052	0	0
Biological_process	molting cycle	9	0.0155709	0	0
Biological_process	regulation of cell communication	0	0	17	0.0337972
Cellular_component	ion channel complex	0	0	0	0
Biological_process	elastic fiber assembly	0	0	2	0.00397614
Biological_process	male courtship behavior, veined wing generated song production	12	0.0207612	0	0
Biological_process	anatomical structure development	84	0.145329	0	0
Biological_process	regulation of actin filament polymerization	9	0.0155709	0	0
Biological_process	protein transport	6	0.0103806	0	0
Biological_process	photoreceptor cell fate commitment	0	0	0	0
Biological_process	nucleic acid transport	0	0	8	0.0159046
Biological_process	monosaccharide catabolic process	0	0	9	0.0178926
Molecular_function	protein transporter activity	0	0	4	0.00795229
Biological_process	cellular response to unfolded protein	2	0.00346021	0	0
Biological_process	synaptic vesicle endocytosis	12	0.0207612	0	0
Biological_process	compound eye photoreceptor development	0	0	0	0
Biological_process	GTP metabolic process	12	0.0207612	0	0
Biological_process	positive regulation of antimicrobial peptide biosynthetic process	0	0	2	0.00397614
Biological_process	muscle organ development	12	0.0207612	0	0
Biological_process	regulation of neuron projection development	0	0	10	0.0198807
Molecular_function	hydrolase activity, acting on acid anhydrides	27	0.0467128	0	0
Biological_process	oxoacid metabolic process	0	0	0	0
Biological_process	asymmetric protein localization	5	0.00865052	4	0.00795229
Biological_process	neuron differentiation	0	0	0	0
Molecular_function	glycerol-3-phosphate O-acyltransferase activity	0	0	3	0.00596422
Biological_process	regulation of anatomical structure morphogenesis	5	0.00865052	2	0.00397614
Biological_process	copulation	12	0.0207612	0	0
Biological_process	cell recognition	0	0	0	0
Biological_process	positive regulation of peptidyl-threonine phosphorylation	5	0.00865052	0	0
Biological_process	imaginal disc-derived appendage morphogenesis	0	0	10	0.0198807
Biological_process	regulation of ubiquitin-specific protease activity	0	0	2	0.00397614
Biological_process	protein deubiquitination	0	0	7	0.0139165
Biological_process	glucosamine-containing compound metabolic process	0	0	3	0.00596422
Biological_process	memory	13	0.0224913	0	0
Biological_process	sperm individualization	12	0.0207612	0	0
Biological_process	chromosome separation	2	0.00346021	0	0
Biological_process	cytoplasmic transport	14	0.0242215	16	0.0318091
Biological_process	peptidyl-tyrosine dephosphorylation	4	0.00692042	0	0
Cellular_component	non-membrane-bounded organelle	21	0.0363322	0	0
Cellular_component	spectrin	5	0.00865052	0	0
Biological_process	'de novo' posttranslational protein folding	3	0.00519031	0	0
Molecular_function	peptidase regulator activity	7	0.0121107	0	0
Biological_process	vesicle-mediated transport	0	0	4	0.00795229
Biological_process	cellular copper ion homeostasis	0	0	2	0.00397614
Biological_process	phospholipid metabolic process	17	0.0294118	10	0.0198807
Biological_process	establishment of protein localization	6	0.0103806	0	0
Biological_process	nuclear migration	0	0	2	0.00397614
Cellular_component	protein phosphatase type 2A complex	3	0.00519031	0	0
Biological_process	multicellular organismal reproductive process	38	0.0657439	0	0
Molecular_function	succinate-semialdehyde dehydrogenase binding	0	0	1	0.00198807
Biological_process	germinal center B cell differentiation	0	0	1	0.00198807
Biological_process	dorsal/ventral axon guidance	15	0.0259516	0	0
Biological_process	alpha-beta T cell differentiation	0	0	2	0.00397614
Biological_process	regulation of homeostatic process	12	0.0207612	0	0
Molecular_function	peptidase activity	4	0.00692042	0	0
Biological_process	molting cycle, chitin-based cuticle	9	0.0155709	0	0
Biological_process	feeding behavior	21	0.0363322	0	0
Biological_process	positive regulation of Notch signaling pathway	12	0.0207612	0	0
Biological_process	tyrosine metabolic process	0	0	2	0.00397614
Biological_process	regulation of synaptic growth at neuromuscular junction	0	0	0	0
Biological_process	lipid particle organization	0	0	1	0.00198807
Cellular_component	cation channel complex	0	0	10	0.0198807
Biological_process	porphyrin-containing compound metabolic process	0	0	3	0.00596422
Biological_process	negative regulation of G-protein coupled receptor protein signaling pathway	3	0.00519031	4	0.00795229
Cellular_component	intrinsic to membrane	0	0	42	0.083499
Cellular_component	mitotic spindle midzone	0	0	3	0.00596422
Biological_process	establishment or maintenance of microtubule cytoskeleton polarity	0	0	2	0.00397614
Biological_process	neurotransmitter transport	0	0	0	0
Biological_process	dopamine metabolic process	0	0	2	0.00397614
Biological_process	cell activation involved in immune response	0	0	3	0.00596422
Molecular_function	protein methyltransferase activity	0	0	5	0.00994036
Biological_process	aromatic amino acid family metabolic process	0	0	2	0.00397614
Biological_process	hexose metabolic process	0	0	9	0.0178926
Biological_process	cellular component maintenance	15	0.0259516	0	0
Biological_process	sensory perception of smell	10	0.017301	0	0
Biological_process	regulation of translational termination	0	0	3	0.00596422
Biological_process	negative regulation of chromatin binding	0	0	1	0.00198807
Cellular_component	mitotic spindle	0	0	6	0.0119284
Biological_process	taxis	29	0.050173	3	0.00596422
Biological_process	protein localization to organelle	8	0.0138408	0	0
Biological_process	nucleoside metabolic process	0	0	2	0.00397614
Biological_process	lymphocyte activation involved in immune response	0	0	3	0.00596422
Biological_process	single organism signaling	1	0.0017301	0	0
Biological_process	histone modification	0	0	9	0.0178926
Biological_process	glycosyl compound metabolic process	0	0	2	0.00397614
Molecular_function	GTP binding	12	0.0207612	0	0
Molecular_function	histone demethylase activity (H3-K36 specific)	3	0.00519031	0	0
Biological_process	activation of Ras GTPase activity	7	0.0121107	0	0
Biological_process	regulation of cytoskeleton organization	21	0.0363322	0	0
Biological_process	establishment or maintenance of monopolar cell polarity	3	0.00519031	0	0
Biological_process	larval behavior	21	0.0363322	0	0
Biological_process	regulation of cell division	4	0.00692042	4	0.00795229
Biological_process	calcium ion transport into cytosol	9	0.0155709	0	0
Biological_process	purine ribonucleoside metabolic process	0	0	2	0.00397614
Molecular_function	kinase inhibitor activity	2	0.00346021	0	0
Biological_process	response to activity	0	0	3	0.00596422
Biological_process	modification-dependent macromolecule catabolic process	0	0	7	0.0139165
Molecular_function	GTPase regulator activity	33	0.0570934	0	0
Biological_process	sensory perception of chemical stimulus	10	0.017301	0	0
Biological_process	regulation of developmental growth	0	0	0	0
Biological_process	R7 cell development	0	0	0	0
Biological_process	negative regulation of retinoic acid receptor signaling pathway	2	0.00346021	0	0
Biological_process	cellular response to superoxide	0	0	2	0.00397614
Biological_process	neuron fate commitment	0	0	0	0
Biological_process	CD4-positive, alpha-beta T cell differentiation	0	0	2	0.00397614
Cellular_component	4-aminobutyrate transaminase complex	0	0	1	0.00198807
Biological_process	eye photoreceptor cell development	0	0	0	0
Biological_process	gene expression	0	0	9	0.0178926
Biological_process	regulation of cellular macromolecule biosynthetic process	34	0.0588235	52	0.10338
Biological_process	regulation of sequestering of calcium ion	9	0.0155709	0	0
Biological_process	protein modification process	49	0.0847751	0	0
Molecular_function	polynucleotide 5'-hydroxyl-kinase activity	2	0.00346021	0	0
Molecular_function	kinesin binding	9	0.0155709	0	0
Cellular_component	PR-DUB complex	0	0	2	0.00397614
Molecular_function	regulatory region DNA binding	3	0.00519031	0	0
Molecular_function	cysteine-type endopeptidase regulator activity involved in apoptotic process	7	0.0121107	0	0
Biological_process	regulation of striated muscle cell differentiation	0	0	0	0
Biological_process	amino sugar metabolic process	0	0	3	0.00596422
Cellular_component	Golgi membrane	5	0.00865052	0	0
Biological_process	elastin biosynthetic process	0	0	2	0.00397614
Biological_process	regulation of organelle organization	40	0.0692042	0	0
Biological_process	cell part morphogenesis	34	0.0588235	7	0.0139165
Biological_process	regulation of phosphate metabolic process	32	0.0553633	0	0
Biological_process	phosphatidylinositol phosphorylation	0	0	4	0.00795229
Biological_process	peptidyl-serine phosphorylation	13	0.0224913	0	0
Biological_process	conditioned taste aversion	12	0.0207612	0	0
Biological_process	regulation of cellular catabolic process	31	0.0536332	0	0
Cellular_component	smooth endoplasmic reticulum	4	0.00692042	0	0
Biological_process	organelle assembly	1	0.0017301	0	0
Cellular_component	supraspliceosomal complex	0	0	3	0.00596422
Molecular_function	phosphatidylinositol-4,5-bisphosphate 4-phosphatase activity	8	0.0138408	0	0
Biological_process	nucleoside catabolic process	13	0.0224913	0	0
Biological_process	pattern specification process	7	0.0121107	0	0
Biological_process	developmental process	135	0.233564	0	0
Biological_process	single-organism carbohydrate catabolic process	0	0	9	0.0178926
Biological_process	regulation of synapse structure and activity	12	0.0207612	0	0
Biological_process	neurogenesis	0	0	0	0
Cellular_component	female germline ring canal inner rim	2	0.00346021	0	0
Cellular_component	PTW/PP1 phosphatase complex	2	0.00346021	0	0
Biological_process	drug transport	9	0.0155709	4	0.00795229
Biological_process	regulation of cell morphogenesis involved in differentiation	0	0	0	0
Biological_process	neurological system process	0	0	0	0
Biological_process	monosaccharide metabolic process	0	0	9	0.0178926
Biological_process	negative regulation of cellular protein metabolic process	21	0.0363322	0	0
Molecular_function	transcription coactivator activity	0	0	0	0
Biological_process	glutamine biosynthetic process	0	0	1	0.00198807
Biological_process	protein-cofactor linkage	0	0	1	0.00198807
Biological_process	copper ion homeostasis	0	0	2	0.00397614
Biological_process	ribosome biogenesis	0	0	2	0.00397614
Cellular_component	growth cone	0	0	5	0.00994036
Biological_process	regulation of cysteine-type endopeptidase activity involved in apoptotic process	7	0.0121107	0	0
Biological_process	intracellular protein transport	1	0.0017301	0	0
Biological_process	single-organism biosynthetic process	0	0	0	0
Biological_process	male meiosis I	0	0	1	0.00198807
Biological_process	regulation of translational initiation	0	0	4	0.00795229
Biological_process	norepinephrine biosynthetic process	0	0	2	0.00397614
Biological_process	response to endogenous stimulus	4	0.00692042	20	0.0397614
Biological_process	developmental growth	2	0.00346021	0	0
Biological_process	female germ-line cyst formation	2	0.00346021	0	0
Biological_process	positive regulation of sterol transport	0	0	2	0.00397614
Biological_process	protein ADP-ribosylation	3	0.00519031	0	0
Biological_process	forebrain neuron development	0	0	2	0.00397614
Biological_process	negative regulation of calcium ion transmembrane transporter activity	1	0.0017301	0	0
Molecular_function	cysteine-type endopeptidase activity	0	0	5	0.00994036
Biological_process	histone lysine demethylation	3	0.00519031	0	0
Biological_process	positive regulation of protein exit from endoplasmic reticulum	0	0	4	0.00795229
Biological_process	positive regulation of biological process	49	0.0847751	0	0
Biological_process	protein modification by small protein conjugation	2	0.00346021	0	0
Biological_process	Wnt receptor signaling pathway	0	0	0	0
Molecular_function	high mobility group box 1 binding	0	0	2	0.00397614
Biological_process	divalent metal ion transport	10	0.017301	10	0.0198807
Biological_process	establishment of blood-brain barrier	0	0	4	0.00795229
Molecular_function	histone demethylase activity (H3-K27 specific)	3	0.00519031	0	0
Molecular_function	transferase activity, transferring glycosyl groups	11	0.0190311	0	0
Molecular_function	superoxide dismutase copper chaperone activity	0	0	2	0.00397614
Molecular_function	1-phosphatidylinositol-3-kinase activity	2	0.00346021	0	0
Molecular_function	lipid-transporting ATPase activity	0	0	2	0.00397614
Molecular_function	substrate-specific transmembrane transporter activity	14	0.0242215	0	0
Biological_process	regulation of gliogenesis	2	0.00346021	0	0
Biological_process	tetrapyrrole metabolic process	0	0	3	0.00596422
Biological_process	regulation of translation	0	0	9	0.0178926
Biological_process	ecdysis, chitin-based cuticle	1	0.0017301	0	0
Biological_process	response to monosaccharide stimulus	0	0	3	0.00596422
Molecular_function	ribonuclease activity	4	0.00692042	0	0
Biological_process	inter-male aggressive behavior	0	0	0	0
Cellular_component	cell cortex part	8	0.0138408	0	0
Molecular_function	monovalent inorganic cation transmembrane transporter activity	1	0.0017301	0	0
Biological_process	regulation of hippo signaling cascade	3	0.00519031	0	0
Biological_process	regulation of metal ion transport	6	0.0103806	0	0
Biological_process	regulation of protein insertion into mitochondrial membrane involved in apoptotic signaling pathway	3	0.00519031	0	0
Biological_process	cellular component assembly involved in morphogenesis	0	0	0	0
Biological_process	negative regulation of molecular function	14	0.0242215	0	0
Biological_process	negative regulation of cysteine-type endopeptidase activity	7	0.0121107	0	0
Biological_process	response to organic cyclic compound	0	0	0	0
Biological_process	macromolecule catabolic process	0	0	14	0.027833
Biological_process	detoxification of copper ion	0	0	2	0.00397614
Biological_process	zonula adherens assembly	3	0.00519031	0	0
Biological_process	neuron migration	0	0	5	0.00994036
Molecular_function	purine nucleoside binding	80	0.138408	0	0
Biological_process	negative regulation of metabolic process	37	0.0640138	0	0
Biological_process	chemosensory behavior	12	0.0207612	0	0
Molecular_function	ribonucleoside binding	80	0.138408	0	0
Biological_process	regulation of phosphatase activity	0	0	7	0.0139165
Biological_process	regulation of antibacterial peptide production	0	0	2	0.00397614
Biological_process	apoptotic process	0	0	2	0.00397614
Biological_process	actin filament-based process	31	0.0536332	18	0.0357853
Biological_process	positive regulation of ion transmembrane transporter activity	5	0.00865052	0	0
Cellular_component	sperm flagellum	0	0	2	0.00397614
Biological_process	response to temperature stimulus	15	0.0259516	0	0
Molecular_function	inositol hexakisphosphate 1-kinase activity	2	0.00346021	0	0
Biological_process	chorion development	5	0.00865052	0	0
Biological_process	fusome organization	3	0.00519031	0	0
Biological_process	positive regulation of insulin secretion	0	0	2	0.00397614
Biological_process	regulation of biosynthetic process of antibacterial peptides active against Gram-negative bacteria	0	0	2	0.00397614
Molecular_function	protein-lysine N-methyltransferase activity	3	0.00519031	5	0.00994036
Biological_process	heart development	0	0	0	0
Biological_process	regulation of kinase activity	0	0	0	0
Biological_process	RNA phosphodiester bond hydrolysis	4	0.00692042	0	0
Biological_process	transmembrane transport	3	0.00519031	0	0
Biological_process	lung morphogenesis	4	0.00692042	0	0
Biological_process	epithelial cell migration	12	0.0207612	0	0
Biological_process	gamete generation	26	0.0449827	0	0
Biological_process	dorsal appendage formation	13	0.0224913	0	0
Molecular_function	nucleoside-triphosphatase regulator activity	33	0.0570934	0	0
Biological_process	defense response to virus	3	0.00519031	0	0
Biological_process	cellularization	13	0.0224913	0	0
Biological_process	anatomical structure arrangement	0	0	5	0.00994036
Biological_process	synaptic vesicle budding	12	0.0207612	0	0
Biological_process	response to DNA damage stimulus	14	0.0242215	0	0
Biological_process	nitrogen compound metabolic process	64	0.110727	0	0
Biological_process	regulation of protein glycosylation	0	0	2	0.00397614
Biological_process	pole plasm protein localization	2	0.00346021	0	0
Biological_process	cell projection morphogenesis	34	0.0588235	7	0.0139165
Biological_process	dendrite morphogenesis	0	0	2	0.00397614
Biological_process	azole transport	9	0.0155709	0	0
Biological_process	cell-cell junction organization	18	0.0311419	0	0
Biological_process	regulation of GTP catabolic process	15	0.0259516	0	0
Molecular_function	inositol trisphosphate kinase activity	2	0.00346021	0	0
Molecular_function	purine NTP-dependent helicase activity	0	0	5	0.00994036
Biological_process	regulation of actin cytoskeleton organization	21	0.0363322	0	0
Biological_process	mesodermal cell fate specification	0	0	2	0.00397614
Biological_process	protein alkylation	0	0	5	0.00994036
Biological_process	positive regulation of MAP kinase activity	6	0.0103806	0	0
Biological_process	response to lipid	0	0	0	0
Biological_process	border follicle cell migration	12	0.0207612	0	0
Biological_process	cell cycle	20	0.0346021	0	0
Biological_process	negative regulation of hydrolase activity	8	0.0138408	0	0
Biological_process	response to drug	0	0	0	0
Biological_process	chromosome organization	22	0.0380623	16	0.0318091
Biological_process	regulation of short-term neuronal synaptic plasticity	12	0.0207612	0	0
Biological_process	regulation of metalloenzyme activity	0	0	2	0.00397614
Biological_process	negative regulation of protein complex assembly	5	0.00865052	0	0
Biological_process	positive regulation of lipid biosynthetic process	0	0	5	0.00994036
Molecular_function	1-phosphatidylinositol-4-phosphate 3-kinase activity	2	0.00346021	0	0
Biological_process	copper ion import	0	0	2	0.00397614
Biological_process	circadian rhythm	0	0	0	0
Biological_process	dosage compensation	0	0	3	0.00596422
Biological_process	cellular response to insulin stimulus	0	0	4	0.00795229
Biological_process	melanization defense response	0	0	4	0.00795229
Biological_process	forebrain dorsal/ventral pattern formation	1	0.0017301	0	0
Biological_process	regulation of actin polymerization or depolymerization	9	0.0155709	0	0
Biological_process	male mating behavior	12	0.0207612	0	0
Biological_process	regulation of signaling	0	0	17	0.0337972
Biological_process	positive regulation of synaptic vesicle exocytosis	0	0	2	0.00397614
Biological_process	catechol-containing compound biosynthetic process	0	0	2	0.00397614
Molecular_function	signaling adaptor activity	4	0.00692042	0	0
Biological_process	regulation of sodium ion transmembrane transporter activity	5	0.00865052	0	0
Biological_process	protein phosphorylation	26	0.0449827	2	0.00397614
Biological_process	positive regulation of transport	0	0	16	0.0318091
Cellular_component	DNA-directed RNA polymerase III complex	2	0.00346021	0	0
Biological_process	phosphate-containing compound metabolic process	63	0.108997	14	0.027833
Cellular_component	outer membrane	0	0	4	0.00795229
Biological_process	dosage compensation by inactivation of X chromosome	0	0	3	0.00596422
Biological_process	growth	2	0.00346021	16	0.0318091
Cellular_component	spindle	0	0	6	0.0119284
Cellular_component	cell-substrate junction	0	0	0	0
Biological_process	negative regulation of proteasomal ubiquitin-dependent protein catabolic process	16	0.0276817	0	0
Biological_process	positive regulation of cholesterol biosynthetic process	0	0	2	0.00397614
Biological_process	anion homeostasis	9	0.0155709	0	0
Biological_process	spermatogenesis	21	0.0363322	0	0
Biological_process	ribonucleoside metabolic process	0	0	2	0.00397614
Biological_process	nucleoside phosphate metabolic process	0	0	4	0.00795229
Biological_process	mitosis	0	0	10	0.0198807
Biological_process	regulation of protein catabolic process	16	0.0276817	0	0
Biological_process	positive regulation of rubidium ion transmembrane transporter activity	5	0.00865052	0	0
Molecular_function	dynein binding	5	0.00865052	0	0
Biological_process	response to cadmium ion	0	0	3	0.00596422
Biological_process	cell junction maintenance	15	0.0259516	3	0.00596422
Biological_process	regulation of proteolysis	16	0.0276817	0	0
Biological_process	histone H3-K9 methylation	0	0	4	0.00795229
Biological_process	negative regulation of ERK1 and ERK2 cascade	4	0.00692042	0	0
Cellular_component	microtubule associated complex	2	0.00346021	1	0.00198807
Biological_process	single-organism behavior	0	0	5	0.00994036
Biological_process	negative regulation of Rac protein signal transduction	0	0	1	0.00198807
Biological_process	inositol phosphate-mediated signaling	9	0.0155709	0	0
Biological_process	actin filament capping	5	0.00865052	0	0
Biological_process	ribonucleoprotein complex biogenesis	0	0	2	0.00397614
Biological_process	negative regulation of epithelial cell proliferation	0	0	3	0.00596422
Biological_process	positive regulation of secretion	0	0	0	0
Biological_process	positive regulation of mitochondrion organization	3	0.00519031	0	0
Biological_process	phosphate ion transport	2	0.00346021	0	0
Biological_process	oligosaccharide metabolic process	8	0.0138408	0	0
Biological_process	transition metal ion homeostasis	0	0	12	0.0238569
Biological_process	positive regulation of sodium ion transport	5	0.00865052	0	0
Biological_process	establishment or maintenance of polarity of embryonic epithelium	3	0.00519031	0	0
Biological_process	negative regulation of cation channel activity	1	0.0017301	0	0
Biological_process	male courtship behavior, veined wing vibration	12	0.0207612	0	0
Biological_process	chemotaxis	29	0.050173	3	0.00596422
Biological_process	chorio-allantoic fusion	5	0.00865052	0	0
Biological_process	positive regulation of protein phosphorylation	13	0.0224913	0	0
Biological_process	sensory perception of taste	9	0.0155709	0	0
Molecular_function	acid-ammonia (or amide) ligase activity	0	0	1	0.00198807
Biological_process	establishment of endothelial blood-brain barrier	3	0.00519031	4	0.00795229
Cellular_component	cilium membrane	5	0.00865052	0	0
Biological_process	regulation of Notch signaling pathway	15	0.0259516	0	0
Biological_process	2'-deoxyribonucleotide metabolic process	0	0	2	0.00397614
Biological_process	blood vessel remodeling	0	0	2	0.00397614
Biological_process	genitalia development	10	0.017301	0	0
Molecular_function	glycogenin glucosyltransferase activity	0	0	1	0.00198807
Biological_process	multicellular organismal process	111	0.192042	0	0
Cellular_component	Cajal body	5	0.00865052	0	0
Molecular_function	histone demethylase activity (H3-K9 specific)	3	0.00519031	0	0
Biological_process	negative regulation of catalytic activity	13	0.0224913	0	0
Biological_process	protein K11-linked ubiquitination	2	0.00346021	0	0
Molecular_function	enzyme activator activity	17	0.0294118	0	0
Molecular_function	methyltransferase activity	0	0	8	0.0159046
Biological_process	post-embryonic morphogenesis	0	0	13	0.0258449
Biological_process	positive regulation of homeostatic process	0	0	2	0.00397614
Biological_process	organelle organization	75	0.129758	61	0.121272
Molecular_function	myosin tail binding	5	0.00865052	0	0
Molecular_function	sulfur compound binding	0	0	8	0.0159046
Biological_process	phospholipid homeostasis	0	0	2	0.00397614
Biological_process	tryptophan metabolic process	0	0	2	0.00397614
Molecular_function	Ral GTPase activator activity	7	0.0121107	0	0
Molecular_function	copper-exporting ATPase activity	0	0	2	0.00397614
Biological_process	regulation of developmental process	14	0.0242215	17	0.0337972
Biological_process	syncytial blastoderm mitotic cell cycle	0	0	2	0.00397614
Biological_process	regulation of ion transmembrane transporter activity	6	0.0103806	0	0
Molecular_function	copper chaperone activity	0	0	2	0.00397614
Biological_process	regulation of cellular component biogenesis	0	0	3	0.00596422
Biological_process	negative regulation of ubiquitin-protein ligase activity involved in mitotic cell cycle	2	0.00346021	0	0
Biological_process	response to decreased oxygen levels	0	0	0	0
Cellular_component	membrane-bounded vesicle	0	0	34	0.0675944
Biological_process	behavioral response to nutrient	12	0.0207612	0	0
Biological_process	retina vasculature development in camera-type eye	1	0.0017301	0	0
Molecular_function	protein N-terminus binding	5	0.00865052	0	0
Molecular_function	fatty acid binding	3	0.00519031	0	0
Molecular_function	transmembrane receptor protein serine/threonine kinase binding	0	0	6	0.0119284
Biological_process	purine nucleoside triphosphate metabolic process	14	0.0242215	0	0
Biological_process	ovarian follicle cell migration	12	0.0207612	0	0
Biological_process	regulation of endopeptidase activity	7	0.0121107	0	0
Biological_process	guanosine-containing compound metabolic process	12	0.0207612	0	0
Biological_process	regulation of synaptic plasticity	12	0.0207612	0	0
Cellular_component	tight junction	5	0.00865052	6	0.0119284
Molecular_function	adrenergic receptor binding	0	0	6	0.0119284
Biological_process	T cell differentiation involved in immune response	0	0	2	0.00397614
Biological_process	gonadal mesoderm development	9	0.0155709	0	0
Biological_process	positive regulation of JUN kinase activity	4	0.00692042	0	0
Molecular_function	UDP-glycosyltransferase activity	8	0.0138408	0	0
Biological_process	regulation of muscle adaptation	0	0	2	0.00397614
Biological_process	elevation of cytosolic calcium ion concentration involved in phospholipase C-activating G-protein coupled signaling pathway	9	0.0155709	0	0
Biological_process	ion homeostasis	0	0	19	0.0377734
Biological_process	positive regulation of receptor-mediated endocytosis	0	0	8	0.0159046
Biological_process	activation of MAPK activity	4	0.00692042	0	0
Biological_process	positive regulation of peptide secretion	0	0	2	0.00397614
Biological_process	cellular cation homeostasis	9	0.0155709	0	0
Biological_process	cellular response to endogenous stimulus	0	0	15	0.0298211
Biological_process	regulation of transmembrane receptor protein serine/threonine kinase signaling pathway	0	0	6	0.0119284
Biological_process	positive regulation of cell killing	0	0	2	0.00397614
Biological_process	positive regulation of calcium ion transport into cytosol	0	0	2	0.00397614
Molecular_function	phospholipid binding	0	0	0	0
Biological_process	regulation of oxidative phosphorylation	0	0	2	0.00397614
Biological_process	regulation of lipase activity	0	0	6	0.0119284
Molecular_function	voltage-gated ion channel activity	0	0	0	0
Molecular_function	pyrophosphatase activity	27	0.0467128	0	0
Biological_process	regulation of steroid metabolic process	0	0	2	0.00397614
Biological_process	negative regulation of cellular catabolic process	16	0.0276817	0	0
Biological_process	synaptic transmission	0	0	0	0
Molecular_function	(S)-3-amino-2-methylpropionate transaminase activity	0	0	1	0.00198807
Biological_process	positive regulation of biosynthetic process	11	0.0190311	0	0
Biological_process	germ cell development	10	0.017301	0	0
Biological_process	regulation of actin filament bundle assembly	0	0	3	0.00596422
Biological_process	tissue morphogenesis	16	0.0276817	0	0
Biological_process	cell differentiation involved in kidney development	0	0	3	0.00596422
Biological_process	negative regulation of cell proliferation	0	0	9	0.0178926
Cellular_component	microtubule organizing center	1	0.0017301	13	0.0258449
Biological_process	nerve growth factor signaling pathway	0	0	6	0.0119284
Molecular_function	voltage-gated channel activity	0	0	0	0
Molecular_function	hydrolase activity, acting on ester bonds	24	0.0415225	0	0
Biological_process	plasma lipoprotein particle remodeling	0	0	2	0.00397614
Biological_process	synaptic vesicle budding from presynaptic membrane	12	0.0207612	0	0
Biological_process	cellular calcium ion homeostasis	9	0.0155709	0	0
Molecular_function	nucleotide binding	85	0.147059	0	0
Biological_process	zinc ion homeostasis	0	0	10	0.0198807
Cellular_component	postsynaptic density	0	0	6	0.0119284
Molecular_function	Ras GTPase activator activity	7	0.0121107	0	0
Biological_process	cell cycle arrest	0	0	6	0.0119284
Biological_process	chromatin-mediated maintenance of transcription	0	0	4	0.00795229
Biological_process	regulation of cellular component organization	56	0.0968858	0	0
Biological_process	positive regulation of gene expression	11	0.0190311	0	0
Biological_process	cell morphogenesis involved in Malpighian tubule morphogenesis	3	0.00519031	0	0
Molecular_function	substrate-specific transporter activity	14	0.0242215	0	0
Biological_process	response to heat	15	0.0259516	0	0
Biological_process	histone H4-K20 demethylation	3	0.00519031	0	0
Biological_process	negative regulation of cysteine-type endopeptidase activity involved in apoptotic process	7	0.0121107	0	0
Molecular_function	phosphatidylinositol phosphate phosphatase activity	8	0.0138408	0	0
Molecular_function	thiolester hydrolase activity	0	0	5	0.00994036
Biological_process	establishment or maintenance of polarity of follicular epithelium	6	0.0103806	4	0.00795229
Cellular_component	cell projection	17	0.0294118	0	0
Biological_process	detection of stimulus	0	0	0	0
Biological_process	microtubule-based movement	0	0	0	0
Biological_process	RNA export from nucleus	0	0	3	0.00596422
Biological_process	homophilic cell adhesion	0	0	1	0.00198807
Molecular_function	transcription factor binding transcription factor activity	2	0.00346021	0	0
Cellular_component	nonmotile primary cilium	5	0.00865052	0	0
Biological_process	organophosphate metabolic process	31	0.0536332	0	0
Biological_process	histone mRNA metabolic process	0	0	3	0.00596422
Cellular_component	pronucleus	2	0.00346021	0	0
Biological_process	positive regulation of histone H3-K9 trimethylation	0	0	1	0.00198807
Biological_process	small molecule biosynthetic process	0	0	0	0
Biological_process	positive regulation of cholesterol transport	0	0	2	0.00397614
Biological_process	regulation of voltage-gated calcium channel activity	1	0.0017301	0	0
Biological_process	regulation of sterol transport	0	0	2	0.00397614
Biological_process	neuron projection morphogenesis	33	0.0570934	5	0.00994036
Biological_process	negative regulation of protein polymerization	5	0.00865052	0	0
Biological_process	positive regulation of cholesterol efflux	0	0	2	0.00397614
Biological_process	regulation of multicellular organismal development	12	0.0207612	11	0.0218688
Biological_process	positive regulation of transcription, DNA-dependent	11	0.0190311	0	0
Biological_process	copper ion export	0	0	2	0.00397614
Cellular_component	secretory granule membrane	0	0	3	0.00596422
Cellular_component	slit diaphragm	0	0	6	0.0119284
Cellular_component	chromatin	0	0	11	0.0218688
Molecular_function	JUN kinase binding	4	0.00692042	0	0
Biological_process	regulation of sodium ion transport	5	0.00865052	0	0
Biological_process	regulation of growth	0	0	2	0.00397614
Biological_process	regulation of nitrogen compound metabolic process	46	0.0795848	0	0
Biological_process	cellular nitrogen compound biosynthetic process	32	0.0553633	0	0
Cellular_component	Yb body	1	0.0017301	0	0
Molecular_function	protein serine/threonine kinase activity	44	0.0761246	0	0
Cellular_component	integral to plasma membrane	5	0.00865052	1	0.00198807
Biological_process	mitotic cell cycle arrest	0	0	6	0.0119284
Biological_process	alditol phosphate metabolic process	0	0	3	0.00596422
Biological_process	asymmetric neuroblast division	3	0.00519031	4	0.00795229
Molecular_function	ion transmembrane transporter activity	14	0.0242215	0	0
Molecular_function	helicase activity	5	0.00865052	6	0.0119284
Cellular_component	cell part	230	0.397924	0	0
Biological_process	germ-line cyst formation	2	0.00346021	0	0
Biological_process	regulation of actin filament-based process	21	0.0363322	0	0
Biological_process	activation of JUN kinase activity	4	0.00692042	0	0
Biological_process	neuron projection guidance	28	0.0484429	3	0.00596422
Cellular_component	cell projection membrane	9	0.0155709	0	0
Biological_process	developmental programmed cell death	12	0.0207612	0	0
Biological_process	N-acetylglucosamine metabolic process	0	0	3	0.00596422
Biological_process	protein import into mitochondrial intermembrane space	0	0	1	0.00198807
Biological_process	purine ribonucleoside catabolic process	13	0.0224913	0	0
Molecular_function	sodium ion transmembrane transporter activity	0	0	0	0
Biological_process	negative regulation of cytoplasmic translation	0	0	1	0.00198807
Biological_process	syncytiotrophoblast cell differentiation involved in labyrinthine layer development	5	0.00865052	0	0
Biological_process	central nervous system development	12	0.0207612	0	0
Biological_process	divalent inorganic cation transport	10	0.017301	10	0.0198807
Biological_process	pigment metabolic process	0	0	7	0.0139165
Molecular_function	dopamine beta-monooxygenase activity	1	0.0017301	0	0
Molecular_function	cytoskeletal regulatory protein binding	1	0.0017301	0	0
Biological_process	melanin metabolic process	0	0	4	0.00795229
Molecular_function	peptidase activator activity	0	0	2	0.00397614
Biological_process	regulation of cell morphogenesis	0	0	2	0.00397614
Biological_process	cellular response to chemical stimulus	8	0.0138408	0	0
Molecular_function	activin-activated receptor activity	1	0.0017301	0	0
Cellular_component	COPII vesicle coat	1	0.0017301	0	0
Biological_process	histone H4-K20 methylation	0	0	4	0.00795229
Biological_process	brain morphogenesis	0	0	0	0
Biological_process	morphogenesis of an epithelium	16	0.0276817	0	0
Molecular_function	copper ion transmembrane transporter activity	0	0	2	0.00397614
Biological_process	Golgi organization	5	0.00865052	0	0
Biological_process	cognition	0	0	0	0
Biological_process	methylation	0	0	5	0.00994036
Biological_process	compound eye retinal cell programmed cell death	12	0.0207612	0	0
Cellular_component	nucleoplasm part	0	0	3	0.00596422
Biological_process	axon ensheathment	0	0	4	0.00795229
Molecular_function	nucleoside-triphosphatase activity	27	0.0467128	0	0
Biological_process	SMAD protein signal transduction	0	0	6	0.0119284
Cellular_component	extracellular vesicular exosome	0	0	28	0.055666
Biological_process	peptide hormone processing	3	0.00519031	0	0
Biological_process	nucleoside triphosphate metabolic process	14	0.0242215	0	0
Biological_process	DNA packaging	0	0	3	0.00596422
Molecular_function	growth factor activity	0	0	2	0.00397614
Biological_process	phospholipid efflux	0	0	2	0.00397614
Biological_process	purine nucleoside triphosphate catabolic process	13	0.0224913	0	0
Molecular_function	cysteine-type peptidase activity	0	0	5	0.00994036
Biological_process	system process	0	0	10	0.0198807
Biological_process	regulation of cell shape	0	0	0	0
Molecular_function	cytoskeletal protein binding	28	0.0484429	0	0
Biological_process	calcium ion homeostasis	9	0.0155709	0	0
Biological_process	regulation of cell adhesion mediated by integrin	4	0.00692042	0	0
Biological_process	cellular response to transforming growth factor beta stimulus	0	0	5	0.00994036
Biological_process	CD4-positive, alpha-beta T cell differentiation involved in immune response	0	0	2	0.00397614
Molecular_function	fructose-bisphosphate aldolase activity	0	0	1	0.00198807
Molecular_function	RNA-dependent ATPase activity	0	0	4	0.00795229
Biological_process	chromosome segregation	14	0.0242215	5	0.00994036
Molecular_function	protein kinase activity	46	0.0795848	0	0
Molecular_function	G-protein coupled receptor binding	0	0	6	0.0119284
Cellular_component	protein serine/threonine phosphatase complex	5	0.00865052	0	0
Biological_process	establishment of synaptic vesicle localization	12	0.0207612	0	0
Biological_process	cellular component movement	42	0.0726644	0	0
Biological_process	positive regulation of phosphate metabolic process	16	0.0276817	0	0
Biological_process	negative regulation of actin filament polymerization	5	0.00865052	0	0
Biological_process	olfactory bulb axon guidance	0	0	1	0.00198807
Biological_process	regulation of cell killing	0	0	2	0.00397614
Biological_process	positive regulation of triglyceride biosynthetic process	0	0	3	0.00596422
Biological_process	response to alcohol	0	0	0	0
Biological_process	carbohydrate biosynthetic process	8	0.0138408	0	0
Biological_process	positive regulation of triglyceride metabolic process	0	0	3	0.00596422
Biological_process	monovalent inorganic cation transport	0	0	0	0
Biological_process	positive regulation of phosphoprotein phosphatase activity	0	0	6	0.0119284
Molecular_function	2-hydroxyglutarate dehydrogenase activity	0	0	3	0.00596422
Biological_process	cellular membrane organization	0	0	14	0.027833
Biological_process	regulation of oxidoreductase activity	0	0	2	0.00397614
Biological_process	G1 to G0 transition	2	0.00346021	0	0
Biological_process	oocyte nucleus migration involved in oocyte dorsal/ventral axis specification	0	0	2	0.00397614
Biological_process	spectrosome organization	2	0.00346021	0	0
Biological_process	superoxide metabolic process	0	0	2	0.00397614
Biological_process	somatic stem cell division	0	0	4	0.00795229
Biological_process	reproductive process	69	0.119377	0	0
Biological_process	neuron development	3	0.00519031	0	0
Molecular_function	myosin binding	5	0.00865052	0	0
Biological_process	circadian behavior	0	0	0	0
Molecular_function	mRNA 3'-UTR AU-rich region binding	0	0	1	0.00198807
Biological_process	male courtship behavior, orientation prior to leg tapping and wing vibration	12	0.0207612	0	0
Biological_process	glycerolipid biosynthetic process	14	0.0242215	8	0.0159046
Biological_process	protein heterooligomerization	0	0	6	0.0119284
Cellular_component	transcriptionally active chromatin	0	0	4	0.00795229
Biological_process	cytosolic calcium ion homeostasis	9	0.0155709	0	0
Biological_process	BMP signaling pathway	0	0	5	0.00994036
Biological_process	transforming growth factor beta receptor signaling pathway	0	0	5	0.00994036
Biological_process	skin development	0	0	2	0.00397614
Molecular_function	tubulin binding	12	0.0207612	0	0
Biological_process	cellular amino acid metabolic process	0	0	0	0
Cellular_component	extracellular region	0	0	1	0.00198807
Biological_process	axon choice point recognition	12	0.0207612	0	0
Molecular_function	Rac guanyl-nucleotide exchange factor activity	0	0	2	0.00397614
Biological_process	porphyrin-containing compound biosynthetic process	0	0	3	0.00596422
Biological_process	organelle fission	18	0.0311419	10	0.0198807
Biological_process	heme metabolic process	0	0	3	0.00596422
Biological_process	male courtship behavior	12	0.0207612	0	0
Biological_process	anion transport	2	0.00346021	0	0
Cellular_component	intracellular non-membrane-bounded organelle	21	0.0363322	0	0
Biological_process	positive regulation of gene expression, epigenetic	0	0	4	0.00795229
Biological_process	generation of precursor metabolites and energy	0	0	10	0.0198807
Cellular_component	extracellular matrix	0	0	0	0
Biological_process	male courtship behavior, veined wing extension	12	0.0207612	0	0
Molecular_function	protein homodimerization activity	0	0	1	0.00198807
Biological_process	cellular process involved in reproduction in multicellular organism	29	0.050173	0	0
Molecular_function	anion transmembrane transporter activity	0	0	0	0
Biological_process	protein-lipid complex remodeling	0	0	2	0.00397614
Biological_process	protein glycosylation	11	0.0190311	0	0
Cellular_component	extracellular membrane-bounded organelle	0	0	28	0.055666
Cellular_component	phosphatidylinositol 3-kinase complex	2	0.00346021	0	0
Biological_process	regulation of activin receptor signaling pathway	0	0	6	0.0119284
Biological_process	organophosphate ester transport	0	0	6	0.0119284
Biological_process	regulation of synapse organization	0	0	0	0
Biological_process	regulation of response to stimulus	0	0	18	0.0357853
Biological_process	negative regulation of protein metabolic process	21	0.0363322	0	0
Biological_process	nuclear-transcribed mRNA catabolic process	0	0	6	0.0119284
Biological_process	regulation of ion transmembrane transport	6	0.0103806	0	0
Molecular_function	ion binding	157	0.271626	0	0
Cellular_component	nucleoplasm	0	0	9	0.0178926
Biological_process	oocyte development	9	0.0155709	0	0
Biological_process	oocyte microtubule cytoskeleton polarization	0	0	2	0.00397614
Molecular_function	alcohol transmembrane transporter activity	0	0	2	0.00397614
Molecular_function	Rho guanyl-nucleotide exchange factor activity	0	0	6	0.0119284
Biological_process	regulation of hydrolase activity	23	0.0397924	18	0.0357853
Biological_process	regulation of proteasome assembly	3	0.00519031	0	0
Biological_process	signaling	1	0.0017301	0	0
Biological_process	cell communication	2	0.00346021	0	0
Biological_process	larval development	29	0.050173	0	0
Molecular_function	inositol 1,4,5-trisphosphate-sensitive calcium-release channel activity	9	0.0155709	0	0
Biological_process	ribonucleoside triphosphate catabolic process	13	0.0224913	0	0
Cellular_component	perinuclear region of cytoplasm	14	0.0242215	0	0
Biological_process	CD4-positive, alpha-beta T cell activation	0	0	2	0.00397614
Biological_process	RNA interference	1	0.0017301	0	0
Biological_process	ERBB2 signaling pathway	4	0.00692042	0	0
Biological_process	positive regulation of endocytosis	0	0	8	0.0159046
Molecular_function	protein self-association	5	0.00865052	0	0
Cellular_component	extracellular region part	0	0	30	0.0596421
Biological_process	regulation of cellular component size	0	0	0	0
Biological_process	neurotransmitter receptor metabolic process	0	0	1	0.00198807
Biological_process	regulation of muscle organ development	0	0	0	0
Biological_process	vitamin transport	9	0.0155709	0	0
Biological_process	regulation of calcium ion transport into cytosol	0	0	2	0.00397614
Molecular_function	chromatin binding	0	0	10	0.0198807
Biological_process	dorsal/ventral axis specification, ovarian follicular epithelium	3	0.00519031	4	0.00795229
Biological_process	adult locomotory behavior	9	0.0155709	0	0
Cellular_component	apicolateral plasma membrane	3	0.00519031	0	0
Biological_process	neuromuscular process	0	0	0	0
Biological_process	demethylation	3	0.00519031	0	0
Molecular_function	microtubule binding	12	0.0207612	0	0
Biological_process	regulation of cellular metabolic process	0	0	73	0.145129
Biological_process	negative regulation of metalloenzyme activity	0	0	2	0.00397614
Molecular_function	signaling receptor activity	0	0	0	0
Biological_process	mitotic sister chromatid separation	2	0.00346021	0	0
Biological_process	regulation of lipid biosynthetic process	0	0	5	0.00994036
Biological_process	monocarboxylic acid metabolic process	0	0	0	0
Biological_process	negative regulation of sequestering of calcium ion	9	0.0155709	0	0
Molecular_function	calcium ion binding	4	0.00692042	0	0
Biological_process	regulation of protein exit from endoplasmic reticulum	0	0	4	0.00795229
Biological_process	regulation of chromatin assembly or disassembly	13	0.0224913	0	0
Biological_process	ribose phosphate metabolic process	0	0	2	0.00397614
Biological_process	regulation of synapse assembly	0	0	0	0
Biological_process	macromolecule modification	49	0.0847751	0	0
Biological_process	response to transforming growth factor beta stimulus	0	0	5	0.00994036
Biological_process	negative regulation of vasoconstriction	1	0.0017301	0	0
Molecular_function	S-(hydroxymethyl)glutathione dehydrogenase activity	0	0	1	0.00198807
Biological_process	regulation of skeletal muscle tissue development	0	0	0	0
Biological_process	purine nucleoside catabolic process	13	0.0224913	0	0
Molecular_function	transcription regulatory region DNA binding	3	0.00519031	0	0
Biological_process	glomerular epithelial cell development	0	0	6	0.0119284
Biological_process	positive regulation of nitrogen compound metabolic process	12	0.0207612	0	0
Cellular_component	endoplasmic reticulum part	0	0	0	0
Biological_process	actin cytoskeleton organization	31	0.0536332	18	0.0357853
Molecular_function	4-aminobutyrate transaminase activity	0	0	1	0.00198807
Biological_process	signal complex assembly	2	0.00346021	0	0
Biological_process	extracellular matrix assembly	0	0	2	0.00397614
Biological_process	germarium-derived oocyte fate determination	0	0	2	0.00397614
Biological_process	T-helper cell differentiation	0	0	2	0.00397614
Biological_process	regulation of GTPase activity	15	0.0259516	0	0
Biological_process	response to oxidative stress	15	0.0259516	0	0
Biological_process	male gamete generation	21	0.0363322	0	0
Biological_process	regulation of nucleotide catabolic process	15	0.0259516	0	0
Biological_process	apposition of dorsal and ventral imaginal disc-derived wing surfaces	0	0	2	0.00397614
Biological_process	macromolecular complex remodeling	0	0	2	0.00397614
Biological_process	ventral cord development	0	0	6	0.0119284
Molecular_function	transferase activity, transferring phosphorus-containing groups	54	0.0934256	0	0
Molecular_function	regulatory region nucleic acid binding	3	0.00519031	0	0
Biological_process	positive regulation of oxidoreductase activity	0	0	2	0.00397614
Biological_process	establishment of RNA localization	0	0	8	0.0159046
Biological_process	Ral protein signal transduction	7	0.0121107	0	0
Biological_process	norepinephrine metabolic process	0	0	2	0.00397614
Molecular_function	enzyme binding	22	0.0380623	0	0
Biological_process	cellular response to nerve growth factor stimulus	0	0	6	0.0119284
Biological_process	nucleotide metabolic process	0	0	4	0.00795229
Biological_process	positive regulation of actin filament bundle assembly	0	0	3	0.00596422
Biological_process	regulation of systemic arterial blood pressure mediated by a chemical signal	3	0.00519031	0	0
Biological_process	negative regulation of developmental process	4	0.00692042	2	0.00397614
Biological_process	extracellular matrix organization	17	0.0294118	0	0
Biological_process	programmed cell death	0	0	2	0.00397614
Biological_process	removal of superoxide radicals	0	0	2	0.00397614
Molecular_function	receptor signaling protein serine/threonine kinase activity	0	0	4	0.00795229
Biological_process	positive regulation of phosphatase activity	0	0	6	0.0119284
Biological_process	tetrapyrrole biosynthetic process	0	0	3	0.00596422
Molecular_function	calcium channel activity	9	0.0155709	0	0
Biological_process	actin polymerization or depolymerization	4	0.00692042	3	0.00596422
Biological_process	mesoderm development	9	0.0155709	0	0
Biological_process	response to oxygen levels	0	0	0	0
Molecular_function	transporter activity	16	0.0276817	0	0
Biological_process	behavior	0	0	10	0.0198807
Biological_process	dATP metabolic process	0	0	2	0.00397614
Molecular_function	hydrolase activity, acting on acid anhydrides, in phosphorus-containing anhydrides	27	0.0467128	0	0
Biological_process	cell-cell junction maintenance	3	0.00519031	0	0
Biological_process	organic acid biosynthetic process	0	0	0	0
Biological_process	organic cyclic compound biosynthetic process	32	0.0553633	0	0
Molecular_function	protein kinase inhibitor activity	2	0.00346021	0	0
Cellular_component	cell junction	10	0.017301	9	0.0178926
Cellular_component	flotillin complex	2	0.00346021	0	0
Molecular_function	lysine N-methyltransferase activity	3	0.00519031	5	0.00994036
Biological_process	nuclear-transcribed mRNA catabolic process, exonucleolytic, 3'-5'	2	0.00346021	0	0
Biological_process	lipid homeostasis	9	0.0155709	0	0
Biological_process	locomotion	41	0.0709343	0	0
Biological_process	chromatin organization	19	0.032872	0	0
Biological_process	regulation of chromosome organization	14	0.0242215	0	0
Biological_process	hexose catabolic process	0	0	9	0.0178926
Molecular_function	lipid binding	0	0	0	0
Biological_process	negative regulation of cellular component movement	0	0	6	0.0119284
Biological_process	protein localization	21	0.0363322	14	0.027833
Biological_process	response to organic substance	6	0.0103806	0	0
Biological_process	positive regulation of protein oligomerization	3	0.00519031	0	0
Biological_process	syncytium formation	0	0	10	0.0198807
Biological_process	cell projection organization	0	0	10	0.0198807
Biological_process	regulation of catalytic activity	32	0.0553633	0	0
Biological_process	positive regulation of growth hormone secretion	0	0	2	0.00397614
Molecular_function	transmembrane transporter activity	16	0.0276817	0	0
Cellular_component	intracellular part	0	0	177	0.351889
Biological_process	intracellular transport	0	0	22	0.0437376
Biological_process	negative regulation of proteasomal protein catabolic process	16	0.0276817	0	0
Biological_process	protein lipoylation	0	0	1	0.00198807
Molecular_function	protein binding transcription factor activity	2	0.00346021	0	0
Molecular_function	carbohydrate binding	10	0.017301	0	0
Biological_process	RNA transport	0	0	8	0.0159046
Biological_process	cartilage development	0	0	2	0.00397614
Biological_process	multi-organism behavior	0	0	1	0.00198807
Biological_process	ensheathment of neurons	0	0	4	0.00795229
Cellular_component	intermediate filament cytoskeleton	2	0.00346021	0	0
Molecular_function	inositol-1,4,5-trisphosphate 3-kinase activity	2	0.00346021	0	0
Biological_process	regulation of JUN kinase activity	4	0.00692042	0	0
Biological_process	covalent chromatin modification	0	0	9	0.0178926
Molecular_function	kinase activity	52	0.0899654	0	0
Molecular_function	lipid kinase activity	2	0.00346021	0	0
Biological_process	gene silencing by RNA	4	0.00692042	0	0
Molecular_function	gated channel activity	0	0	0	0
Biological_process	pore complex assembly	2	0.00346021	2	0.00397614
Biological_process	regulation of protein complex assembly	15	0.0259516	0	0
Biological_process	phospholipid transport	0	0	6	0.0119284
Biological_process	alpha-beta T cell activation involved in immune response	0	0	2	0.00397614
Biological_process	system development	31	0.0536332	2	0.00397614
Biological_process	protein localization to chromatin	2	0.00346021	0	0
Biological_process	cellular protein modification process	49	0.0847751	0	0
Molecular_function	S-adenosylmethionine-dependent methyltransferase activity	0	0	5	0.00994036
Molecular_function	translation initiation factor activity	0	0	4	0.00795229
Molecular_function	histone binding	0	0	3	0.00596422
Biological_process	regulation of transferase activity	0	0	0	0
Biological_process	regulation of phosphorylation	18	0.0311419	2	0.00397614
Biological_process	short-term memory	12	0.0207612	0	0
Biological_process	macromolecule methylation	0	0	5	0.00994036
Biological_process	intracellular sterol transport	0	0	2	0.00397614
Molecular_function	cytoskeletal adaptor activity	2	0.00346021	0	0
Biological_process	oocyte maturation	0	0	1	0.00198807
Biological_process	organic anion transport	0	0	0	0
Biological_process	response to fluid shear stress	0	0	3	0.00596422
Biological_process	positive regulation of macromolecule biosynthetic process	11	0.0190311	0	0
Biological_process	venous blood vessel development	1	0.0017301	0	0
Molecular_function	histone methyltransferase activity (H3-K4 specific)	0	0	5	0.00994036
Biological_process	release of cytochrome c from mitochondria	0	0	2	0.00397614
Biological_process	oviposition	0	0	4	0.00795229
Molecular_function	ubiquitin thiolesterase activity	0	0	5	0.00994036
Biological_process	regulation of cell development	9	0.0155709	0	0
Molecular_function	inositol hexakisphosphate kinase activity	2	0.00346021	0	0
Biological_process	protein dealkylation	3	0.00519031	0	0
Biological_process	stabilization of membrane potential	9	0.0155709	0	0
Molecular_function	phosphotransferase activity, alcohol group as acceptor	52	0.0899654	0	0
Biological_process	positive regulation of Rho protein signal transduction	0	0	1	0.00198807
Biological_process	negative regulation of actin filament depolymerization	5	0.00865052	0	0
Biological_process	mitotic cytokinesis	12	0.0207612	0	0
Molecular_function	sequence-specific DNA binding	8	0.0138408	3	0.00596422
Biological_process	intracellular cholesterol transport	0	0	2	0.00397614
Molecular_function	receptor serine/threonine kinase binding	0	0	6	0.0119284
Biological_process	regulation of growth hormone secretion	0	0	2	0.00397614
Biological_process	RNA phosphodiester bond hydrolysis, endonucleolytic	2	0.00346021	0	0
Cellular_component	exon-exon junction complex	0	0	4	0.00795229
Biological_process	central nervous system neuron development	0	0	2	0.00397614
Molecular_function	purine ribonucleotide binding	80	0.138408	0	0
Biological_process	phenol-containing compound metabolic process	0	0	6	0.0119284
Biological_process	regulation of cell differentiation	11	0.0190311	0	0
Biological_process	monoubiquitinated histone deubiquitination	0	0	2	0.00397614
Biological_process	liquid clearance, open tracheal system	3	0.00519031	0	0
Biological_process	positive regulation of rubidium ion transport	5	0.00865052	0	0
Biological_process	ribosomal protein import into nucleus	0	0	2	0.00397614
Biological_process	negative regulation of endopeptidase activity	7	0.0121107	0	0
Biological_process	leukocyte activation involved in immune response	0	0	3	0.00596422
Biological_process	in utero embryonic development	8	0.0138408	11	0.0218688
Biological_process	microvillar actin bundle assembly	0	0	1	0.00198807
Molecular_function	transferase activity, transferring one-carbon groups	0	0	8	0.0159046
Molecular_function	dioxygenase activity	3	0.00519031	0	0
Biological_process	positive regulation of developmental process	0	0	0	0
Biological_process	cell differentiation involved in embryonic placenta development	5	0.00865052	0	0
Molecular_function	DEAD/H-box RNA helicase binding	9	0.0155709	0	0
Biological_process	negative regulation of peptidase activity	7	0.0121107	0	0
Molecular_function	small GTPase regulator activity	28	0.0484429	11	0.0218688
Biological_process	hematopoietic progenitor cell differentiation	0	0	14	0.027833
Biological_process	second-messenger-mediated signaling	9	0.0155709	0	0
Molecular_function	dynein intermediate chain binding	5	0.00865052	0	0
Biological_process	histone H3-K36 demethylation	3	0.00519031	0	0
Biological_process	signal transduction	69	0.119377	0	0
Molecular_function	transcription regulatory region sequence-specific DNA binding	1	0.0017301	0	0
Biological_process	open tracheal system development	16	0.0276817	0	0
Biological_process	histone H3-K27 methylation	2	0.00346021	0	0
Biological_process	renal system process	0	0	6	0.0119284
Biological_process	respiratory system development	16	0.0276817	0	0
Biological_process	negative regulation of macromolecule metabolic process	37	0.0640138	0	0
Cellular_component	contractile fiber part	0	0	0	0
Cellular_component	neuron part	0	0	27	0.0536779
Biological_process	regulation of protein metabolic process	36	0.0622837	0	0
Biological_process	positive regulation of phosphorus metabolic process	16	0.0276817	0	0
Biological_process	response to radiation	0	0	0	0
Biological_process	purine deoxyribonucleotide metabolic process	0	0	2	0.00397614
Biological_process	positive regulation of intracellular transport	0	0	6	0.0119284
Biological_process	death	0	0	4	0.00795229
Biological_process	cell fate commitment	3	0.00519031	0	0
Biological_process	protein modification by small protein conjugation or removal	2	0.00346021	13	0.0258449
Biological_process	mating behavior, sex discrimination	12	0.0207612	0	0
Biological_process	tissue remodeling	0	0	2	0.00397614
Biological_process	vacuolar transport	5	0.00865052	0	0
Biological_process	molting cycle process	0	0	2	0.00397614
Biological_process	endocrine process	3	0.00519031	0	0
Biological_process	positive regulation of protein complex assembly	5	0.00865052	0	0
Biological_process	histone mRNA catabolic process	0	0	3	0.00596422
Biological_process	phosphatidylinositol metabolic process	12	0.0207612	0	0
Molecular_function	N-acetyltransferase activity	0	0	3	0.00596422
Biological_process	regulation of phosphorus metabolic process	32	0.0553633	0	0
Cellular_component	mitochondrial outer membrane	0	0	4	0.00795229
Biological_process	larval feeding behavior	21	0.0363322	0	0
Biological_process	regulation of triglyceride metabolic process	0	0	3	0.00596422
Biological_process	response to stress	58	0.100346	0	0
Biological_process	negative regulation of cell cycle	0	0	6	0.0119284
Biological_process	positive regulation of RNA metabolic process	11	0.0190311	0	0
Biological_process	regulation of dephosphorylation	0	0	7	0.0139165
Biological_process	regulation of membrane potential	0	0	0	0
Biological_process	photoreceptor cell development	0	0	0	0
Biological_process	neuron recognition	0	0	0	0
Molecular_function	calcium-release channel activity	9	0.0155709	0	0
Molecular_function	lysophospholipid acyltransferase activity	3	0.00519031	0	0
Biological_process	regulation of protein kinase B signaling cascade	0	0	6	0.0119284
Biological_process	establishment of apical/basal cell polarity	3	0.00519031	0	0
Biological_process	regulation of lung blood pressure	1	0.0017301	0	0
Molecular_function	cofactor binding	1	0.0017301	10	0.0198807
Biological_process	positive regulation of cell differentiation	0	0	0	0
Biological_process	biological adhesion	12	0.0207612	26	0.0516899
Biological_process	rhythmic process	0	0	0	0
Molecular_function	binding, bridging	6	0.0103806	0	0
Biological_process	ion transmembrane transport	1	0.0017301	2	0.00397614
Biological_process	negative regulation of catabolic process	16	0.0276817	0	0
Biological_process	mRNA metabolic process	0	0	15	0.0298211
Molecular_function	ammonia ligase activity	0	0	1	0.00198807
Cellular_component	spindle pole	0	0	3	0.00596422
Biological_process	chaeta morphogenesis	0	0	4	0.00795229
Biological_process	nuclear-transcribed mRNA catabolic process, nonsense-mediated decay	0	0	6	0.0119284
Molecular_function	sterol-transporting ATPase activity	0	0	2	0.00397614
Molecular_function	receptor signaling complex scaffold activity	0	0	6	0.0119284
Cellular_component	nuclear pore outer ring	2	0.00346021	2	0.00397614
Biological_process	fluid transport	3	0.00519031	0	0
Biological_process	regulation of epidermal cell differentiation	2	0.00346021	0	0
Biological_process	regulation of mitochondrial depolarization	0	0	2	0.00397614
Biological_process	phosphatidylserine metabolic process	0	0	3	0.00596422
Biological_process	regulation of cellular biosynthetic process	34	0.0588235	55	0.109344
Biological_process	maintenance of cell polarity	3	0.00519031	0	0
Molecular_function	oxidoreductase activity, acting on paired donors, with incorporation or reduction of molecular oxygen, 2-oxoglutarate as one donor, and incorporation of one atom each of oxygen into both donors	3	0.00519031	0	0
Biological_process	neuroblast division	3	0.00519031	4	0.00795229
Biological_process	RNA catabolic process	0	0	6	0.0119284
Biological_process	cerebellar cortex development	2	0.00346021	0	0
Biological_process	negative regulation of lipid storage	0	0	2	0.00397614
Biological_process	leukocyte tethering or rolling	0	0	1	0.00198807
Biological_process	response to hexose stimulus	0	0	3	0.00596422
Biological_process	ncRNA catabolic process	2	0.00346021	0	0
Cellular_component	brush border membrane	0	0	2	0.00397614
Biological_process	regulation of biological process	173	0.299308	0	0
Biological_process	intracellular signal transduction	43	0.0743945	4	0.00795229
Molecular_function	demethylase activity	3	0.00519031	0	0
Biological_process	regulation of peptidyl-threonine phosphorylation	5	0.00865052	0	0
Biological_process	humoral immune response	0	0	0	0
Biological_process	regulation of RNA biosynthetic process	31	0.0536332	0	0
Biological_process	positive regulation of ubiquitin-specific protease activity	0	0	2	0.00397614
Biological_process	protein maturation by protein folding	0	0	1	0.00198807
Biological_process	regulation of establishment of protein localization	12	0.0207612	0	0
Biological_process	cell-cell adhesion	0	0	2	0.00397614
Biological_process	cell junction organization	18	0.0311419	0	0
Biological_process	glycoprotein biosynthetic process	0	0	2	0.00397614
Biological_process	synaptic vesicle transport	12	0.0207612	0	0
Biological_process	phosphatidic acid metabolic process	4	0.00692042	0	0
Biological_process	regulation of imaginal disc growth	3	0.00519031	0	0
Biological_process	regulation of mitochondrial outer membrane permeabilization	3	0.00519031	0	0
Biological_process	guanosine-containing compound catabolic process	12	0.0207612	0	0
Biological_process	establishment of monopolar cell polarity	3	0.00519031	0	0
Molecular_function	C2H2 zinc finger domain binding	5	0.00865052	0	0
Molecular_function	potassium ion transmembrane transporter activity	0	0	0	0
Biological_process	lipid translocation	0	0	4	0.00795229
Biological_process	mRNA export from nucleus	0	0	3	0.00596422
Molecular_function	mitogen-activated protein kinase kinase binding	4	0.00692042	0	0
Molecular_function	anion binding	86	0.148789	0	0
Molecular_function	histone methyltransferase activity (H4-K20 specific)	0	0	4	0.00795229
Biological_process	indolalkylamine metabolic process	0	0	2	0.00397614
Biological_process	associative learning	12	0.0207612	0	0
Molecular_function	guanyl nucleotide binding	12	0.0207612	0	0
Molecular_function	cell adhesion molecule binding	0	0	6	0.0119284
Biological_process	cytoplasmic transport, nurse cell to oocyte	0	0	4	0.00795229
Biological_process	epithelial cell development	0	0	11	0.0218688
Molecular_function	ribonucleotide binding	81	0.140138	0	0
Molecular_function	nucleoside binding	80	0.138408	0	0
Biological_process	regulation of protein kinase activity	0	0	0	0
Biological_process	response to nutrient	12	0.0207612	0	0
Biological_process	receptor clustering	0	0	6	0.0119284
Molecular_function	organic cyclic compound binding	144	0.249135	0	0
Biological_process	cell-matrix adhesion	0	0	13	0.0258449
Biological_process	glomerular visceral epithelial cell development	0	0	6	0.0119284
Biological_process	regulation of imaginal disc-derived wing size	13	0.0224913	0	0
Biological_process	rhythmic behavior	0	0	0	0
Molecular_function	lysophosphatidic acid acyltransferase activity	3	0.00519031	0	0
Molecular_function	cysteine-type endopeptidase inhibitor activity	7	0.0121107	0	0
Biological_process	negative regulation of intracellular protein kinase cascade	0	0	6	0.0119284
Biological_process	positive regulation of biosynthetic process of antibacterial peptides active against Gram-negative bacteria	0	0	2	0.00397614
Biological_process	glomerulus morphogenesis	0	0	3	0.00596422
Biological_process	negative regulation of organelle organization	0	0	0	0
Biological_process	purine ribonucleoside triphosphate catabolic process	13	0.0224913	0	0
Cellular_component	photoreceptor disc membrane	5	0.00865052	0	0
Biological_process	regulation of establishment of protein localization to plasma membrane	5	0.00865052	0	0
Biological_process	multicellular organismal reproductive behavior	12	0.0207612	0	0
Molecular_function	secondary active transmembrane transporter activity	0	0	0	0
Biological_process	alpha-beta T cell activation	0	0	2	0.00397614
Biological_process	protein demethylation	3	0.00519031	0	0
Molecular_function	histone demethylase activity	3	0.00519031	0	0
Biological_process	histone methylation	0	0	5	0.00994036
Molecular_function	voltage-gated cation channel activity	0	0	0	0
Molecular_function	transferase activity, transferring acyl groups	0	0	7	0.0139165
Molecular_function	receptor binding	0	0	12	0.0238569
Biological_process	regulation of cholesterol efflux	0	0	2	0.00397614
Biological_process	phospholipid translocation	0	0	4	0.00795229
Biological_process	copper ion transmembrane transport	0	0	2	0.00397614
Biological_process	sex differentiation	12	0.0207612	0	0
Molecular_function	sequence-specific DNA binding transcription factor activity	0	0	7	0.0139165
Biological_process	oocyte axis specification	0	0	6	0.0119284
Biological_process	positive regulation of multicellular organismal process	1	0.0017301	0	0
Biological_process	drug transmembrane transport	0	0	4	0.00795229
Cellular_component	ruffle	0	0	3	0.00596422
Biological_process	positive regulation of intracellular protein transport	0	0	4	0.00795229
Molecular_function	transmembrane signaling receptor activity	0	0	0	0
Molecular_function	cadherin binding	0	0	6	0.0119284
Biological_process	axon ensheathment in central nervous system	3	0.00519031	4	0.00795229
Biological_process	regulation of skeletal muscle fiber development	0	0	0	0
Biological_process	forebrain development	4	0.00692042	0	0
Molecular_function	inositol hexakisphosphate 5-kinase activity	2	0.00346021	0	0
Biological_process	positive regulation of steroid metabolic process	0	0	2	0.00397614
Biological_process	satellite cell maintenance involved in skeletal muscle regeneration	2	0.00346021	0	0
Biological_process	mating	12	0.0207612	0	0
Molecular_function	purine ribonucleoside binding	80	0.138408	0	0
Biological_process	positive regulation of cell communication	0	0	3	0.00596422
Biological_process	glial cell differentiation	3	0.00519031	4	0.00795229
Molecular_function	peptidase activity, acting on L-amino acid peptides	4	0.00692042	0	0
Cellular_component	mitochondrion	2	0.00346021	0	0
Biological_process	learning	13	0.0224913	0	0
Biological_process	cortical actin cytoskeleton organization	15	0.0259516	4	0.00795229
Biological_process	female gamete generation	0	0	13	0.0258449
Biological_process	synaptic vesicle membrane organization	12	0.0207612	0	0
Biological_process	oocyte fate determination	0	0	2	0.00397614
Biological_process	defense response to fungus	0	0	4	0.00795229
Biological_process	establishment of localization in cell	36	0.0622837	0	0
Biological_process	positive regulation of hydrolase activity	0	0	14	0.027833
Biological_process	cation homeostasis	10	0.017301	17	0.0337972
Biological_process	protein O-linked glycosylation	4	0.00692042	0	0
Biological_process	positive regulation of protein modification process	0	0	1	0.00198807
Biological_process	vulval development	9	0.0155709	0	0
Biological_process	nervous system development	0	0	0	0
Biological_process	response to light stimulus	0	0	0	0
Biological_process	copper ion transport	0	0	2	0.00397614
Biological_process	glucose catabolic process	0	0	9	0.0178926
Molecular_function	G-protein coupled receptor activity	0	0	0	0
Biological_process	positive regulation of protein complex disassembly	0	0	2	0.00397614
Biological_process	purine ribonucleoside triphosphate metabolic process	14	0.0242215	0	0
Molecular_function	GDP-dissociation inhibitor activity	3	0.00519031	4	0.00795229
Molecular_function	myosin-light-chain-phosphatase activity	2	0.00346021	0	0
Biological_process	cortical cytoskeleton organization	15	0.0259516	4	0.00795229
Biological_process	regionalization	2	0.00346021	0	0
Biological_process	cellular response to stress	25	0.0432526	0	0
Molecular_function	heterocyclic compound binding	144	0.249135	0	0
Biological_process	immune effector process	7	0.0121107	5	0.00994036
Biological_process	embryo development ending in birth or egg hatching	0	0	15	0.0298211
Biological_process	cytosolic calcium ion transport	9	0.0155709	0	0
Biological_process	T cell activation involved in immune response	0	0	2	0.00397614
Biological_process	negative regulation of cell death	2	0.00346021	0	0
Biological_process	muscle structure development	14	0.0242215	0	0
Biological_process	primary miRNA processing	0	0	2	0.00397614
Biological_process	regulation of protein localization	19	0.032872	0	0
Biological_process	carboxylic acid biosynthetic process	0	0	0	0
Molecular_function	SH3 domain binding	2	0.00346021	0	0
Molecular_function	GTPase activity	12	0.0207612	0	0
Biological_process	syncytium formation by plasma membrane fusion	0	0	10	0.0198807
Molecular_function	inorganic cation transmembrane transporter activity	0	0	2	0.00397614
Cellular_component	organelle inner membrane	0	0	7	0.0139165
Biological_process	positive regulation of Ral GTPase activity	7	0.0121107	0	0
Biological_process	hair follicle morphogenesis	0	0	2	0.00397614
Biological_process	sensory perception	0	0	0	0
Molecular_function	dynactin binding	5	0.00865052	0	0
Biological_process	cell-substrate adhesion	0	0	13	0.0258449
Biological_process	proboscis extension reflex	12	0.0207612	0	0
Biological_process	termination of G-protein coupled receptor signaling pathway	3	0.00519031	4	0.00795229
Biological_process	glycosyl compound catabolic process	13	0.0224913	0	0
Biological_process	regulation of protein complex disassembly	0	0	5	0.00994036
Biological_process	regulation of peptidase activity	7	0.0121107	0	0
Biological_process	phosphorylation	28	0.0484429	4	0.00795229
Biological_process	lysosomal transport	5	0.00865052	0	0
Biological_process	negative regulation of voltage-gated calcium channel activity	1	0.0017301	0	0
Biological_process	protein polymerization	4	0.00692042	3	0.00596422
Biological_process	regulation of cellular protein metabolic process	36	0.0622837	0	0
Biological_process	peptidyl-serine modification	13	0.0224913	0	0
Biological_process	elevation of cytosolic calcium ion concentration	9	0.0155709	0	0
Cellular_component	site of polarized growth	0	0	5	0.00994036
Biological_process	regulation of ion homeostasis	12	0.0207612	0	0
Biological_process	response to superoxide	0	0	2	0.00397614
Biological_process	positive regulation of signaling	0	0	3	0.00596422
Molecular_function	MAP-kinase scaffold activity	4	0.00692042	0	0
Molecular_function	RNA helicase activity	0	0	4	0.00795229
Cellular_component	neuron projection membrane	4	0.00692042	0	0
Cellular_component	integral to membrane	0	0	42	0.083499
Biological_process	mushroom body development	9	0.0155709	0	0
Biological_process	regulation of defense response to bacterium	0	0	2	0.00397614
Biological_process	regulation of systemic arterial blood pressure by atrial natriuretic peptide	3	0.00519031	0	0
Molecular_function	small molecule binding	85	0.147059	0	0
Biological_process	regulation of steroid biosynthetic process	0	0	2	0.00397614
Cellular_component	microtubule	17	0.0294118	2	0.00397614
Molecular_function	endopeptidase regulator activity	7	0.0121107	0	0
Biological_process	elastin metabolic process	0	0	2	0.00397614
Molecular_function	coenzyme binding	0	0	9	0.0178926
Biological_process	compound eye photoreceptor fate commitment	0	0	0	0
Cellular_component	mitochondrial inner membrane	0	0	7	0.0139165
Biological_process	positive regulation of neuron projection development	0	0	10	0.0198807
Molecular_function	ATP-dependent RNA helicase activity	0	0	4	0.00795229
Biological_process	dorsal closure, amnioserosa morphology change	3	0.00519031	0	0
Biological_process	polyuridylation-dependent mRNA catabolic process	2	0.00346021	0	0
Cellular_component	subapical complex	3	0.00519031	0	0
Biological_process	low-density lipoprotein particle remodeling	0	0	2	0.00397614
Biological_process	ribonucleotide metabolic process	0	0	2	0.00397614
Molecular_function	transferase activity, transferring hexosyl groups	8	0.0138408	0	0
Biological_process	positive regulation of cholesterol metabolic process	0	0	2	0.00397614
Biological_process	gamma-aminobutyric acid catabolic process	0	0	1	0.00198807
Biological_process	protein methylation	0	0	5	0.00994036
Biological_process	oocyte dorsal/ventral axis specification	4	0.00692042	6	0.0119284
Biological_process	regulation of phosphoprotein phosphatase activity	0	0	6	0.0119284
Biological_process	single-organism developmental process	101	0.17474	0	0
Molecular_function	O-acyltransferase activity	0	0	3	0.00596422
Biological_process	regulation of receptor-mediated endocytosis	0	0	8	0.0159046
Biological_process	regulation of cholesterol metabolic process	0	0	2	0.00397614
Biological_process	response to stimulus	129	0.223183	0	0
Biological_process	cellular response to fluid shear stress	0	0	3	0.00596422
Molecular_function	phosphatidylinositol phosphate 4-phosphatase activity	8	0.0138408	0	0
Biological_process	chemical homeostasis	0	0	19	0.0377734
Biological_process	cellular protein localization	0	0	10	0.0198807
Biological_process	muscle system process	0	0	0	0
Biological_process	axonogenesis	1	0.0017301	0	0
Biological_process	negative regulation of transcription elongation from RNA polymerase II promoter	2	0.00346021	0	0
Biological_process	apoptotic mitochondrial changes	0	0	2	0.00397614
Biological_process	stem cell division	0	0	4	0.00795229
Biological_process	rhabdomere morphogenesis	3	0.00519031	0	0
Biological_process	monoubiquitinated protein deubiquitination	0	0	2	0.00397614
Biological_process	protein localization to nucleus	5	0.00865052	0	0
Cellular_component	ESC/E(Z) complex	2	0.00346021	0	0
Biological_process	appendage morphogenesis	0	0	10	0.0198807
Biological_process	positive regulation of cellular biosynthetic process	11	0.0190311	0	0
Biological_process	regulation of receptor internalization	0	0	6	0.0119284
Biological_process	DNA repair	0	0	7	0.0139165
Biological_process	positive regulation of sodium ion transmembrane transporter activity	5	0.00865052	0	0
Biological_process	glycolysis	0	0	9	0.0178926
Biological_process	glomerular filtration	0	0	6	0.0119284
Biological_process	response to fungus	0	0	4	0.00795229
Biological_process	endoplasmic reticulum unfolded protein response	2	0.00346021	0	0
Biological_process	ribonucleoside catabolic process	13	0.0224913	0	0
Biological_process	axis specification	0	0	8	0.0159046
Biological_process	histone deubiquitination	0	0	2	0.00397614
Biological_process	establishment of glial blood-brain barrier	0	0	4	0.00795229
