# Supplementary material for: Genome-Wide Differential DNA Methylation in Reproductive, Morphological, and Visual System Differences Between Queen Bee and Worker Bee (Apis mellifera)
Source: Front Genet. 2020 Aug 7;11:770. doi: 10.3389/fgene.2020.00770 (PMC7438783; doi:10.3389/fgene.2020.00770)
Supplement: TABLE S5 — GO annotation profile for differentially methylated genes (DMGs) between queen larvae and worker larvae at the age of 4 days. [file Table_5.XLS]

## Sheet: GO
Gene name	Chromosome	ID	GO				KEGG
			GO	GO function annotation	P value	Result	map	name	P value	Result
ABCA3	NC_007078.3	XM_006561817.1	——	——	——	——	——	——	——	——
PI4K2β	NC_007084.3	XM_006563537.1	——	——	——	——	——	——	——	——
PI4α	NC_007077.3	XM_006557267.1	——	——	——	——	——	——	——	——
SAMCP	NC_007084.3	XM_006558277.1	GO:0055085	transmembrane transport	3.11e-15	Yes	——	——	——	——
			GO:0044763	single-organism cellular process	1.5e-08	Yes	——	——	——	——
			GO:0009987	cellular process	1.13e-05	Yes	——	——	——	——
WNK3	NC_007084.3	XM_006559962.1;XM_006559960.1;XM_006559959.1;XM_006559964.1;XM_006559963.1;XM_006559961.1_cds	GO:0060255	regulation of macromolecule metabolic process	1.28e-06	Yes	——	——	——	——
			GO:0048518	positive regulation of biological process	1.73e-06	Yes	——	——	——	——
			GO:0043412	macromolecule modification	7.71e-06	Yes	——	——	——	——
			GO:0044267	cellular protein metabolic process	7.84e-06	Yes	——	——	——	——
			GO:0048522	positive regulation of cellular process	1.16e-05	Yes	——	——	——	——
			GO:0019538	protein metabolic process	1.49e-05	Yes	——	——	——	——
			GO:0036211	protein modification process	1.59e-05	Yes	——	——	——	——
			GO:0006464	cellular protein modification process	1.59e-05	Yes	——	——	——	——
			GO:0016310	phosphorylation	3.33e-05	Yes	——	——	——	——
			GO:0006468	protein phosphorylation	0.000114203	Yes	——	——	——	——
			GO:0032879	regulation of localization	0.000374373	Yes	——	——	——	——
			GO:0042325	regulation of phosphorylation	0.00134721	Yes	——	——	——	——
Fibrillin-2	NC_007072.3	XM_006560967.1_cds	——	——	——	——	——	——	——	——
HDAR3	NC_007078.3	XM_394976.5_up	——	——	——	——	——	——	——	——
PPP1Cβ	NC_007078.3	XM_623270.4;XM_006561641.1;XM_393296.5_cds	GO:0044238	primary metabolic process	8.72e-11	Yes	map04113	Meiosis - yeast	5.03758e-05	yes
			GO:0044763	single-organism cellular process	1.56e-10	Yes	map03015	mRNA surveillance pathway	1.44069e-05	yes
			GO:0044260	cellular macromolecule metabolic process	3.08e-10	Yes	map04114	Oocyte meiosis	4.19e-05	yes
			GO:0043170	macromolecule metabolic process	5.01e-10	Yes	map04270	Vascular smooth muscle contraction	0.00085858	yes
			GO:0008152	metabolic process	7.83e-09	Yes	map04810	Regulation of actin cytoskeleton	0.0015228	yes
			GO:0044237	cellular metabolic process	1.01e-07	Yes	map04720	Long-term potentiation	0.0017408	yes
			GO:0071704	organic substance metabolic process	2.56e-07	Yes	——	——	——	——
			GO:0044699	single-organism process	2.48e-06	Yes	——	——	——	——
			GO:0009987	cellular process	1.13e-05	Yes	——	——	——	——
			GO:0065007	biological regulation	0.000110901	Yes	——	——	——	——
			GO:0043234	protein complex	4.51e-11	Yes	——	——	——	——
			GO:0043231	intracellular membrane-bounded organelle	1.74e-07	Yes	——	——	——	——
			GO:0043227	membrane-bounded organelle	1.32e-06	Yes	——	——	——	——
			GO:0044424	intracellular part	4.49e-06	Yes	——	——	——	——
			GO:0005737	cytoplasm	0.00143771	Yes	——	——	——	——
			GO:0003824	catalytic activity	0.000157124	Yes	——	——	——	——
			GO:0050115	myosin-light-chain-phosphatase activity	0.000420938	Yes	——	——	——	——
DNAJB6	NC_007077.3	XM_006564535.1;XM_006564538.1;XM_006564536.1;XM_006564539.1;XM_006564537.1;XM_006564540.1_introns	GO:0044238	primary metabolic process	8.72e-11	Yes	——	——	——	——
			GO:0044763	single-organism cellular process	1.56e-10	Yes	——	——	——	——
			GO:0044260	cellular macromolecule metabolic process	3.08e-10	Yes	——	——	——	——
			GO:0043170	macromolecule metabolic process	5.01e-10	Yes	——	——	——	——
			GO:0008152	metabolic process	7.83e-09	Yes	——	——	——	——
			GO:0044237	cellular metabolic process	1.01e-07	Yes	——	——	——	——
			GO:0071704	organic substance metabolic process	2.56e-07	Yes	——	——	——	——
			GO:0044699	single-organism process	2.48e-06	Yes	——	——	——	——
			GO:0009987	cellular process	1.13e-05	Yes	——	——	——	——
			GO:0065007	biological regulation	0.000110901	Yes	——	——	——	——
			GO:0043234	protein complex	4.51e-11	Yes	——	——	——	——
			GO:0043231	intracellular membrane-bounded organelle	1.74e-07	Yes	——	——	——	——
			GO:0043227	membrane-bounded organelle	1.32e-06	Yes	——	——	——	——
			GO:0044424	intracellular part	4.49e-06	Yes	——	——	——	——
			GO:0005737	cytoplasm	0.00143771	Yes	——	——	——	——
			GO:0003824	catalytic activity	0.000157124	Yes	——	——	——	——
			GO:0050115	myosin-light-chain-phosphatase activity	0.000420938	Yes	——	——	——	——
UCHFX	NC_007074.3	XM_006562085.1;XM_395447.5;XM_006562083.1;XM_006562084.1;XM_006562082.1;XM_006562086.1_cds	GO:0009057	macromolecule catabolic process	5.68932e-21	yes	——	——	——	——
			GO:1901575	organic substance catabolic process	4.06581e-17	yes	——	——	——	——
			GO:0044248	cellular catabolic process	4.06581e-17	yes	——	——	——	——
			GO:0009790	embryo development	1.18782e-14	yes	——	——	——	——
			GO:0009056	catabolic process	2.28516e-13	yes	——	——	——	——
			GO:0022402	cell cycle process	3.61856e-12	yes	——	——	——	——
			GO:1901360	organic cyclic compound metabolic process	1.6887e-11	yes	——	——	——	——
			GO:0009791	post-embryonic development	3.04331e-11	yes	——	——	——	——
			GO:0046483	heterocycle metabolic process	5.16922e-11	yes	——	——	——	——
			GO:0044260	cellular macromolecule metabolic process	1.12983e-10	yes	——	——	——	——
			GO:0006139	nucleobase-containing compound metabolic process	2.00207e-10	yes	——	——	——	——
			GO:0044237	cellular metabolic process	2.96024e-10	yes	——	——	——	——
			GO:0036211	protein modification process	1.00535e-09	yes	——	——	——	——
			GO:0006464	cellular protein modification process	1.00535e-09	yes	——	——	——	——
			GO:0044238	primary metabolic process	1.22862e-09	yes	——	——	——	——
			GO:0006807	nitrogen compound metabolic process	1.87327e-09	yes	——	——	——	——
			GO:0006725	cellular aromatic compound metabolic process	2.14127e-09	yes	——	——	——	——
			GO:0043170	macromolecule metabolic process	3.09399e-09	yes	——	——	——	——
			GO:0021698	cerebellar cortex structural organization	3.67842e-09	yes	——	——	——	——
			GO:0034641	cellular nitrogen compound metabolic process	4.72982e-09	yes	——	——	——	——
			GO:0043412	macromolecule modification	4.98191e-09	yes	——	——	——	——
			GO:0010467	gene expression	9.56757e-09	yes	——	——	——	——
			GO:0006511	ubiquitin-dependent protein catabolic process	1.43149e-08	yes	——	——	——	——
			GO:0044267	cellular protein metabolic process	2.30913e-08	yes	——	——	——	——
			GO:0019941	modification-dependent protein catabolic process	2.56534e-08	yes	——	——	——	——
			GO:0043632	modification-dependent macromolecule catabolic process	3.58954e-08	yes	——	——	——	——
			GO:0048532	anatomical structure arrangement	7.46665e-08	yes	——	——	——	——
			GO:0016070	RNA metabolic process	9.17961e-08	yes	——	——	——	——
			GO:0008152	metabolic process	1.43145e-07	yes	——	——	——	——
			GO:0090304	nucleic acid metabolic process	3.10642e-07	yes	——	——	——	——
			GO:0051603	proteolysis involved in cellular protein catabolic process	3.50634e-07	yes	——	——	——	——
			GO:0048856	anatomical structure development	3.68697e-07	yes	——	——	——	——
			GO:0019538	protein metabolic process	8.20273e-07	yes	——	——	——	——
			GO:0016477	cell migration	9.18999e-07	yes	——	——	——	——
			GO:0048870	cell motility	3.09922e-06	yes	——	——	——	——
			GO:0006996	organelle organization	2.16686e-05	yes	——	——	——	——
			GO:0070647	protein modification by small protein conjugation or removal	2.8558e-05	yes	——	——	——	——
			GO:0021766	hippocampus development	3.37388e-05	yes	——	——	——	——
			GO:0060255	regulation of macromolecule metabolic process	3.77073e-05	yes	——	——	——	——
			GO:0009792	embryo development ending in birth or egg hatching	4.76773e-05	yes	——	——	——	——
			GO:0080090	regulation of primary metabolic process	6.81924e-05	yes	——	——	——	——
			GO:0071560	cellular response to transforming growth factor beta stimulus	9.38517e-05	yes	——	——	——	——
			GO:0071559	response to transforming growth factor beta stimulus	9.38517e-05	yes	——	——	——	——
			GO:0006508	proteolysis	0.000102687	yes	——	——	——	——
			GO:0030509	BMP signaling pathway	0.000113344	yes	——	——	——	——
			GO:0009987	cellular process	0.000121779	yes	——	——	——	——
			GO:0010468	regulation of gene expression	0.000144312	yes	——	——	——	——
			GO:0031323	regulation of cellular metabolic process	0.000159869	yes	——	——	——	——
			GO:0009059	macromolecule biosynthetic process	0.000193797	yes	——	——	——	——
			GO:0043009	chordate embryonic development	0.000205862	yes	——	——	——	——
			GO:0001701	in utero embryonic development	0.000205862	yes	——	——	——	——
			GO:0034645	cellular macromolecule biosynthetic process	0.000236786	yes	——	——	——	——
			GO:1901362	organic cyclic compound biosynthetic process	0.000288538	yes	——	——	——	——
			GO:0007059	chromosome segregation	0.000309609	yes	——	——	——	——
			GO:0016579	protein deubiquitination	0.000543945	yes	——	——	——	——
			GO:0007067	mitosis	0.000542306	yes	——	——	——	——
			GO:0032774	RNA biosynthetic process	0.000764407	yes	——	——	——	——
			GO:0018130	heterocycle biosynthetic process	0.000821944	yes	——	——	——	——
			GO:0006351	transcription, DNA-dependent	0.000939203	yes	——	——	——	——
			GO:0071840	cellular component organization or biogenesis	0.000963084	yes	——	——	——	——
			GO:0070646	protein modification by small protein removal	0.00167664	yes	——	——	——	——
			GO:0044767	single-organism developmental process	0.00190231	yes	——	——	——	——
			GO:0016043	cellular component organization	0.00223019	yes	——	——	——	——
			GO:2000112	regulation of cellular macromolecule biosynthetic process	0.00227904	yes	——	——	——	——
			GO:0065007	biological regulation	0.00231909	yes	——	——	——	——
			GO:0000280	nuclear division	0.00245233	yes	——	——	——	——
			GO:0048285	organelle fission	0.00276171	yes	——	——	——	——
			GO:0019222	regulation of metabolic process	0.00280255	yes	——	——	——	——
			GO:0034654	nucleobase-containing compound biosynthetic process	0.00290447	yes	——	——	——	——
			GO:0010556	regulation of macromolecule biosynthetic process	0.00326138	yes	——	——	——	——
			GO:0006367	transcription initiation from RNA polymerase II promoter	0.0033438	yes	——	——	——	——
			GO:0006928	cellular component movement	0.00345375	yes	——	——	——	——
JIP3	NC_007075.3	XM_006565390.1;XM_006565394.1;XM_006565393.1;XM_006565391.1;XM_006565392.1_cds	GO:0009790	embryo development	1.18782e-14	yes	——	——	——	——
			GO:0009791	post-embryonic development	3.04331e-11	yes	——	——	——	——
			GO:0030900	forebrain development	2.16987e-08	yes	——	——	——	——
			GO:0006950	response to stress	1.18086e-07	yes	——	——	——	——
			GO:0007257	activation of JUN kinase activity	1.8091e-07	yes	——	——	——	——
			GO:0048856	anatomical structure development	3.68697e-07	yes	——	——	——	——
			GO:0060425	lung morphogenesis	8.89834e-07	yes	——	——	——	——
			GO:0009967	positive regulation of signal transduction	5.03902e-06	yes	——	——	——	——
			GO:0023056	positive regulation of signaling	1.74155e-05	yes	——	——	——	——
			GO:0010647	positive regulation of cell communication	2.0776e-05	yes	——	——	——	——
			GO:0043507	positive regulation of JUN kinase activity	2.10021e-05	yes	——	——	——	——
			GO:0060255	regulation of macromolecule metabolic process	3.77073e-05	yes	——	——	——	——
			GO:0009792	embryo development ending in birth or egg hatching	4.76773e-05	yes	——	——	——	——
			GO:0048584	positive regulation of response to stimulus	5.62199e-05	yes	——	——	——	——
			GO:0080090	regulation of primary metabolic process	6.81924e-05	yes	——	——	——	——
			GO:0009987	cellular process	0.000121779	yes	——	——	——	——
			GO:0010468	regulation of gene expression	0.000144312	yes	——	——	——	——
			GO:0031323	regulation of cellular metabolic process	0.000159869	yes	——	——	——	——
			GO:0048286	lung alveolus development	0.000206292	yes	——	——	——	——
			GO:0043009	chordate embryonic development	0.000205862	yes	——	——	——	——
			GO:0001701	in utero embryonic development	0.000205862	yes	——	——	——	——
			GO:0048583	regulation of response to stimulus	0.000577463	yes	——	——	——	——
			GO:0032268	regulation of cellular protein metabolic process	0.000759449	yes	——	——	——	——
			GO:0009966	regulation of signal transduction	0.00110085	yes	——	——	——	——
			GO:0048522	positive regulation of cellular process	0.00137479	yes	——	——	——	——
			GO:0044767	single-organism developmental process	0.00190231	yes	——	——	——	——
			GO:0051246	regulation of protein metabolic process	0.00215723	yes	——	——	——	——
			GO:0065007	biological regulation	0.00231909	yes	——	——	——	——
			GO:0016192	vesicle-mediated transport	0.00263005	yes	——	——	——	——
			GO:0019222	regulation of metabolic process	0.00280255	yes	——	——	——	——
			GO:0006928	cellular component movement	0.00345375	yes	——	——	——	——
			GO:0044424	intracellular part	4.80998e-10	yes	——	——	——	——
			GO:0030673	axolemma	7.1617e-07	yes	——	——	——	——
			GO:0043229	intracellular organelle	4.81878e-06	yes	——	——	——	——
			GO:0005737	cytoplasm	2.55721e-05	yes	——	——	——	——
			GO:0044459	plasma membrane part	4.07746e-05	yes	——	——	——	——
			GO:0043231	intracellular membrane-bounded organelle	7.11275e-05	yes	——	——	——	——
			GO:0043226	organelle	6.9945e-05	yes	——	——	——	——
			GO:0005790	smooth endoplasmic reticulum	9.04774e-05	yes	——	——	——	——
			GO:0005783	endoplasmic reticulum	9.39804e-05	yes	——	——	——	——
			GO:0032589	neuron projection membrane	0.00044712	yes	——	——	——	——
			GO:0044464	cell part	0.000519161	yes	——	——	——	——
			GO:0043227	membrane-bounded organelle	0.0011086	yes	——	——	——	——
			GO:0044425	membrane part	0.0012537	yes	——	——	——	——
			GO:0031410	cytoplasmic vesicle	0.00139357	yes	——	——	——	——
			GO:0031434	mitogen-activated protein kinase kinase binding	1.65e-07	yes	——	——	——	——
			GO:0005488	binding	7.82e-07	yes	——	——	——	——
			GO:0008092	cytoskeletal protein binding	4.68e-06	yes	——	——	——	——
			GO:0031435	mitogen-activated protein kinase kinase kinase binding	5.51e-06	yes	——	——	——	——
			GO:0005078	MAP-kinase scaffold activity	1.08e-05	yes	——	——	——	——
			GO:0008432	JUN kinase binding	7.19e-05	yes	——	——	——	——
			GO:0005198	structural molecule activity	0.000509878	yes	——	——	——	——
			GO:0005515	protein binding	0.00108587	yes	——	——	——	——
			GO:0019894	kinesin binding	0.00149448	yes	——	——	——	——
			GO:0035591	signaling adaptor activity	0.00230693	yes	——	——	——	——
ANPE	NC_007082.3	XM_623896.4;XM_006557831.1;XM_006557830.1_cds	GO:0044706	multi-multicellular organism process	2.25e-25	yes	——	——	——	——
			GO:0051704	multi-organism process	8.16e-13	yes	——	——	——	——
			GO:0044238	primary metabolic process	8.72e-11	yes	——	——	——	——
			GO:0043170	macromolecule metabolic process	5.01e-10	yes	——	——	——	——
			GO:0008152	metabolic process	7.83e-09	yes	——	——	——	——
			GO:0022414	reproductive process	9.02e-08	yes	——	——	——	——
			GO:0071704	organic substance metabolic process	2.56e-07	yes	——	——	——	——
			GO:0051239	regulation of multicellular organismal process	7.67e-06	yes	——	——	——	——
			GO:0019538	protein metabolic process	1.49e-05	yes	——	——	——	——
			GO:0065007	biological regulation	0.000110901	yes	——	——	——	——
			GO:0044707	single-multicellular organism process	0.00018677	yes	——	——	——	——
			GO:0032879	regulation of localization	0.000374373	yes	——	——	——	——
			GO:0003008	system process	0.000510908	yes	——	——	——	——
			GO:0035813	regulation of renal sodium excretion	0.00082216	yes	——	——	——	——
			GO:0003050	regulation of systemic arterial blood pressure by atrial natriuretic peptide	0.00082216	yes	——	——	——	——
DENND4C	NC_007073.3	XM_006560611.1_cds	——	——	——	——	——	——	——	——
NUP205	NC_007080.3	XM_395387.5_cds	——	——	——	——	——	——	——	——
CMTM4	NC_007078.3	XM_003249929.2;XM_006561612.1_introns	GO:0050896	response to stimulus	2.96434e-11	yes	——	——	——	——
			GO:0042221	response to chemical stimulus	8.31325e-07	yes	——	——	——	——
			GO:0009605	response to external stimulus	8.64618e-06	yes	——	——	——	——
			GO:0042330	taxis	0.000811325	yes	——	——	——	——
			GO:0016021	integral to membrane	0.000238316	yes	——	——	——	——
			GO:0044425	membrane part	0.0003628	yes	——	——	——	——
			GO:0031224	intrinsic to membrane	0.000472124	yes	——	——	——	——
AGA	NC_007077.3	XM_006563869.1_cds	——	——	——	——	——	——	——	——
SRRT	NC_007075.3	XM_006570386.1;XM_396542.5;XM_006570385.1_cds	GO:1901360	organic cyclic compound metabolic process	1.6887e-11	yes	——	——	——	——
			GO:0046483	heterocycle metabolic process	5.16922e-11	yes	——	——	——	——
			GO:0044260	cellular macromolecule metabolic process	1.12983e-10	yes	——	——	——	——
			GO:0006139	nucleobase-containing compound metabolic process	2.00207e-10	yes	——	——	——	——
			GO:0044237	cellular metabolic process	2.96024e-10	yes	——	——	——	——
			GO:0044238	primary metabolic process	1.22862e-09	yes	——	——	——	——
			GO:0006807	nitrogen compound metabolic process	1.87327e-09	yes	——	——	——	——
			GO:0006725	cellular aromatic compound metabolic process	2.14127e-09	yes	——	——	——	——
			GO:0043170	macromolecule metabolic process	3.09399e-09	yes	——	——	——	——
			GO:0071704	organic substance metabolic process	3.77632e-09	yes	——	——	——	——
			GO:0034641	cellular nitrogen compound metabolic process	4.72982e-09	yes	——	——	——	——
			GO:0016070	RNA metabolic process	9.17961e-08	yes	——	——	——	——
			GO:0008152	metabolic process	1.43145e-07	yes	——	——	——	——
			GO:0090304	nucleic acid metabolic process	3.10642e-07	yes	——	——	——	——
			GO:0031053	primary miRNA processing	1.18603e-05	yes	——	——	——	——
			GO:0009987	cellular process	0.000121779	yes	——	——	——	——
			GO:0044424	intracellular part	4.80998e-10	yes	——	——	——	——
			GO:0044464	cell part	0.000519161	yes	——	——	——	——
VPS13D	NC_007077.3	XM_006564692.1_cds	——	——	——	——	——	——	——	——
UCKL1	NC_007079.3	XM_391856.5_cds	——	——	——	——	——	——	——	——
HSPG	NC_007083.3	XM_006563868.1_cds	——	——	——	——	——	——	——	——
HDAR3	NC_007078.3	XM_394976.5_up	——	——	——	——	——	——	——	——
Peregrin	NC_007083.3	XM_395348.4_cds	——	——	——	——	——	——	——	——
PAGPCG11148	NC_007077.3	XM_006564673.1;XM_006564675.1;XM_006564676.1;XM_006564674.1_cds	GO:0044464	cell part	9.5892e-12	yes	——	——	——	——
			GO:0044424	intracellular part	4.97223e-10	yes	——	——	——	——
			GO:0044430	cytoskeletal part	7.87347e-06	yes	——	——	——	——
			GO:0043226	organelle	5.55245e-05	yes	——	——	——	——
			GO:0043229	intracellular organelle	0.000445565	yes	——	——	——	——
Nischarin	NC_007075.3	XM_394619.5_cds	——	——	——	——	——	——	——	——
