# Supplementary material for: Genome-Wide Differential DNA Methylation in Reproductive, Morphological, and Visual System Differences Between Queen Bee and Worker Bee (Apis mellifera)
Source: Front Genet. 2020 Aug 7;11:770. doi: 10.3389/fgene.2020.00770 (PMC7438783; doi:10.3389/fgene.2020.00770)
Supplement: TABLE S8 — GO annotation and KEGG analysis of the top 10 DMGs between queen larvae and worker larvae at the age of 3, 4 and 5 days. [file Table_8.XLS]

Chr	Start	End	Class	W4d	Q4d	Width	mean.meth.diff	num.CpGs	num.DMCs	DMR.pvalue	DMR.qvalue	Chr	ChrStart	ChrEnd	ID	Length	Description	W VS Q
NC_007070.3	23875303	23875700	CpG	0	23.12	397	-31.49965489	22	12	0.028472653	0.413554608	NC_007070.3	23871667	23876970	XM_001120969.3_cds	397	Tight junction-associated protein 1	Hypo
NC_007071.3	9523192	9523346	CpG	10.44	0	154	18.26923077	4	1	0.049548502	0.403287402	miss	miss	miss	miss	miss	miss	Hyper
NC_007072.3	1687240	1687435	CpG	0	14.2	195	-30.00541126	9	4	0.048727352	0.381974673	NC_007072.3	1686876	1687387	XM_006558395.1_introns	147	Spectrin alpha chain	Hypo
NC_007072.3	5871910	5872070	CpG	59.85	16.07	160	46.75602312	11	7	0.004330267	0.381974673	NC_007072.3	5871817	5872795	XM_392285.5;XM_003249719.2_cds	160	E3 ubiquitin-protein ligase RNF185;E3 ubiquitin-protein ligase RNF185	Hyper
NC_007074.3	13035804	13035981	CpG	20.71	0	177	23.29545455	8	2	0.03059598	0.391608998	NC_007074.3	13035781	13036139	XM_625059.4;XM_006569929.1_cds	177	miss;miss	Hyper
NC_007076.3	775046	775198	CpG	0	31.33	152	-14.16666667	5	1	0.03922368	0.320736118	NC_007076.3	773539	776636	XM_396603.5;XM_006558097.1;XM_006558098.1_cds	152	LIM domain kinase 1;LIM domain kinase 1;LIM domain kinase 1	Hypo
NC_007078.3	6333666	6333848	CpG	58.29	28.67	182	25.83899807	8	3	0.045410297	0.198032006	NC_007078.3	6331223	6335049	XM_394812.4_cds	182	WD repeat-containing protein 35	Hyper
NC_007078.3	9791972	9792208	CpG	29.23	20.74	236	16.33896903	13	4	0.044067558	0.198032006	NC_007078.3	9791788	9792822	XR_410893.1;XM_394768.5_cds	236	miss;Dopamine N-acetyltransferase	Hyper
NC_007078.3	10114997	10115313	CpG	12.67	0	316	20.13970878	11	3	0.038440861	0.198032006	NC_007078.3	10112218	10116468	XM_006567389.1_cds	316	Sortilin-related receptor	Hyper
NC_007078.3	10229205	10229607	CpG	9.85	0	402	10.70167252	16	3	0.028317451	0.198032006	NC_007078.3	10229391	10229859	XM_624900.3;XM_006567416.1_cds	216	Pyrazinamidase/nicotinamidase;Pyrazinamidase/nicotinamidase	Hyper
NC_007078.3	10691755	10691928	CpG	38.72	0	173	38.71794872	11	5	0.002024496	0.198032006	NC_007078.3	10691466	10693153	XM_003250994.2;XM_006567470.1_up	173	Putative sodium-coupled neutral amino acid transporter 10;Putative sodium-coupled neutral amino acid transporter 10	Hyper
NC_007078.3	10735703	10735908	CpG	0	8.44	205	-17.02380952	8	2	0.035552229	0.198032006	NC_007078.3	10735560	10735943	XR_410918.1;XM_006567559.1;XM_006567518.1;XR_410921.1;XM_006567488.1;XM_006567535.1;XM_006567532.1;XM_006567528.1;XM_006567541.1;XM_006567497.1;XM_006567555.1;XM_006567504.1;XM_006567530.1;XM_006567569.1;XM_006567554.1;XM_006567534.1;XM_006567492.1;XM_006567495.1;XM_006567525.1;XM_006567558.1;XM_006567536.1;XM_006567519.1;XM_006567553.1;XR_410913.1;XM_006567490.1;XM_006567544.1;XR_410914.1;XM_006…	205	miss;Longitudinals lacking protein, isoforms H/M/V;Longitudinals lacking protein, isoforms H/M/V;miss;Longitudinals lacking protein, isoforms H/M/V;Longitudinals lacking protein, isoforms H/M/V;Longitudinals lacking protein, isoforms H/M/V;Longitudinals lacking protein, isoforms H/M/V;Longitudinals lacking protein, isoforms H/M/V;Longitudinals lacking protein, isoforms H/M/V;Longitudinals lacking…	Hypo
NC_007081.3	3902841	3902999	CpG	15.45	42.64	158	-32.19894456	9	6	0.013132048	0.324473629	NC_007081.3	3901995	3903526	XM_006560803.1;XM_006560802.1_cds	158	Protein phosphatase 1 regulatory subunit 15A;Protein phosphatase 1 regulatory subunit 15A	Hypo
NC_007082.3	705936	706087	CpG	19.72	63.02	151	-29.71406399	12	5	0.008142075	0.408680598	NC_007082.3	705046	706144	XM_393883.5_cds	151	Proteasome activator complex subunit 3	Hypo
NC_007083.3	4548153	4548339	CpG	32.05	0	186	48.37463366	9	8	0.000432971	0.027818383	miss	miss	miss	miss	miss	miss	Hyper
