# Supplementary material for: Genome-Wide Differential DNA Methylation in Reproductive, Morphological, and Visual System Differences Between Queen Bee and Worker Bee (Apis mellifera)
Source: Front Genet. 2020 Aug 7;11:770. doi: 10.3389/fgene.2020.00770 (PMC7438783; doi:10.3389/fgene.2020.00770)
Supplement: TABLE S9 — The percent of DMGs involved in immunity and responses to biotic and abiotic stress. [file Table_9.XLS]

Chr	Start	End	Class	W5d	Q5d	Width	mean.meth.diff	num.CpGs	num.DMCs	DMR.pvalue	DMR.qvalue	Chr	ChrStart	ChrEnd	ID	Length	Description	Hyper
NC_007070.3	4815517	4815688	CpG	0	21.15	171	-20.69940476	16	4	0.007415826	0.298513179	NC_007070.3	4813885	4819842	XM_006561957.1_cds	171	Nuclear receptor corepressor 1	Hypo
NC_007070.3	12043454	12043620	CpG	9.1	20.39	166	-18.88002336	9	6	0.008870749	0.298513179	NC_007070.3	12042308	12043816	XM_624203.4_introns	166	N-acetyltransferase 9-like protein	Hypo
NC_007070.3	17755402	17755759	CpG	22.69	8.05	357	17.98620413	24	8	0.046126677	0.298513179	NC_007070.3	17754476	17755581	XM_006570863.1_introns	179	Dynein heavy chain, cytoplasmic	Hyper
NC_007071.3	439823	440055	CpG	38.74	11.36	232	28.57934566	12	6	0.030401501	0.294564198	miss	miss	miss	miss	miss	miss	Hyper
NC_007071.3	11939537	11939701	CpG	2.38	14.13	164	-17.54156633	9	2	0.018108189	0.294564198	NC_007071.3	11939468	11939750	XM_623130.4;XM_006569076.1_cds	164	Serine/threonine-protein kinase PLK4;Serine/threonine-protein kinase PLK4	Hypo
NC_007073.3	10091378	10091622	CpG	4.74	55.81	244	-44.21172346	10	8	0.013000298	0.263680753	miss	miss	miss	miss	miss	miss	Hypo
NC_007073.3	10509195	10509376	CpG	0	6.7	181	-10.96866097	11	2	0.048503958	0.263680753	NC_007073.3	10508878	10509349	XM_006567310.1_introns	154	Histone acetyltransferase KAT7	Hypo
NC_007073.3	12503114	12503282	CpG	12.5	30.09	168	-17.29904083	9	3	0.037801636	0.263680753	NC_007073.3	12503039	12503325	XM_006569340.1_cds	168	Ankyrin repeat domain-containing protein 17	Hypo
NC_007073.3	12522587	12522761	CpG	27.78	0	174	31.32849931	6	2	0.008396643	0.245601814	NC_007073.3	12521038	12523463	XM_006569342.1;XM_395146.5_cds	174	Serine/threonine-protein kinase LATS1;Serine/threonine-protein kinase LATS1	Hyper
NC_007074.3	11680222	11680401	CpG	40.15	17.16	179	27.15041814	7	2	0.049390075	0.331993197	NC_007074.3	11680214	11680815	XM_006567844.1;XM_006567845.1;XM_006567846.1;XM_006567847.1;XM_396763.5_cds	179	Metastasis-associated protein MTA3;Metastasis-associated protein MTA3;Metastasis-associated protein MTA3;Metastasis-associated protein MTA3;Metastasis-associated protein MTA3	Hyper
NC_007075.3	4722973	4723146	CpG	7.22	69.15	173	-54.26628344	7	5	0.005027103	0.276113986	NC_007075.3	4721301	4723152	XM_006561306.1_cds	173	miss	Hypo
NC_007075.3	4724960	4725223	CpG	0	61.37	263	-56.38096285	13	12	0.00593464	0.276113986	NC_007075.3	4724630	4725449	XR_409058.1;XR_409059.1;XM_392939.5;XR_409058.1;XR_409059.1_cds	263	miss;miss;Hemocyte protein-glutamine gamma-glutamyltransferase;miss;miss	Hypo
NC_007075.3	6126774	6126932	CpG	36.08	1.33	158	32.94988822	8	5	0.002634602	0.223941131	NC_007075.3	6126673	6126963	XM_006562442.1;XM_006562444.1;XM_006562443.1_cds	158	Uncharacterized protein C4orf29 homolog;Uncharacterized protein C4orf29 homolog;Uncharacterized protein C4orf29 homolog	Hyper
NC_007075.3	7456664	7456887	CpG	33.18	0	223	30.88151927	7	3	0.049978706	0.317207104	NC_007075.3	7456287	7457182	XM_006564080.1;XM_006564081.1;XM_006564081.1_cds	223	Sushi, von Willebrand factor type A, EGF and pentraxin domain-containing protein 1;Sushi, von Willebrand factor type A, EGF and pentraxin domain-containing protein 1;Sushi, von Willebrand factor type A, EGF and pentraxin domain-containing protein 1	Hyper
NC_007075.3	7859961	7860124	CpG	58.08	34.24	163	21.06397684	6	2	0.041948529	0.317207104	NC_007075.3	7859860	7860159	XM_006565131.1;XM_006565128.1;XM_006565132.1;XM_006565129.1;XM_003250536.2;XM_006565130.1_cds	163	Unconventional myosin-IXa;Unconventional myosin-IXa;Unconventional myosin-IXa;Unconventional myosin-IXa;Unconventional myosin-IXa;Unconventional myosin-IXa	Hyper
NC_007075.3	14891644	14891821	CpG	27.25	6.06	177	10.90245682	11	5	0.025344392	0.317207104	NC_007075.3	14891613	14891798	XM_624022.4_cds	154	Dihydrolipoyllysine-residue acetyltransferase component of pyruvate dehydrogenase complex, mitochondrial	Hyper
NC_007076.3	1829768	1829928	CpG	42.9	4.93	160	37.15150271	6	4	0.00601563	0.291156472	miss	miss	miss	miss	miss	miss	Hyper
NC_007076.3	8999125	8999282	CpG	9.47	48.72	157	-27.67667938	11	6	0.027751372	0.312630078	miss	miss	miss	miss	miss	miss	Hypo
NC_007078.3	6142537	6142696	CpG	36.41	19.49	159	21.05518345	6	3	0.011911825	0.290733563	NC_007078.3	6142067	6142740	XM_006561891.1_cds	159	Histone-lysine N-methyltransferase, H3 lysine-36 and H4 lysine-20 specific	Hyper
NC_007078.3	6337976	6338137	CpG	3.75	43.69	161	-34.23291925	5	3	0.038850708	0.290733563	NC_007078.3	6336689	6338669	XM_006561704.1;XM_006561703.1_cds	161	Tonsoku-like protein;Tonsoku-like protein	Hypo
NC_007078.3	10675656	10675860	CpG	39.63	11.97	204	28.94734697	14	7	0.001094563	0.166594054	NC_007078.3	10675623	10675795	XM_006567587.1_cds	139	Ribosome biogenesis protein TSR3 homolog	Hyper
NC_007078.3	10675656	10675860	CpG	39.63	11.97	204	28.94734697	14	7	0.001094563	0.166594054	NC_007078.3	10675645	10675870	XM_006567468.1;XM_001121463.3_cds	204	miss;miss	Hyper
NC_007079.3	7303069	7303255	CpG	11.78	0	186	16.56271465	14	4	0.022465526	0.28966703	NC_007079.3	7303053	7305840	XM_003250420.2;XM_006564450.1;XM_006564451.1_cds	186	Double-stranded RNA-binding protein Staufen homolog 2;Double-stranded RNA-binding protein Staufen homolog 2;Double-stranded RNA-binding protein Staufen homolog 2	Hyper
NC_007081.3	3868635	3868982	CpG	28.89	19.35	347	14.94165438	15	6	0.048178318	0.282588505	NC_007081.3	3868611	3869127	XM_393406.5;XM_006560798.1_cds	347	RNA-binding protein 26;RNA-binding protein 26	Hyper
NC_007082.3	649653	649976	CpG	46.64	19.13	323	25.17937472	19	8	0.003043902	0.032682772	NC_007082.3	649586	649836	XM_006557872.1_cds	183	Ornithine decarboxylase antizyme 1	Hyper
NC_007082.3	655297	655482	CpG	21.51	43.46	185	-16.2075355	10	2	0.007426083	0.037337841	NC_007082.3	652327	655865	XR_119747.2_cds	185	miss	Hypo
NC_007082.3	708750	709054	CpG	31.62	40.85	304	-13.12207684	10	4	0.007589752	0.037337841	NC_007082.3	708799	709124	XM_006557816.1_cds	255	26S proteasome non-ATPase regulatory subunit 11	Hypo
NC_007082.3	1018591	1018816	CpG	19.91	15.7	225	16.14653105	11	5	0.005401236	0.037337841	NC_007082.3	1018609	1018816	XM_006557831.1;XM_006557830.1;XM_623896.4_cds	207	Atrial natriuretic peptide-converting enzyme;Atrial natriuretic peptide-converting enzyme;Atrial natriuretic peptide-converting enzyme	Hyper
NC_007082.3	1123369	1123655	CpG	6	30.18	286	-24.87796888	10	4	0.003800322	0.032682772	NC_007082.3	1123321	1123656	XM_006557846.1;XM_624207.4_cds	286	ATP-dependent RNA helicase DDX42;ATP-dependent RNA helicase DDX42	Hypo
NC_007082.3	1313415	1313916	CpG	20.57	32.43	501	-10.22125674	43	7	0.001997542	0.031385642	NC_007082.3	1313272	1314484	XM_006557867.1;XM_396712.5_cds	501	Protein kintoun;Protein kintoun	Hypo
NC_007082.3	1686922	1687134	CpG	13.35	0	212	11.32867133	10	2	0.003515652	0.032682772	NC_007082.3	1686817	1687163	XM_003249269.2_cds	212	Cyclic AMP-dependent transcription factor ATF-2	Hyper
NC_007082.3	2847895	2848211	CpG	0	12.33	316	-18.11329354	14	4	0.001858321	0.031385642	miss	miss	miss	miss	miss	miss	Hypo
NC_007082.3	3129249	3129461	CpG	8.19	0	212	17.95982269	8	3	0.010854024	0.037337841	NC_007082.3	3128570	3129702	XM_391965.5_cds	212	AP-2 complex subunit mu	Hyper
NC_007082.3	3142017	3142184	CpG	50.75	57.82	167	-13.3943385	6	2	0.017819464	0.04256872	NC_007082.3	3141936	3142425	XM_391963.5_cds	167	mRNA-decapping enzyme 1B	Hypo
NC_007082.3	3660160	3660341	CpG	53.43	67.17	181	-14.83362171	7	2	0.013533831	0.04013481	NC_007082.3	3658784	3662103	XM_006560318.1_cds	181	Partitioning defective 3 homolog B	Hypo
NC_007082.3	3660642	3660806	CpG	33.43	50.82	164	-15.01777088	8	2	0.00964427	0.037337841	NC_007082.3	3658784	3662103	XM_006560318.1_cds	164	Partitioning defective 3 homolog B	Hypo
NC_007082.3	4638980	4639183	CpG	37.92	34.72	203	-19.33690561	5	3	0.024234923	0.045177494	NC_007082.3	4638199	4639424	XM_003249622.2_cds	203	Transmembrane protein 45B	Hypo
NC_007082.3	5958848	5959029	CpG	0	0	181	10.5751634	10	2	0.007350879	0.037337841	NC_007082.3	5958828	5958996	XM_006562752.1_cds	148	Abhydrolase domain-containing protein 2	Hyper
NC_007082.3	5968209	5968411	CpG	55.69	22.19	202	27.60681871	6	4	0.013226914	0.04013481	NC_007082.3	5968280	5968396	XM_006562726.1;XM_006562727.1;NM_001134333.1;XM_006562750.1;XM_006562751.1;XM_006562754.1;XM_397038.5_introns	116	miss;miss;miss;Insulin-like peptide receptor;miss;miss;Insulin-like peptide receptor	Hyper
NC_007082.3	5968209	5968411	CpG	55.69	22.19	202	27.60681871	6	4	0.013226914	0.04013481	NC_007082.3	5968280	5968396	XM_001120037.3_introns	116	Structural maintenance of chromosomes protein 5	Hyper
NC_007082.3	9547040	9547227	CpG	22.89	42.78	187	-17.04281742	8	3	0.005962244	0.037337841	NC_007082.3	9547028	9547426	XM_396386.4;XM_006565004.1_cds	187	Coiled-coil domain-containing protein 47;Coiled-coil domain-containing protein 47	Hypo
NC_007083.3	6905520	6905690	CpG	23.01	52.46	170	-33.80473478	8	5	0.036563493	0.311310079	NC_007083.3	6905460	6905751	XM_006562958.1;XM_006562959.1;XM_392006.5;XM_006562960.1;XM_006562961.1_cds	170	Mediator of RNA polymerase II transcription subunit 24;Mediator of RNA polymerase II transcription subunit 24;Mediator of RNA polymerase II transcription subunit 24;Mediator of RNA polymerase II transcription subunit 24;Mediator of RNA polymerase II transcription subunit 24	Hypo
NC_007083.3	10235171	10235325	CpG	0	32.14	154	-28.94021739	4	2	0.007228747	0.311310079	NC_007083.3	10235176	10235319	XM_001122444.3;XM_006565804.1;XM_006565806.1;XM_006565807.1;XM_006565805.1;XM_006565808.1;XM_006565803.1_introns	143	Neogenin;Neogenin;Neogenin;Neogenin;Neogenin;Neogenin;Neogenin	Hypo
NC_007084.3	7894418	7894572	CpG	23.73	3.33	154	18.46296296	10	3	0.031674714	0.318613505	NC_007084.3	7894419	7894635	XM_006563510.1;XM_006563511.1_cds	153	Metal transporter CNNM2;Metal transporter CNNM2	Hyper
